# Supplementary material for: Serial ‘deep-sampling’ PCR of fragmented DNA reveals the wide range of Trypanosoma cruzi burden among chronically infected human, macaque, and canine hosts, and allows accurate monitoring of parasite load following treatment
Source: eLife. 2025 Apr 15;14:RP104547. doi: 10.7554/eLife.104547 (PMC11999692; doi:10.7554/eLife.104547)
Supplement: Figure 1—source data 1. [file elife-104547-fig1-data1.xlsx]

## Sheet: Sheet1
reactions for which a Ct value is not obtained are set at "40"
10-3	10-4	10-5	10-6	10-7	no DNA
29.2	40	37.45	40	37.04	40
30.81	31.29	40	40	40	40
30.02	34.07	40	38.55	40	40
29.55	34.94	36.93	40	40	40
30.39	36.16	33.33	34.56	40	40
29.48	32.77	33.59	40	40	40
30.88	34.15	40	40	40
30.28	40	34.16	40	40
29.3	32.45	40	33.96	35.04
29.9	37.12	40	40	40
32.04	31.61	40	40	35.8
30.09	36.09	40	40	40
30.03	32.62	35.59	36.28	40
30.18	38.61	36.38	37.55	40
30.13	33.24	33.59	40	40
30.18	40	40	40	36.26
30.37	36.44	40	40	36.27
29.28	32.4	36.72	40	40
29.8	35.95	34.26	40	40
30.76	34.29	34.24	37.4	36.16
30.1	31.3	40	35.63	36.33
30.44	34.04	37.77	35.56	40
29.84	31.83	40	36	40
30.1	33.54	40	36.36	36.48
30.32	34.35	40	40	40
29.41	34.39	40	40	40
31	34.01	40	40	40
30.04	34.54	36.09	40	40
29.73	32.86	33.62	40	40
29.74	33.03	35.4	40	40
29.06	31.42	40	40	35.48
30.18	34.5	40	40	34.81
30.02	40	36.39	34.34	40
29.63	32.12	40	40	40
30.55	32.23	33.19	35.4	40
29.86	31.04	40	35.88	40
29.32	32.48	40	33.49	40
29.76	35.31	37.37	40	35.17
29.51	31.61	40	40	40
29.35	40	40	40	34.95
				38.07
				40
				40
