# Supplementary material for: Serial ‘deep-sampling’ PCR of fragmented DNA reveals the wide range of Trypanosoma cruzi burden among chronically infected human, macaque, and canine hosts, and allows accurate monitoring of parasite load following treatment
Source: eLife. 2025 Apr 15;14:RP104547. doi: 10.7554/eLife.104547 (PMC11999692; doi:10.7554/eLife.104547)
Supplement: Figure 2—source data 1. [file elife-104547-fig2-data1.xlsx]

## Sheet: Sheet1
reactions for which a Ct value is not obtained are set at "40"
P7	P2	P12	P4	P6	P9	P3	P10	P11	P21	P13	P19	P18	P20	P5	P15	P16	P17	N1	N2
37.43	40	40	40	29.06	36.98	40	29.89	35.84	30.29	34.31	29.98	29.22	30.68	29.78	25.74	23.23	23.1	40	40
36.6	40	40	40	40	40	40	31.46	36.74	31.78	31.4	36.52	29.94	30.29	30.14	25.25	23.38	22.84	40	40
36.9	40	40	40	40	40	40	35.35	40	32.52	29.81	31.63	30.83	30.32	30.46	28	23.86	23.14	40	40
37.95	40	40	40	40	40	40	40	40	33.44	33.11	30.34	29.27	30.09	28.22	26.16	24.12	22.67	40	40
37.7	40	40	40	40	40	40	40	40	40	28.16	31.45	33.05	30.19	29.08	26.1	23.73	23.21	40	40
40	40	40	40	40	40	40	40	40	40	32.56	30.66	31.18	31.27	29.05	24.66	23.33	21.94	40	40
40	40	40	40	40	40	40	40	40	40	40	40	30.4	30.61	30.66	25.23	23.75	23.05	40	40
40	40	40	40	40	40	40	40	40	40	40	40	34.62	35.77	29.04	25.91	24	22.25	40	40
40	40	40	40	40	40	40	40	40	40	40	40	33.46	28.9	30.57	25.2	23.28	22.13	40	40
40	40	40	40	40	40	40	40	40	40	40	40	33.37	40	29.37	25.2	22.66	22.44	40	40
40	40	40	40	40	40	40	40	40										40	40
40	40	40	40	40	40	40	40	40										40	40
40	40	40	40	40	40	40	40	40										40	40
40	40	40	40	40	40	40	40	40										40	40
40	40	40	40	40	40	40	40	40										40	40
40	40	40	40	40	40	40	40	40										40	40
40	40	40	40	40	40	40	40	40										40	40
40	40	40	40	40	40	40	40	40										40	40
40	40	40	40	40	40	40	40	40										40	40
40	40	40	40	40	40	40	40	40										40	40
40	40	40	40	40	40	40		40										40	40
40	40	40	40	40	40	40		40										40	40
40	40	40	40	40	40	40		40										40	40
40	40	40	40	40	40	40		40										40	40
40	40	40	40	40	40	40		40										40	40
40	40	40	40	40	40	40		40										40	40
40	40	40	40	40	40	40		40										40	40
40	40	40	40	40	40	40		40										40	40
40	40	40	40	40	40	40		40										40	40
40	40	40	40	40	40	40		40										40	40
40	40	40	40	40	40	40		40										40	40
40	40	40	40	40	40	40		40										40	40
40	40	40	40	40	40	40		40										40	40
40	40	40	40	40	40	40		40										40	40
40	40	40	40	40	40	40		40										40	40
40	40	40	40	40	40	40		40										40	40
40	40	40	40	40	40	40		40										40	40
40	40	40	40	40	40	40		40										40	40
40	40	40	40	40	40	40		40										40	40
40	40	40	40	40	40	40		40										40	40
40	40	40	40	40	40	40		40										40	40
40	40	40	40	40	40	40		40										40	40
40	40	40	40	40	40	40		40										40	40
40	40	40	40	40	40	40		40										40	40
40	40	40	40	40	40	40		40										40	40
40	40	40	40	40	40	40		40										40	40
40	40	40	40	40	40	40		40										40	40
40	40	40	40	40	40	40		40										40	40
40	40	40	40	40	40	40		40										40	40
40	40	40	40	40	40	40		40										40	40
40	40	40	40	40	40	40		40										40	40
40	40	40	40	40	40	40		40										40	40
40	40	40	40	40	40	40		40										40	40
40	40	40	40	40	40	40		40										40	40
40	40	40	40	40	40	40		40										40	40
40	40	40	40	40	40	40		40										40	40
40	40	40	40	40	40	40		40										40	40
40	40	40	40	40	40	40		40										40	40
40	40	40	40	40	40	40		40										40	40
40	40	40	40	40	40	40		40										40	40
40	40	40	40	40	40	40		40										40	40
40	40	40	40	40	40	40		40										40	40
40	40	40	40	40	40	40		40										40	40
40	40	40	40	40	40	40		40										40	40
40	40	40	40	40	40	40		40										40	40
40	40	40	40	40	40	40		40										40	40
40	40	40	40	40	40	40		40										40	40
40	40	40	40	40	40	40		40										40	40
40	40	40	40	40	40	40		40										40	40
40	40	40	40	40	40	40		40										40	40
40	40	40	40	40	40	40		40										40	40
40	40	40	40	40	40	40		40										40	40
40	40	40	40	40	40	40		40										40	40
40	40	40	40	40	40	40		40										40	40
40	40	40	40	40	40	40		40										40	40
40	40	40	40	40	40	40		40										40	40
40	40	40	40	40	40	40		40										40	40
40	40	40	40	40	40	40		40										40	40
40	40	40	40	40	40	40		40										40	40
40	40	40	40	40	40	40		40										40	40
40	40	40	40	40	40	40		40										40	40
40	40	40	40	40	40	40		40										40	40
40	40	40	40	40	40	40		40										40	40
40	40	40	40	40	40	40		40										40	40
40	40	40	40	40	40	40		40										40	40
40	40	40	40	40	40	40		40										40	40
40	40	40	40	40	40	40		40										40	40
40	40	40	40	40	40	40		40										40	40
40	40	40	40	40	40	40		40										40	40
40	40	40	40	40	40	40		40										40	40
40	40	40	40	40	40	40		40										40	40
40	40	40	40	40	40	40		40										40	40
40	40	40	40	40	40	40		40										40	40
40	40	40	40	40	40	40		40										40	40
40	40	40	40	40	40	40		40										40	40
40	40	40	40	40	40	40		40										40	40
40	40	40	40	40	40	40		40										40	40
40	40	40	40	40	40	40		40										40	40
40	40	40	40	40	40	40		40										40	40
40	40	40	40	40	40	40		40										40	40
40	40	40	40	40	40	40		40										40	40
40	40	40	40	40	40	40		40										40	40
40	40	40	40	40	40	40		40										40	40
40	40	40	40	40	40	40		40										40	40
40	40	40	40	40	40	40		40										40	40
40	40	40	40	40	40	40		40										40	40
40	40	40	40	40	40	40		40										40	40
40	40	40	40	40	40	40		40										40	40
40	40	40	40	40	40	40		40										40	40
40	40	40	40	40	40	40		40										40	40
40	40	40	40	40	40	40		40										40	40
40	40	40	40	40	40	40		40										40	40
40	40	40	40			40												40	40
40	40	40	40			40												40	40
40	40	40	40			40												40	40
40	40	40	40			40												40	40
40	40	40	40			40												40	40
40	40	40	40			40												40	40
40	40	40	40			40												40	40
40	40	40	40			40												40	40
40	40	40	40			40												40	40
40	40	40	40			40												40	40
40	40	40	40			40												40	40
40	40	40	40			40												40	40
40	40	40	40			40												40	40
40	40	40	40			40												40	40
40	40	40	40			40												40	40
40	40	40	40			40												40	40
40	40	40	40			40												40	40
40	40	40	40			40												40	40
40	40	40	40			40												40	40
40	40	40	40			40												40	40
40	40	40	40			40												40	40
40	40	40	40			40												40	40
40	40	40	40			40												40	40
40	40	40	40			40												40	40
40	40	40	40			40												40	40
40	40	40	40			40												40	40
40	40	40	40			40												40	40
40	40	40	40			40												40	40
40	40	40	40			40												40	40
40	40	40	40			40												40	40
40	40	40	40			40												40	40
40	40	40	40			40												40	40
40	40	40	40			40												40	40
40	40	40	40			40												40	40
40	40	40	40			40												40	40
40	40	40	40			40												40	40
40	40	40	40			40												40	40
40	40	40	40			40												40	40
40	40	40	40			40												40	40
40	40	40	40			40												40	40
40	40	40	40			40												40	40
40	40	40	40			40												40	40
40	40	40	40			40												40	40
40	40	40	40			40												40	40
40	40	40	40			40												40	40
40	40	40	40			40												40	40
40	40	40	40			40												40	40
40	40	40	40			40												40	40
40	40	40	40			40												40	40
40	40	40	40			40												40	40
40	40	40	40			40												40	40
40	40	40	40			40												40	40
40	40	40	40			40												40	40
40	40	40	40			40												40	40
40	40	40	40			40												40	40
40	40	40	40			40												40	40
40	40	40	40			40												40	40
40	40	40	40			40												40	40
40	40	40	40			40												40	40
40	40	40	40			40												40	40
40	40	40	40			40												40	40
40	40	40	40			40												40	40
40	40	40	40			40												40	40
40	40	40	40			40												40	40
40	40	40	40			40												40	40
40	40	40	40			40												40	40
40	40	40	40			40												40	40
40	40	40	40			40												40	40
40	40	40	40			40												40	40
40	40	40	40			40												40	40
40	40	40	40			40												40	40
40	40	40	40			40												40	40
40	40	40	40			40												40	40
40	40	40	40			40												40	40
40	40	40	40			40												40	40
40	40	40	40			40												40	40
40	40	40	40			40												40	40
40	40	40	40			40												40	40
40	40	40	40			40												40	40
40	40	40	40			40												40	40
40	40	40	40			40												40	40
40	40	40	40			40												40	40
40	40	40	40			40												40	40
40	40	40	40			40												40	40
40	40	40	40			40												40	40
40	40	40	40			40												40	40
40	40	40	40			40												40	40
40	40	40	40			40												40	40
40	40	40	40			40												40	40
40	40	40	40			40												40	40
40	40	40	40			40												40	40
40	40	40	40			40												40	40
40	40	40	40			40
40	40	40	40			40
40	40	40	40			40
40	40	40	40			40
40	40	40	40			40
40	40	40	40			40
40	40	40	40			40
40	40	40	40			40
40	40	40	40			40
40	40	40	40			40
40	40	40	40			40
40	40	40	40			40
40	40	40	40			40
40	40	40	40			40
40	40	40	40			40
40	40	40	40			40
40	40	40	40			40
40	40	40	40			40
40	40	40	40			40
40	40	40	40			40
40	40	40	40			40
40	40	40	40			40
40	40	40	40			40
40	40	40	40			40
40	40	40	40			40
40	40	40	40			40
40	40	40	40			40
40	40	40	40			40
40	40	40	40			40
40	40	40	40			40
40	40	40	40			40
40	40	40	40			40
40	40	40	40			40
40	40	40	40			40
40	40	40	40			40
40	40	40	40			40
40	40	40	40			40
40	40	40	40			40
40	40	40	40			40
40	40	40	40			40
40	40	40	40			40
40	40	40	40			40
40	40	40	40			40
40	40	40	40			40
40	40	40	40			40
40	40	40	40			40
40	40	40	40			40
40	40	40	40			40
40	40	40	40			40
40	40	40	40			40
40	40	40	40			40
40	40	40	40			40
40	40	40	40			40
40	40	40	40			40
40	40	40	40			40
40	40	40	40			40
40	40	40	40			40
40	40	40	40			40
40	40	40	40			40
40	40	40	40			40
40	40	40	40			40
40	40	40	40			40
40	40	40	40			40
40	40	40	40			40
40	40	40	40			40
40	40	40	40			40
40	40	40	40			40
40	40	40	40			40
40	40	40	40			40
40	40	40	40			40
40	40	40	40			40
40	40	40	40			40
40	40	40	40			40
40	40	40	40			40
40	40	40	40			40
40	40	40	40			40
40	40	40	40			40
40	40	40	40			40
40	40	40	40			40
40	40	40	40			40
40	40	40	40			40
40	40	40	40			40
40	40	40	40			40
40	40	40	40			40
40	40	40	40			40
40	40	40	40			40
40	40	40	40			40
40	40	40	40			40
	40	40	40			40
	40	40	40			40
	40	40	40			40
	40	40	40			40
	40	40	40			40
	40	40	40			40
	40	40	40			40
	40	40	40			40
	40	40	40			40
	40	40	40			40
	40	40	40			40
	40	40	40			40
	40	40	40			40
	40	40	40			40
	40	40	40			40
	40	40	40			40
	40	40	40			40
	40	40	40			40
	40	40	40			40
	40	40	40			40
	40	40	40			40
	40	40	40			40
	40	40	40			40
	40	40	40			40
	40	40	40			40
	40	40	40			40
	40	40	40			40
	40	40	40			40
	40	40	40			40
	40	40	40			40
	40	40	40			40
	40	40	40			40
	40	40	40			40
	40	40	40			40
	40	40	40			40
	40	40	40			40
	40	40	40			40
	40	40	40			40
	40	40	40			40
	40	40	40			40
	40	40	40			40
	40	40	40			40
	40	40	40			40
	40	40	40			40
	40	40	40			40
	40	40	40			40
	40	40	40			40
	40	40	40			40
	40	40	40			40
	40	40	40			40
	40	40	40			40
	40	40	40			40
	40	40	40			40
	40	40	40			40
	40	40	40			40
	40	40	40			40
	40	40	40			40
	40	40	40			40
	40	40	40			40
	40	40	40			40
	40	40	40			40
	40	40	40			40
	40	40	40			40
	40	40	40			40
	40	40	40			40
	40	40	40			40
	40	40	40			40
	40	40	40			40
	40	40	40			40
	40	40	40			40
	40	40	40			40
	40	40	40			40
	40	40	40			40
	40	40	40			40
	40	40	40			40
	40	40	40			40
	40	40	40			40
	40	40	40			40
	40	40	40			40
	40	40	40			40
	40	40	40			40
	40	40	40			40
	40	40	40			40
	40	40	40			40
	40	40	40			40
	40	40	40			40
	40	40	40			40
	40	40	40			40
	40	40	40			40
	40	40	40			40
	40	40	40			40
	40	40	40			40
						40
						40
						40
						40
