# Supplementary material for: Serial ‘deep-sampling’ PCR of fragmented DNA reveals the wide range of Trypanosoma cruzi burden among chronically infected human, macaque, and canine hosts, and allows accurate monitoring of parasite load following treatment
Source: eLife. 2025 Apr 15;14:RP104547. doi: 10.7554/eLife.104547 (PMC11999692; doi:10.7554/eLife.104547)
Supplement: Figure 3—figure supplement 1—source data 1. [file elife-104547-fig3-figsupp1-data1.xlsx]

## Sheet: P7
reactions for which a Ct value is not obtained are set at "40"
June	July	August	September	October	November	December	January	March	April	May
37.43	40	40	40	40	40	40	40	40	40	32.86
36.6	40	40	40	40	40	40	40	40	40	40
36.9	40	40	40	40	40	40	40	40	40	40
37.95	40	40	40	40	40	40	40	40	40	40
37.7	40	40	40	40	40	40	40	40	40	40
40	40	40	40	40	40	40	40	40	40	40
40	40	40	40	40	40	40	40	40	40	40
40	40	40	40	40	40	40	40	40	40	40
40	40	40	40	40	40	40	40	40	40	40
40	36.58	40	40	40	40	40	40	40	31.8	40
40	40	40	34.41	40	40	40	40	40	40
40	40	40	40	40	40	40	40	40	40
40	40	40	40	40	40	40	40	40	40
40	40	40	40	40	40	40	40	40	40
40	40	40	40	40	40	40	40	40	40
40	40	40	40	40	40	40	40	40	40
40	40	40	40	40	40	40	40	40	40
40	40	40	40	40	40	40	40	40	40
40	40	40	40	40	40	40	40	40	40
40	40	40	40	40	40	40	40	40	40
40	40	40	40	40	40	40	40	40
40	40	40	40	40	40	40	40	40
40	40	40	40	40	40	40	40	40
40	40	40	40	40	40	40	40	40
40	40	40	40	40	40	40	40	40
40	40	40	40	40	40	40	40	40
40	40	40	40	40	40	40	40	40
40	40	40	40	40	40	40	40	40
40	40	40	40	40	40	40	40	40
40	40	40	40	40	40	40	40	40
40	40	40	40	40	40	40	40	40
40	40	40	40	40	40	40	40	40
40	40	40	40	40	40	40	40	40
40	40	40	40	40	40	40	40	40
40	40	40	40	40	40	40	40	40
40	40	40	40	40	40	40	40	40
40	40	40	40	40	40	40	40	40
40	40	40	40	40	40	40	40	40
40	40	40	40	40	40	40	40	40
40	40	40	40	40	40	40	40	40
40	40	40	40	40	40	40	40	40
40	40	40	40	40	40	40	40	40
40	40	40	40	40	40	40	40	40
40	40	40	40	40	40	40	40	40
40	40	40	40	40	40	40	40	40
40	40	40	40	40	40	40	40	40
40	40	40	40	40	40	40	40	40
40	40	40	40	40	40	40	40	40
40	40	40	40	40	40	40	40	40
40	40	40	40	40	40	40	40	40
40	40	40	40	40	40	40	40	40
40	40	40	40	40	40	40	40	40
40	40	40	40	40	40	40	40	40
40	40	40	40	40	40	40	40	40
40	40	40	40	40	40	40	40	40
40	40	40	40	40	40	40	40	40
40	40	40	40	40	40	40	40	40
40	40	40	40	40	40	40	40	40
40	40	40	40	40	40	40	40	40
40	40	40	40	40	40	40	40	40
40	40	40	40	40	40	40	40	40
40	40	40	40	40	40	40	40	40
40	40	40	40	40	40	40	40	40
40	40	40	40	40	40	40	40	40
40	40	40	40	40	40	40	40	40
40	40	40	40	40	40	40	40	40
40	40	40	40	40	40	40	40	40
40	40	40	40	40	40	40	40	40
40	40	40	40	40	40	40	40	40
40	40	40	40	40	40	40	40	40
40	40	40	40	40	40	40	40	40
40	40	40	40	40	40	40	40	40
40	40	40	40	40	40	40	40	40
40	40	40	40	40	40	40	40	40
40	40	40	40	40	40	40	40	40
40	40	40	40	40	40	40	40	40
40	40	40	40	40	40	40	40	40
40	40	40	40	40	40	40	40	40
40	40	40	40	40	40	40	40	40
40	40	40	40	40	40	40	40	40
40	40	40	40	40	40	40	40	40
40	40	40	40	40	40	40	40	40
40	40	40	40	40	40	40	40	40
40	40	40	40	40	40	40	40	40
40	40	40	40	40	40	40	40	40
40	40	40	40	40	40	40	40	40
40	40	40	40	40	40	40	40	40
40	40	40	40	40	40	40	40	40
40	40	40	40	40	40	40	40	40
40	40	40	40	40	40	40	40	40
40	40	40	40	40	40	40	40	40
40	40	40	40	40	40	40	40	40
40	40	40	40	40	40	40	40	40
40	40	40	40	40	40	40	40	40
40	40	40	40	40	40	40	40	40
40	40	40	40	40	40	40	40	40
40	40	40	40	40	40	40	40	40
40	40	40	40	40	40	40	40	40
40	40	40	40	40	40	40	40	40
40	40	40	40	40	40	40	40	40
40	40	40	40	40	40	40	40	40
40	40	40	40	40	40	40	40	40
40	40	40	40	40	40	40	40	40
40	40	40	40	40	40	40	40	40
40	40	40	40	40	40	40	40	40
40	40	40	40	40	40	40	40	40
40	40	40	40	40	40	40	40	40
40	40	40	40	40	40	40	40	40
40	40	40	40	40	40	40	40	40
40	40	40	40	40	40	40	40	40
40	40	40	40	40	40	40	40	40
40	40	40	40	40	40	40	40	40
40	40	40	40	40	40	40	40	40
40	40	40	40	40	40	40	40	40
40	40	40	40	40	40	40	40	40
40	40	40	40	40	40	40	40	40
40	40	40	40	40	40	40	40	40
40	40	40	40	40	40	40	40	40
40	40	40	40	40	40	40	40	40
40	40	40	40	40	40	40	40	40
40	40	40	40	40	40	40	40	40
40	40	40	40	40	40	40	40	40
40	40	40	40	40	40	40	40	40
40	40	40	40	40	40	40	40	40
40	40	40	40	40	40	40	40	40
40	40	40	40	40	40	40	40	40
40	40	40	40	40	40	40	40	40
40	40	40	40	40	40	40	40	40
40	40	40	40	40	40	40	40	40
40	40	40	40	40	40	40	40	40
40	40	40	40	40	40	40	40	40
40	40	40	40	40	40	40	40	40
40	40	40	40	40	40	40	40	40
40	40	40	40	40	40	40	40	40
40	40	40	40	40	40	40	40	40
40	40	40	40	40	40	40	40	40
40	40	40	40	40	40	40	40	40
40	40	40	40	40	40	40	40	40
40	40	40	40	40	40	40	40	40
40	40	40	40	40	40	40	40	40
40	40	40	40	40	40	40	40	40
40	40	40	40	40	40	40	40	40
40	40	40	40	40	40	40	40	40
40	40	40	40	40	40	40	40	40
40	40	40	40	40	40	40	40	40
40	40	40	40	40	40	40	40	40
40	40	40	40	40	40	40	40	40
40	40	40	40	40	40	40	40	40
40	40	40	40	40	40	40	40	40
40	40	40	40	40	40	40	40	40
40	40	40	40	40	40	40	40	40
40	40	40	40	40	40	40	40	40
40	40	40	40	40	40	40	40	40
40	40	40	40	40	40	40	40	40
40	40	40	40	40	40	40	40	40
40	40	40	40	40	40	40	40	40
40	40	40	40	40	40	40	40	40
40	40	40	40	40	40	40	40	40
40	40	40	40	40	40	40	40	40
40	40	40	40	40	40	40	40	40
40	40	40	40	40	40	40	40	40
40	40	40	40	40	40	40	40	40
40	40	40	40	40	40	40	40	40
40	40	40	40	40	40	40	40	40
40	40	40	40	40	40	40	40	40
40	40	40	40	40	40	40	40	40
40	40	40	40	40	40	40	40	40
40	40	40	40	40	40	40	40	40
40	40	40	40	40	40	40	40	40
40	40	40	40	40	40	40	40	40
40	40	40	40	40	40	40	40	40
40	40	40	40	40	40	40	40	40
40	40	40	40	40	40	40	40	40
40	40	40	40	40	40	40	40	40
40	40	40	40	40	40	40	40	40
40	40	40	40	40	40	40	40	40
40	40	40	40	40	40	40	40	40
40	40	40	40	40	40	40	40	40
40	40	40	40	40	40	40	40	40
40	40	40	40	40	40	40	40	40
40	40	40	40	40	40	40	40	40
40	40	40	40	40	40	40	40	40
40	40	40	40	40	40	40	40	40
40	40	40	40	40	40	40	40	40
40	40	40	40	40	40	40	40	40
40	40	40	40	40	40	40	40	40
40	40	40	40	40	40	40	40	40
40	40	40	40	40	40	40	40	40
40	40	40	40	40	40	40	40	40
40	40	40	40	40	40	40	40	40
40	40	40	40	40	40	40	40	40
40	40	40	40	40	40	40	40	40
40	40	40	40	40	40	40	40	40
40	40	40	40	40	40	40	40	40
40	40	40	40	40	40	40	40	40
40	40	40	40	40	40	40	40	40
40	40	40	40	40	40	40	40	40
40	40	40	40	40	40	40	40	40
40	40	40	40	40	40	40	40	40
40	40	40	40	40	40	40	40	40
40	40	40	40	40	40	40	40	40
40	40	40	40	40	40	40	40	40
40	40	40	40	40	40	40	40	40
40	40	40	40	40	40	40	40	40
40	40	40	40	40	40	40	40	40
40	40	40	40	40	40	40	40	40
40	40	40	40	40	40	40	40	40
40	40	40	40	40	40	40	40	40
40	40	40	40	40	40	40	40	40
40	40	40	40	40	40	40	40	40
40	40	40	40	40	40	40	40	40
40	40	40	40	40	40	40	40	40
40	40	40	40	40	40	40	40	40
40	40	40	40	40	40	40	40	40
40	40	40	40	40	40	40	40	40
40	40	40	40	40	40	40	40	40
40	40	40	40	40	40	40	40	40
40	40	40	40	40	40	40	40	40
40	40	40	40	40	40	40	40	40
40	40	40	40	40	40	40	40	40
40	40	40	40	40	40	40	40	40
40	40	40	40	40	40	40	40	40
40	40	40	40	40	40	40	40	40
40	40	40	40	40	40	40	40	40
40	40	40	40	40	40	40	40	40
40	40	40	40	40	40	40	40	40
40	40	40	40	40	40	40	40	40
40	40	40	40	40	40	40	40	40
40	40	40	40	40	40	40	40	40
40	40	40	40	40	40	40	40	40
40	40	40	40	40	40	40	40	40
40	40	40	40	40	40	40	40	40
40	40	40	40	40	40	40	40	40
40	40	40	40	40	40	40	40	40
40	40	40	40	40	40	40	40	40
40	40	40	40	40	40	40	40	40
40	40	40	40	40	40	40	40	40
40	40	40	40	40	40	40	40	40
40	40	40	40	40	40	40	40	40
40	40	40	40	40	40	40	40	40
40	40	40	40	40	40	40	40	40
40	40	40	40	40	40	40	40	40
40	40	40	40	40	40	40	40	40
40	40	40	40	40	40	40	40	40
40	40	40	40	40	40	40	40	40
40	40	40	40	40	40	40	40	40
40	40	40	40	40	40	40	40	40
40	40	40	40	40	40	40	40	40
40	40	40	40	40	40	40	40	40
40	40	40	40	40	40	40	40	40
40	40	40	40	40	40	40	40	40
40	40	40	40	40	40	40	40	40
40	40	40	40	40	40	40	40	40
40	40	40	40	40	40	40	40	40
40	40	40	40	40	40	40	40	40
40	40	40	40	40	40	40	40	40
40	40	40	40	40	40	40	40	40
40	40	40	40	40	40	40	40	40
40	40	40	40	40	40	40	40	40
40	40	40	40	40	40	40	40	40
40	40	40	40	40	40	40	40	40
40	40	40	40	40	40	40	40	40
40	40	40	40	40	40	40	40	40
40	40	40	40	40	40	40	40	40
40	40	40	40	40	40	40	40	40
40	40	40	40	40	40	40	40	40
40	40	40	40	40	40	40	40	40
40	40	40	40	40	40	40	40	40
40	40	40	40	40	40	40	40	40
40	40	40	40	40	40	40	40	40
40	40	40	40	40	40	40	40	40
40	40	40	40	40	40	40	40	40
40	40	40	40	40	40	40	40	40
40	40	40	40	40	40	40	40	40
40	40	40	40	40	40	40	40	40
40	40	40	40	40	40	40	40	40
40	40	40	40	40	40	40	40	40
40	40	40	40	40	40	40	40	40
40	40	40	40	40	40	40	40	40
40	40	40	40	40	40	40	40	40
40	40	40	40	40	40	40	40	40
40	40	40	40	40	40	40	40	40
40	40	40	40	40	40	40	40	40
40	40	40	40	40	40	40	40	40
40	40	40	40	40	40	40	40	40
40	40	40	40	40	40	40	40	40
40	40	40	40	40	40	40	40	40
40	40	40	40	40	40	40	40	40
40	40	40	40	40	40	40	40	40
40	40	40	40	40	40	40	40	40
40	40	40	40	40	40	40	40	40
40	40	40	40	40	40	40	40	40
				40		40	40	40
				40		40	40	40
				40		40	40	40
				40		40	40	40
				40		40	40	40
				40		40	40	40
				40		40	40	40
				40		40	40	40
				40		40	40	40
				40		40	40	40
				40		40	40	40
				40		40	40	40
				40		40	40	40
				40		40	40	40
				40		40	40	40
				40		40	40	40
				40		40	40	40
				40		40	40	40
				40		40	40	40
				40		40	40	40
				40		40	40	40
				40		40	40	40
				40		40	40	40
				40		40	40	40
				40		40	40	40
				40		40	40	40
				40		40	40	40
				40		40	40	40
				40		40	40	40
				40		40	40	40
				40		40	40	40
				40		40	40	40
				40		40	40	40
				40		40	40	40
				40		40	40	40
				40		40	40	40
				40		40	40	40
				40		40	40	40
				40		40	40	40
				40		40	40	40
				40		40	40	40
				40		40	40	40
				40		40	40	40
				40		40	40	40
				40		40	40	40
				40		40	40	40
				40		40	40	40
				40		40	40	40
				40		40	40	40
				40		40	40	40
				40		40	40	40
				40		40	40	40
				40		40	40	40
				40		40	40	40
				40		40	40	40
				40		40	40	40
				40		40	40	40
				40		40	40	40
				40		40	40	40
				40		40	40	40
				40		40	40	40
				40		40	40	40
				40		40	40	40
				40		40	40	40
				40		40	40	40
				40		40	40	40
				40		40	40	40
				40		40	40	40
				40		40	40	40
				40		40	40	40
				40		40	40	40
				40		40	40	40
				40		40	40	40
				40		40	40	40
				40		40	40	40
				40		40	40	40
				40		40	40	40
				40		40	40	40
				40		40	40	40
				40		40	40	40
				40		40	40	40
				40		40	40	40
				40		40	40	40
				40		40	40	40
				40		40	40	40
				40		40	40	40
				40		40	40	40
				40		40	40	40
				40		40	40	40
				40		40	40	40
				40		40	40	40
				40		40	40	40
						40
						40
						40
						40

## Sheet: P2
reactions for which a Ct value is not obtained are set at "40"
June	July	August	September	October	November	December	January	March	April	May
40	40	40	40	30.41	40	40	40	40	40	34.68
40	40	40	40	40	40	40	40	40	40	40
40	40	40	40	40	40	40	40	40	40	40
40	40	40	40	40	40	40	40	40	40	40
40	40	40	40	40	40	40	40	40	40	40
40	40	40	40	40	40	40	40	40	40	40
40	40	40	40	40	40	40	40	40	40	40
40	40	40	40	40	40	40	40	40	40	40
40	40	40	40	40	40	40	40	40	40	40
40	40	40	40	40	40	40	40	40	40	40
40	40	40	38.41	40	40	40	40	40	31.8
40	40	40	40	40	40	40	40	40	31.33
40	40	40	40	40	40	40	40	40	32.91
40	40	40	40	40	40	40	40	40	31.99
40	40	40	40	40	40	40	40	40	32.9
40	40	40	40	40	40	40	40	40	34.46
40	40	40	40	40	40	40	40	40	33.72
40	40	40	40	40	40	40	40	40	33.2
40	40	40	40	40	40	40	40	40	31.24
40	40	40	40	31.76	40	40	40	40	30.5
40	40	40	40	34.47	40	37.11	40	40	36.29
40	40	40	40	40	40	37.45	40	40	31.65
40	40	40	40	40	40	40	40	40	40
40	40	40	40	40	40	40	40	40	40
40	40	40	40	40	40	40	40	40	40
40	40	40	40	40	40	40	40	40	40
40	40	40	40	40	40	40	40	40	40
40	40	40	40	40	40	40	40	40	40
40	40	40	40	40	40	40	40	40	40
40	40	40	40	40	40	40	40	40	40
40	40	40	40	40	40	40	40	40	40
40	40	40	40	40	40	40	40	40	40
40	40	40	40	40	40	40	40	40	40
40	40	40	40	40	40	40	40	40	40
40	40	40	40	40	40	40	40	40	40
40	40	40	40	40	40	40	40	40	40
40	40	40	40	40	40	40	40	40	40
40	40	40	40	40	40	40	40	40	40
40	40	40	40	40	40	40	40	40	40
40	40	40	40	40	40	40	40	40	40
40	40	40	40	40	40	40	40	40	40
40	40	40	40	40	40	40	40	40	40
40	40	40	40	40	40	40	40	40	40
40	40	40	40	40	40	40	40	40	40
40	40	40	40	40	40	40	40	40	40
40	40	40	40	40	40	40	40	40	40
40	40	40	40	40	40	40	40	40	40
40	40	40	40	40	40	40	40	40	40
40	40	40	40	40	40	40	40	40	40
40	40	40	40	40	40	40	40	40	40
40	40	40	40	40	40	40	40	40	40
40	40	40	40	40	40	40	40	40	40
40	40	40	40	40	40	40	40	40	40
40	40	40	40	40	40	40	40	40	40
40	40	40	40	40	40	40	40	40	40
40	40	40	40	40	40	40	40	40	40
40	40	40	40	40	40	40	40	40	40
40	40	40	40	40	40	40	40	40	40
40	40	40	40	40	40	40	40	40	40
40	40	40	40	40	40	40	40	40	40
40	40	40	40	40	40	40	40	40	40
40	40	40	40	40	40	40	40	40	40
40	40	40	40	40	40	40	40	40	40
40	40	40	40	40	40	40	40	40	40
40	40	40	40	40	40	40	40	40	40
40	40	40	40	40	40	40	40	40	40
40	40	40	40	40	40	40	40	40	40
40	40	40	40	40	40	40	40	40	40
40	40	40	40	40	40	40	40	40	40
40	40	40	40	40	40	40	40	40	40
40	40	40	40	40	40	40	40	40	40
40	40	40	40	40	40	40	40	40	40
40	40	40	40	40	40	40	40	40	40
40	40	40	40	40	40	40	40	40	40
40	40	40	40	40	40	40	40	40	40
40	40	40	40	40	40	40	40	40	40
40	40	40	40	40	40	40	40	40	40
40	40	40	40	40	40	40	40	40	40
40	40	40	40	40	40	40	40	40	40
40	40	40	40	40	40	40	40	40	40
40	40	40	40	40	40	40	40	40	40
40	40	40	40	40	40	40	40	40	40
40	40	40	40	40	40	40	40	40	40
40	40	40	40	40	40	40	40	40	40
40	40	40	40	40	40	40	40	40	40
40	40	40	40	40	40	40	40	40	40
40	40	40	40	40	40	40	40	40	40
40	40	40	40	40	40	40	40	40	40
40	40	40	40	40	40	40	40	40	40
40	40	40	40	40	40	40	40	40	40
40	40	40	40	40	40	40	40	40	40
40	40	40	40	40	40	40	40	40	40
40	40	40	40	40	40	40	40	40	40
40	40	40	40	40	40	40	40	40	40
40	40	40	40	40	40	40	40	40	40
40	40	40	40	40	40	40	40	40	40
40	40	40	40	40	40	40	40	40	40
40	40	40	40	40	40	40	40	40	40
40	40	40	40	40	40	40	40	40	40
40	40	40	40	40	40	40	40	40	40
40	40	40	40	40	40	40	40	40	40
40	40	40	40	40	40	40	40	40	40
40	40	40	40	40	40	40	40	40	40
40	40	40	40	40	40	40	40	40	40
40	40	40	40	40	40	40	40	40	40
40	40	40	40	40	40	40	40	40	40
40	40	40	40	40	40	40	40	40	40
40	40	40	40	40	40	40	40	40	40
40	40	40	40	40	40	40	40	40	40
40	40	40	40	40	40	40	40	40	40
40	40	40	40	40	40	40	40	40	40
40	40	40	40		40	40	40	40	40
40	40	40	40		40	40	40	40	40
40	40	40	40		40	40	40	40	40
40	40	40	40		40	40	40	40	40
40	40	40	40		40	40	40	40	40
40	40	40	40		40	40	40	40	40
40	40	40	40		40	40	40	40	40
40	40	40	40		40	40	40	40	40
40	40	40	40		40	40	40	40	40
40	40	40	40		40	40	40	40	40
40	40	40	40		40	40	40	40	40
40	40	40	40		40	40	40	40	40
40	40	40	40		40	40	40	40	40
40	40	40	40		40	40	40	40	40
40	40	40	40		40	40	40	40	40
40	40	40	40		40	40	40	40	40
40	40	40	40		40	40	40	40	40
40	40	40	40		40	40	40	40	40
40	40	40	40		40	40	40	40	40
40	40	40	40		40	40	40	40	40
40	40	40	40		40	40	40	40	40
40	40	40	40		40	40	40	40	40
40	40	40	40		40	40	40	40	40
40	40	40	40		40	40	40	40	40
40	40	40	40		40	40	40	40	40
40	40	40	40		40	40	40	40	40
40	40	40	40		40	40	40	40	40
40	40	40	40		40	40	40	40	40
40	40	40	40		40	40	40	40	40
40	40	40	40		40	40	40	40	40
40	40	40	40		40	40	40	40	40
40	40	40	40		40	40	40	40	40
40	40	40	40		40	40	40	40	40
40	40	40	40		40	40	40	40	40
40	40	40	40		40	40	40	40	40
40	40	40	40		40	40	40	40	40
40	40	40	40		40	40	40	40	40
40	40	40	40		40	40	40	40	40
40	40	40	40		40	40	40	40	40
40	40	40	40		40	40	40	40	40
40	40	40	40		40	40	40	40	40
40	40	40	40		40	40	40	40	40
40	40	40	40		40	40	40	40	40
40	40	40	40		40	40	40	40	40
40	40	40	40		40	40	40	40	40
40	40	40	40		40	40	40	40	40
40	40	40	40		40	40	40	40	40
40	40	40	40		40	40	40	40	40
40	40	40	40		40	40	40	40	40
40	40	40	40		40	40	40	40	40
40	40	40	40		40	40	40	40	40
40	40	40	40		40	40	40	40	40
40	40	40	40		40	40	40	40	40
40	40	40	40		40	40	40	40	40
40	40	40	40		40	40	40	40	40
40	40	40	40		40	40	40	40	40
40	40	40	40		40	40	40	40	40
40	40	40	40		40	40	40	40	40
40	40	40	40		40	40	40	40	40
40	40	40	40		40	40	40	40	40
40	40	40	40		40	40	40	40	40
40	40	40	40		40	40	40	40	40
40	40	40	40		40	40	40	40	40
40	40	40	40		40	40	40	40	40
40	40	40	40		40	40	40	40	40
40	40	40	40		40	40	40	40	40
40	40	40	40		40	40	40	40	40
40	40	40	40		40	40	40	40	40
40	40	40	40		40	40	40	40	40
40	40	40	40		40	40	40	40	40
40	40	40	40		40	40	40	40	40
40	40	40	40		40	40	40	40	40
40	40	40	40		40	40	40	40	40
40	40	40	40		40	40	40	40	40
40	40	40	40		40	40	40	40	40
40	40	40	40		40	40	40	40	40
40	40	40	40		40	40	40	40	40
40	40	40	40		40	40	40	40	40
40	40	40	40		40	40	40	40	40
40	40	40	40		40	40	40	40	40
40	40	40	40		40	40	40	40	40
40	40	40	40		40	40	40	40	40
40	40	40	40		40	40	40	40	40
40	40	40	40		40	40	40	40	40
40	40	40	40		40	40	40	40	40
40	40	40	40		40	40	40	40	40
40	40	40	40		40	40	40	40	40
40	40	40	40		40	40	40	40	40
40	40	40	40		40	40	40	40	40
40	40	40	40		40	40	40	40	40
40	40	40	40		40	40	40	40	40
40	40	40	40		40	40	40	40	40
40	40	40	40		40	40	40	40	40
40	40	40	40		40	40	40	40	40
40	40	40	40		40	40	40	40	40
40	40	40	40		40	40	40	40	40
40	40	40	40		40	40	40	40	40
40	40	40	40		40	40	40	40	40
40	40	40	40		40	40	40	40	40
40	40	40	40		40	40	40	40	40
40	40	40	40		40	40	40	40	40
40	40	40	40		40	40	40	40	40
40	40	40	40		40	40	40	40	40
40	40	40	40		40	40	40	40	40
40	40	40	40		40	40	40	40	40
40	40	40	40		40	40	40	40	40
40	40	40	40		40	40	40	40	40
40	40	40	40		40	40	40	40	40
40	40	40	40		40	40	40	40	40
40	40	40	40		40	40	40	40	40
40	40	40	40		40	40	40	40	40
40	40	40	40		40	40	40	40	40
40	40	40	40		40	40	40	40	40
40	40	40	40		40	40	40	40	40
40	40	40	40		40	40	40	40	40
40	40	40	40		40	40	40	40	40
40	40	40	40		40	40	40	40	40
40	40	40	40		40	40	40	40	40
40	40	40	40		40	40	40	40	40
40	40	40	40		40	40	40	40	40
40	40	40	40		40	40	40	40	40
40	40	40	40		40	40	40	40	40
40	40	40	40		40	40	40	40	40
40	40	40	40		40	40	40	40	40
40	40	40	40		40	40	40	40	40
40	40	40	40		40	40	40	40	40
40	40	40	40		40	40	40	40	40
40	40	40	40		40	40	40	40	40
40	40	40	40		40	40	40	40	40
40	40	40	40		40	40	40	40	40
40	40	40	40		40	40	40	40	40
40	40	40	40		40	40	40	40	40
40	40	40	40		40	40	40	40	40
40	40	40	40		40	40	40	40	40
40	40	40	40		40	40	40	40	40
40	40	40	40		40	40	40	40	40
40	40	40	40		40	40	40	40	40
40	40	40	40		40	40	40	40	40
40	40	40	40		40	40	40	40	40
40	40	40	40		40	40	40	40	40
40	40	40	40		40	40	40	40	40
40	40	40	40		40	40	40	40	40
40	40	40	40		40	40	40	40	40
40	40	40	40		40	40	40	40	40
40	40	40	40		40	40	40	40	40
40	40	40	40		40	40	40	40	40
40	40	40	40		40	40	40	40	40
40	40	40	40		40	40	40	40	40
40	40	40	40		40	40	40	40	40
40	40	40	40		40	40	40	40	40
40	40	40	40		40	40	40	40	40
40	40	40	40		40	40	40	40	40
40	40	40	40		40	40	40	40	40
40	40	40	40		40	40	40	40	40
40	40	40	40		40	40	40	40	40
40	40	40	40		40	40	40	40	40
40	40	40	40		40	40	40	40	40
40	40	40	40		40	40	40	40	40
40	40	40	40		40	40	40	40	40
40	40	40	40		40	40	40	40	40
40	40	40	40		40	40	40	40	40
40	40	40	40		40	40	40	40	40
40	40	40	40		40	40	40	40	40
40	40	40	40		40	40	40	40	40
40	40	40	40		40	40	40	40	40
40	40	40	40		40	40	40	40	40
40	40	40	40		40	40	40	40	40
40	40	40	40		40	40	40	40	40
40	40	40	40		40	40	40	40	40
40	40	40	40		40	40	40	40	40
40	40	40	40		40	40	40	40	40
40	40	40	40		40	40	40	40	40
40	40	40	40		40	40	40	40	40
40	40	40	40		40	40	40	40	40
40	40	40	40		40	40	40	40	40
40	40	40	40		40	40	40	40	40
40	40	40	40		40	40	40	40	40
40	40	40	40		40	40	40	40	40
40	40	40	40		40	40	40	40	40
40	40	40	40		40	40	40	40	40
40	40	40	40		40	40	40	40	40
40	40	40	40		40	40	40	40	40
40	40	40	40		40	40	40	40	40
40	40	40	40		40	40	40	40	40
40	40	40			40	40	40	40	40
40	40	40			40	40	40	40	40
40	40	40			40	40	40	40	40
40	40	40			40	40	40	40	40
40	40	40			40	40	40	40	40
40	40	40			40	40	40	40	40
40	40	40			40	40	40	40	40
40	40	40			40	40	40	40	40
40	40	40			40	40	40	40	40
40	40	40			40	40	40	40	40
40	40	40			40	40	40	40	40
40	40	40			40	40	40	40	40
40	40	40			40	40	40	40	40
40	40	40			40	40	40	40	40
40	40	40			40	40	40	40	40
40	40	40			40	40	40	40	40
40	40	40			40	40	40	40	40
40	40	40			40	40	40	40	40
40	40	40			40	40	40	40	40
40	40	40			40	40	40	40	40
40	40	40			40	40	40	40	40
40	40	40			40	40	40	40	40
40	40	40			40	40	40	40	40
40	40	40			40	40	40	40	40
40	40	40			40	40	40	40	40
40	40	40			40	40	40	40	40
40	40	40			40	40	40	40	40
40	40	40			40	40	40	40	40
40	40	40			40	40	40	40	40
40	40	40			40	40	40	40	40
40	40	40			40	40	40	40	40
40	40	40			40	40	40	40	40
40	40	40			40	40	40	40	40
40	40	40			40	40	40	40	40
40	40	40			40	40	40	40	40
40	40	40			40	40	40	40	40
40	40	40			40	40	40	40	40
40	40	40			40	40	40	40	40
40	40	40			40	40	40	40	40
40	40	40			40	40	40	40	40
40	40	40			40	40	40	40	40
40	40	40			40	40	40	40	40
40	40	40			40	40	40	40	40
40	40	40			40	40	40	40	40
40	40	40			40	40	40	40	40
40	40	40			40	40	40	40	40
40	40	40			40	40	40	40	40
40		40			40	40	40	40	40
40		40			40	40	40	40	40
40		40			40	40	40	40	40
40		40			40	40	40	40	40
40		40			40	40	40	40	40
40		40			40	40	40	40	40
40		40			40	40	40	40	40
40		40			40	40	40	40	40
40		40			40	40	40	40	40
40		40			40	40	40	40	40
40		40			40	40	40	40	40
40		40			40	40	40	40	40
40		40			40	40	40	40	40
40		40			40	40	40	40	40
40		40			40	40	40	40	40
40		40			40	40	40	40	40
40		40			40	40	40	40	40
40		40			40	40	40	40	40
40		40			40	40	40	40	40
40		40			40	40	40	40	40
40		40			40	40	40	40	40
40		40			40	40	40	40	40
40		40			40	40	40	40	40
40		40			40	40	40	40	40
40		40			40	40	40	40	40
40		40			40	40	40	40	40
40		40			40	40	40	40	40
40		40			40	40	40	40	40
40		40			40	40	40	40	40
40		40			40	40	40	40	40
40		40			40	40	40	40	40
40		40			40	40	40	40	40
40		40			40	40	40	40	40
40		40			40	40	40	40	40
40		40			40	40	40	40	40
40		40			40	40	40	40	40
40		40			40	40	40	40	40
40		40			40	40	40	40	40
40		40			40	40	40	40	40
40		40			40	40	40	40	40
40		40			40	40	40	40	40
40		40			40	40	40	40	40

## Sheet: P12
reactions for which a Ct value is not obtained are set at "40"
June	July	August	September	October	November	December
40	31.02	40	31.54	40	40	40
40	40	40	40	40	40	40
40	40	40	40	40	40	40
40	40	40	40	40	40	40
40	40	40	40	40	40	40
40	40	40	40	40	40	40
40	40	40	40	40	40	40
40	40	31.18	40	40	40	40
40	40	40	40	40	40	40
40	40	31.08	40	40	40	40
40			40	40	40	40
40			40	40	40	40
40			40	40	40	40
40			40	40	40	40
40			40	40	40	40
40			40	40	40	40
40			40	40	40	40
40			40	40	40	40
40			40	40	40	40
40			40	40	40	40
40			40	40	40	40
40			40	40	40	40
40			40	40	40	40
40			40	40	40	40
40			40	40	40	40
40			40	40	40	40
40			40	40	40	40
40			40	40	40	40
40			40	40	40	40
40			40	40	40	40
40			40	40	40	40
40			40	40	40	40
40			40	40	40	40
40			40	40	40	40
40			40	40	40	40
40			40	40	40	40
40			40	40	40	40
40			40	40	40	40
40			40	40	40	40
40			40	40	40	40
40			40	40	40	40
40			40	40	40	40
40			40	40	40	40
40			40	40	40	40
40			40	40	40	40
40			40	40	40	40
40			40	40	40	40
40			40	40	40	40
40			40	40	40	40
40			40	40	40	40
40			40	40	40	40
40			40	40	40	40
40			40	40	40	40
40			40	40	40	40
40			40	40	40	40
40			40	40	40	40
40			40	40	40	40
40			40	40	40	40
40			40	40	40	40
40			40	40	40	40
40			40	40	40	40
40			40	40	40	40
40			40	40	40	40
40			40	40	40	40
40			40	40	40	40
40			40	40	40	40
40			40	40	40	40
40			40	40	40	40
40			40	40	40	40
40			40	40	40	40
40			40	40	40	40
40			40	40	40	40
40			40	40	40	40
40			40	40	40	40
40			40	40	40	40
40			40	40	40	40
40			40	40	40	40
40			40	40	40	40
40			40	40	40	40
40			40	40	40	40
40			40	40	40	40
40			40	40	40	40
40			40	40	40	40
40			40	40	40	40
40			40	40	40	40
40			40	40	40	40
40			40	40	40	40
40			40	40	40	40
40			40	40	40	40
40			40	40	40	40
40			40	40	40	40
40			40	40	40	40
40			40	40	40	40
40			40	40	40	40
40			40	40	40	40
40			40	40	40	40
40			40	40	40	40
40			40	40	40	40
40			40	40	40	40
40			40	40	40	40
40			40	40	40	40
40			40	40	40	40
40			40	40	40	40
40			40	40	40	40
40			40	40	40	40
40			40	40	40	40
40			40	40	40	40
40			40	40	40	40
40			40	40	40	40
40			40	40	40	40
40			40	40	40	40
40				40	40	40
40				40	40	40
40				40	40	40
40				40	40	40
40				40	40	40
40				40	40	40
40				40	40	40
40				40	40	40
40				40	40	40
40				40	40	40
40				40	40	40
40				40	40	40
40				40	40	40
40				40	40	40
40				40	40	40
40				40	40	40
40				40	40	40
40				40	40	40
40				40	40	40
40				40	40	40
40				40	40	40
40				40	40	40
40				40	40	40
40				40	40	40
40				40	40	40
40				40	40	40
40				40	40	40
40				40	40	40
40				40	40	40
40				40	40	40
40				40	40	40
40				40	40	40
40				40	40	40
40				40	40	40
40				40	40	40
40				40	40	40
40				40	40	40
40				40	40	40
40				40	40	40
40				40	40	40
40				40	40	40
40				40	40	40
40				40	40	40
40				40	40	40
40				40	40	40
40				40	40	40
40				40	40	40
40				40	40	40
40				40	40	40
40				40	40	40
40				40	40	40
40				40	40	40
40				40	40	40
40				40	40	40
40				40	40	40
40				40	40	40
40				40	40	40
40				40	40	40
40				40	40	40
40				40	40	40
40				40	40	40
40				40	40	40
40				40	40	40
40				40	40	40
40				40	40	40
40				40	40	40
40				40	40	40
40				40	40	40
40				40	40	40
40				40	40	40
40				40	40	40
40				40	40	40
40				40	40	40
40				40	40	40
40				40	40	40
40				40	40	40
40				40	40	40
40				40	40	40
40				40	40	40
40				40	40	40
40				40	40	40
40				40	40	40
40				40	40	40
40				40	40	40
40				40	40	40
40				40	40	40
40				40	40	40
40				40	40	40
40				40	40	40
40				40	40	40
40				40	40	40
40				40	40	40
40				40	40	40
40				40	40	40
40				40	40	40
40				40	40	40
40				40	40	40
40				40	40	40
40				40	40	40
40				40	40	40
40				40	40	40
40				40	40	40
40				40	40	40
40				40	40	40
40				40	40	40
40				40	40	40
40				40	40	40
40				40	40	40
40				40	40	40
40				40	40	40
40				40	40	40
40				40	40	40
40				40	40	40
40				40	40	40
40				40	40	40
40				40	40	40
40				40	40	40
40				40	40	40
40				40	40	40
40				40	40	40
40				40	40	40
40				40	40	40
40				40	40	40
40				40	40	40
40				40	40	40
40				40	40	40
40				40	40	40
40				40	40	40
40				40	40	40
40				40	40	40
40				40	40	40
40				40	40	40
40				40	40	40
40				40	40	40
40				40	40	40
40				40	40	40
40				40	40	40
40				40	40	40
40				40	40	40
40				40	40	40
40				40	40	40
40				40	40	40
40				40	40	40
40				40	40	40
40				40	40	40
40				40	40	40
40				40	40	40
40				40	40	40
40				40	40	40
40				40	40	40
40				40	40	40
40				40	40	40
40				40	40	40
40				40	40	40
40				40	40	40
40				40	40	40
40				40	40	40
40				40	40	40
40				40	40	40
40				40	40	40
40				40	40	40
40				40	40	40
40				40	40	40
40				40	40	40
40				40	40	40
40				40	40	40
40				40	40	40
40				40	40	40
40				40	40	40
40				40	40	40
40				40	40	40
40				40	40	40
40				40	40	40
40				40	40	40
40				40	40	40
40				40	40	40
40				40	40	40
40				40	40	40
40				40	40	40
40				40	40	40
40				40	40	40
40				40	40	40
40				40	40	40
40				40	40	40
40				40	40	40
40				40	40	40
40				40	40	40
40				40	40	40
40				40	40	40
40				40	40	40
40				40	40	40
40				40	40	40
40				40	40	40
40				40	40	40
40				40	40	40
40				40	40	40
40				40	40	40
40				40	40	40
40				40	40	40
40				40	40	40
40				40	40	40
40				40	40	40
40				40	40	40
40				40	40	40
40				40	40	40
40				40	40	40
40				40	40	40
40				40	40	40
40				40	40	40
40				40	40	40
40				40	40	40
40				40	40	40
40				40	40	40
40				40	40	40
40				40	40	40
40				40	40	40
40				40	40	40
40				40	40	40
40				40	40	40
40				40	40	40
40				40	40	40
40				40	40	40
40				40	40	40
40				40	40	40
40				40	40	40
40				40	40	40
40				40	40	40
40				40	40	40
40				40	40	40
40				40	40	40
40				40	40	40
40				40	40	40
40				40	40	40
40				40	40	40
40				40	40	40
40				40	40	40
40				40	40	40
40				40	40	40
40				40	40	40
40				40	40	40
40				40	40	40
40				40	40	40
40				40	40	40
40				40	40	40
40				40	40	40
40				40	40	40
40				40	40	40
40				40	40	40
40				40	40	40
40				40	40	40
40				40	40	40
40				40	40	40
40				40	40	40
40				40	40	40
40				40	40	40
40				40	40	40
40				40	40	40
40				40	40	40
40				40	40	40
40				40	40	40
40				40	40	40
40				40	40	40
40				40	40	40
40				40	40	40
40				40	40	40
40				40	40	40
40				40	40	40
40				40	40	40
40				40	40	40
40				40	40	40
40				40	40	40
40				40	40	40
40				40	40	40

## Sheet: P4
reactions for which a Ct value is not obtained are set at "40"
June	July	August
40	32.46	40
40	29.45	30.85
40	33.86	40
40	31.82	29.31
40	33.26	32.57
40	34.66	40
40	30.49	40
40	40	40
40	40	40
40	40	40
40
40
40
40
40
40
40
40
40
40
40
40
40
40
40
40
40
40
40
40
40
40
40
40
40
40
40
40
40
40
40
40
40
40
40
40
40
40
40
40
40
40
40
40
40
40
40
40
40
40
40
40
40
40
40
40
40
40
40
40
40
40
40
40
40
40
40
40
40
40
40
40
40
40
40
40
40
40
40
40
40
40
40
40
40
40
40
40
40
40
40
40
40
40
40
40
40
40
40
40
40
40
40
40
40
40
40
40
40
40
40
40
40
40
40
40
40
40
40
40
40
40
40
40
40
40
40
40
40
40
40
40
40
40
40
40
40
40
40
40
40
40
40
40
40
40
40
40
40
40
40
40
40
40
40
40
40
40
40
40
40
40
40
40
40
40
40
40
40
40
40
40
40
40
40
40
40
40
40
40
40
40
40
40
40
40
40
40
40
40
40
40
40
40
40
40
40
40
40
40
40
40
40
40
40
40
40
40
40
40
40
40
40
40
40
40
40
40
40
40
40
40
40
40
40
40
40
40
40
40
40
40
40
40
40
40
40
40
40
40
40
40
40
40
40
40
40
40
40
40
40
40
40
40
40
40
40
40
40
40
40
40
40
40
40
40
40
40
40
40
40
40
40
40
40
40
40
40
40
40
40
40
40
40
40
40
40
40
40
40
40
40
40
40
40
40
40
40
40
40
40
40
40
40
40
40
40
40
40
40
40
40
40
40
40
40
40
40
40
40
40
40
40
40
40
40
40
40
40
40
40
40
40
40
40
40
40
40
40
40
40
40
40
40
40
40
40
40
40
40
40
40
40
40
40
40
40
40
40
40
40
40
40
40
40
40
40
40
40
40
40
40
40
40

## Sheet: P6
reactions for which a Ct value is not obtained are set at "40"
June	July	August	September	October	November	December	January	February	March	April	May
29.06	33.15	34.71	32.39	40	40	36.37	33.7	40	36.57	40	40
40	34.1	40	30	40	40	40	40	40	32.45	40	40
40	35.02	40	40	40	40	40	40	40	40	40	40
40	30.28	40	40	40	40	40	40	40	40	40	40
40	36.01	40	40	40	40	40	40	40	40	40	40
40	33.49	40	40	40	40	40	40	40	40	40	40
40	34.22	40	40	40	40	40	40	40	40	40	40
40	32.4	40	40	40	40	40	40	40	40	40	40
40	34.33	40	40	40	40	40	40	40	40	40	40
40	40	40	40	40	40	40	40	40	40	40	40
40	40	30.83	40	40	40	40		40		36.83	33.33
40	40	33.02	40	40	40	40		40		32.96	36.46
40	40	40	40	40	40	40		40		35.46	35.32
40	40	40	40	40	40	40		40		31.13	34.22
40	40	40	40	40	40	40		40		37.38	35.96
40	40	40	40	40	40	40		40		33.53	31.31
40	40	40	40	40	40	40		40		32.63	30.6
40	40	40	40	40	40	40		40		32.36	31.64
40	40	40	40	40	40	40		40		33.31	37.05
40	40	40	40	40	40	40		40		32.2	34.5
40	40		40	35.62	30.47			34.08		35.74	36.06
40	40		40	33.45	37.17			33.1		33.17	32.97
40	40		40	33.62	29.11			40		34.57	32.91
40	40		40	37.67	35.53			40		34.39	33.06
40	40		40	40	34.28			40		36.45	40
40	40		40	40	40			40		33.01	40
40	40		40	40	40			40		32.48	40
40	40		40	40	40			40		33.24	40
40	40		40	40	40			40		32.99	40
40	40		40	40	40			40		34.38	40
40	40		40	40	40			40		33.14	40
40	40		40	40	40			40		34.11	40
40	40		40	40	40			40		35.89	40
40	40		40	40	40			40		34.57	40
40	40		40	40	40			40		33.16	40
40	40		40	40	40			40		31.55	40
40	40		40	40	40			40		31.27	40
40	40		40	40	40			40		34.53	40
40	40		40	40	40			40		36.82	40
40	40		40	40	40			40		40	40
40	40		40	40	40			40		40	40
40	40		40	40	40			40		40	40
40	40		40	40	40			40		40	40
40	40		40	40	40			40		40	40
40	40		40	40	40			40		40	40
40	40		40	40	40			40		40	40
40	40		40	40	40			40		40	40
40	40		40	40	40			40		40	40
40	40		40	40	40			40		40	40
40	40		40	40	40			40		40	40
40	40		40	40	40			40		40	40
40	40		40	40	40			40		40	40
40	40		40	40	40			40		40	40
40	40		40	40	40			40		40	40
40	40		40	40	40			40		40	40
40	40		40	40	40			40		40	40
40	40		40	40	40			40		40	40
40	40		40	40	40			40		40	40
40	40		40	40	40			40		40	40
40	40		40	40	40			40		40	40
40	40		40	40	40			40		40	40
40	40		40	40	40			40		40	40
40	40		40	40	40			40		40	40
40	40		40	40	40			40		40	40
40	40		40	40	40			40		40	40
40	40		40	40	40			40		40	40
40	40		40	40	40			40		40	40
40	40		40	40	40			40		40	40
40	40		40	40	40			40		40	40
40	40		40	40	40			40		40	40
40	40		40	40	40			40		40	40
40	40		40	40	40			40		40	40
40	40		40	40	40			40		40	40
40	40		40	40	40			40		40	40
40	40		40	40	40			40		40	40
40	40		40	40	40			40		40	40
40	40		40	40	40			40		40	40
40	40		40	40	40			40		40	40
40	40		40	40	40			40		40	40
40	40		40	40	40			40		40	40
40	40		40	40	40			40		40	40
40	40		40	40	40			40		40	40
40	40		40	40	40			40		40	40
40	40		40	40	40			40		40	40
40	40		40	40	40			40		40	40
40	40		40	40	40			40		40	40
40	40		40	40	40			40		40	40
40	40		40	40	40			40		40	40
40	40		40	40	40			40		40	40
40	40		40	40	40			40		40	40
40	40		40	40	40			40		40	40
40	40		40	40	40			40		40	40
40	40		40	40	40			40		40	40
40	40		40	40	40			40		40	40
40	40		40	40	40			40		40	40
40	40		40	40	40			40		40	40
40	40		40	40	40			40		40	40
40	40		40	40	40			40		40	40
40	40		40	40	40			40		40	40
40	40		40	40	40			40		40	40
40	40		40	40	40			40		40	40
40	40		40	40	40			40		40	40
40	40		40	40	40			40		40	40
40	40		40	40	40			40		40	40
40	40		40	40	40			40		40	40
40	40		40	40	40			40		40	40
40	40		40	40	40			40		40	40
40	40		40	40	40			40		40	40
40	40		40	40	40			40		40	40
40	40		40	40	40			40		40	40
40	40		40	40	40			40		40	40
40	40		40	40	40			40		40	40
								35.21		40	40
								33.46		40	40
								35.36		40	40
								30.49		40	40
								35.21		40	40
								35.13		40	40
								36.42		40	40
								33.37		40	40
								35.24		40	40
								34.28		40	40
								31.71		40	40
								40		40	40
								40		40	40
								40		40	40
								40		40	40
								40		40	40
								40		40	40
								40		40	40
								40		40	40
								40		40	40
								40		40	40
								40		40	40
								40		40	40
								40		40	40
								40		40	40
								40		40	40
								40		40	40
								40		40	40
								40		40	40
								40		40	40
								40		40	40
								40		40	40
								40		40	40
								40		40	40
								40		40	40
								40		40	40
								40		40	40
								40		40	40
								40		40	40
								40		40	40
								40		40	40
								40		40	40
								40		40	40
								40		40	40
								40		40	40
								40		40	40
								40		40	40
								40		40	40
								40		40	40
								40		40	40
								40		40	40
								40		40	40
								40		40	40
								40		40	40
								40		40	40
								40		40	40
								40		40	40
								40		40	40
								40		40	40
								40		40	40
								40		40	40
								40		40	40
								40		40	40
								40		40	40
								40		40	40
								40		40	40
								40		40	40
								40		40	40
								40		40	40
								40		40	40
								40		40	40
								40		40	40
								40		40	40
								40		40	40
								40		40	40
								40		40	40
								40		40	40
								40		40	40
								40		40	40
								40		40	40
								40		40	40
								40		40	40
								40		40	40
								40		40	40
								40		40	40
								40		40	40
								40		40	40
								40		40	40
								40		40	40
								40		40	40
								40		40	40
								40		40	40
								35.22		40	40
								32.31		40	40
								35.24		40	40
								33.56		40	40
								36.24		40	40
								40		40	40
								40		40	40
								40		40	40
								40		40	40
								40		40	40
								40		40	40
								40		40	40
								40		40	40
								40		40	40
								40		40	40
								40		40	40
								40		40	40
								40		40	40
								40		40	40
								40		40	40
								40		40	40
								40		40	40
								40		40	40
								40		40	40
								40		40	40
								40		40	40
								40		40	40
								40		40	40
								40		40	40
								40		40	40
								40		40	40
								40		40	40
								40		40	40
								40		40	40
								40		40	40
								40		40	40
								40		40	40
								40		40	40
								40		40	40
								40		40	40
								40		40	40
								40		40	40
								40		40	40
								40		40	40
								40		40	40
								40		40	40
								40		40	40
								40		40	40
								40		40	40
								40		40	40
								40		40	40
								40		40	40
								40		40	40
								40		40	40
								40		40	40
								40		40	40
								40		40	40
								40		40	40
								40		40	40
								40		40	40
								40		40	40
								40		40	40
								40		40	40
								40		40	40
								40		40	40
								40		40	40
								40		40	40
								40		40	40
								40		40	40
								40		40	40
								40		40	40
								40		40	40
								40		40	40
								40		40	40
								40		40	40
								40		40	40
								40		40	40
								40		40	40
								40		40	40
								40		40	40
								40		40	40
								40		40	40
								40		40	40
								40		40	40
								40		40	40
								40		40	40
								40		40	40
								40		40	40
								40		40	40
								40		40	40
								40		40	40
								40		40	40
								32.55		40	40
								34.79		40	40
								36.73		40	40
								31.31		40	40
								32.17		40	40
								32.65		40	40
								33.98		40	40
								30.75		40	40
								30.63		40	40
								38.64		40	40
								34.92		40	40
								33.72		40	40
								40		40	40
								40		40	40
								40		40	40
								40		40	40
								40		40	40
								40		40	40
								40		40	40
								40		40	40
								40		40	40
								40		40	40
								40		40	40
								40		40	40
								40		40	40
								40		40	40
								40		40	40
								40		40	40
								40		40	40
								40		40	40
								40		40	40
								40		40	40
								40		40	40
								40		40	40
								40		40	40
								40		40	40
								40		40	40
								40		40	40
								40		40	40
								40		40	40
								40		40	40
								40		40	40
								40		40	40
								40		40	40
								40		40	40
								40		40	40
								40		40	40
								40		40	40
								40		40	40
								40		40	40
								40		40	40
								40		40	40
								40		40	40
								40		40	40
								40		40	40
								40		40	40
								40		40	40
								40		40	40
								40		40	40
								40		40	40
								40		40	40
								40		40	40
								40		40	40
								40		40	40
								40		40	40
								40		40	40
								40		40	40
								40		40	40
								40		40	40
								40		40	40
								40		40	40
								40		40	40
								40		40	40
								40		40	40
								40		40	40
								40		40	40
								40		40	40
								40		40	40
								40		40	40
								40		40	40
								40		40	40
								40		40	40
								40		40	40
								40		40	40
								40		40	40
								40		40	40
								40		40	40
								40		40	40

## Sheet: P9
reactions for which a Ct value is not obtained are set at "40"
June	July	August	September	October	November	December	January	February	March	April	May
36.98	32.43	40	36.57	40	40	40	40	40	40	40	40
40	31.11	40	40	40	40	40	40	40	40	40	40
40	40	40	40	40	40	40	40	40	40	40	40
40	40	40	40	40	40	40	40	40	40	40	40
40	40	40	40	40	40	40	40	40	40	40	40
40	40	31.89	40	40	40	40	40	40	40	40	40
40	40	40	40	40	40	40	40	40	40	40	40
40	40	40	40	40	40	40	40	40	40	40	40
40	40	29.48	40	40	40	40	40	40	40	40	40
40	40	40	40	40	40	40	40	40	40	40	40
40			40	40	40	40	40	40	40	40	40
40			40	40	40	40	40	40	40	40	40
40			40	40	40	40	40	40	40	40	40
40			40	40	40	40	40	40	40	40	40
40			40	40	40	40	40	40	40	40	40
40			40	40	40	40	40	40	40	40	40
40			40	40	40	40	40	40	40	40	40
40			40	40	40	40	40	40	40	40	40
40			40	40	40	40	40	40	40	40	40
40			40	40	40	40	40	40	40	40	40
40				40	40	40	40	40	40	40	40
40				40	40	40	40	40	40	40	35.64
40				40	40	40	40	40	40	40	40
40				40	40	40	40	40	40	40	40
40				40	40	40	40	40	40	40	40
40				40	40	40	40	40	40	40	40
40				40	40	40	40	40	40	40	40
40				40	40	40	40	40	40	40	40
40				40	40	40	40	40	40	40	40
40				40	40	40	40	40	40	40	40
40				40	40	40	40	40	40	40	40
40				40	40	40	40	40	40	40	40
40				40	40	40	40	40	40	40	40
40				40	40	40	40	40	40	40	40
40				40	40	40	40	40	40	40	40
40				40	40	40	40	40	40	40	40
40				40	40	40	40	40	40	40	40
40				40	40	40	40	40	40	40	40
40				40	40	40	40	40	40	40	40
40				40	40	40	40	40	40	40	40
40				40	40	40	40	40	40	40	40
40				40	40	40	40	40	40	40	40
40				40	40	40	40	40	40	40	40
40				40	40	40	40	40	40	40	40
40				40	40	40	40	40	40	40	40
40				40	40	40	40	40	40	40	40
40				40	40	40	40	40	40	40	40
40				40	40	40	40	40	40	40	40
40				40	40	40	40	40	40	40	40
40				40	40	40	40	40	40	40	40
40				40	40	40	40	40	40	40	40
40				40	40	40	40	40	40	40	40
40				40	40	40	40	40	40	40	40
40				40	40	40	40	40	40	40	40
40				40	40	40	40	40	40	40	40
40				40	40	40	40	40	40	40	40
40				40	40	40	40	40	40	40	40
40				40	40	40	40	40	40	40	40
40				40	40	40	40	40	40	40	40
40				40	40	40	40	40	40	40	40
40				40	40	40	40	40	40	40	40
40				40	40	40	40	40	40	40	40
40				40	40	40	40	40	40	40	40
40				40	40	40	40	40	40	40	40
40				40	40	40	40	40	40	40	40
40				40	40	40	40	40	40	40	40
40				40	40	40	40	40	40	40	40
40				40	40	40	40	40	40	40	40
40				40	40	40	40	40	40	40	40
40				40	40	40	40	40	40	40	40
40				40	40	40	40	40	40	40	40
40				40	40	40	40	40	40	40	40
40				40	40	40	40	40	40	40	40
40				40	40	40	40	40	40	40	40
40				40	40	40	40	40	40	40	40
40				40	40	40	40	40	40	40	40
40				40	40	40	40	40	40	40	40
40				40	40	40	40	40	40	40	40
40				40	40	40	40	40	40	40	40
40				40	40	40	40	40	40	40	40
40				40	40	40	40	40	40	40	40
40				40	40	40	40	40	40	40	40
40				40	40	40	40	40	40	40	40
40				40	40	40	40	40	40	40	40
40				40	40	40	40	40	40	40	40
40				40	40	40	40	40	40	40	40
40				40	40	40	40	40	40	40	40
40				40	40	40	40	40	40	40	40
40				40	40	40	40	40	40	40	40
40				40	40	40	40	40	40	40	40
40				40	40	40	40	40	40	40	40
40				40	40	40	40	40	40	40	40
40				40	40	40	40	40	40	40	40
40				40	40	40	40	40	40	40	40
40				40	40	40	40	40	40	40	40
40				40	40	40	40	40	40	40	40
40				40	40	40	40	40	40	40	40
40				40	40	40	40	40	40	40	40
40				40	40	40	40	40	40	40	40
40				40	40	40	40	40	40	40	40
40				40	40	40	40	40	40	40	40
40				40	40	40	40	40	40	40	40
40				40	40	40	40	40	40	40	40
40				40	40	40	40	40	40	40	40
40				40	40	40	40	40	40	40	40
40				40	40	40	40	40	40	40	40
40				40	40	40	40	40	40	40	40
40				40	40	40	40	40	40	40	40
40				40	40	40	40	40	40	40	40
40				40	40	40	40	40	40	40	40
40				40	40	40	40	40	40	40	40
40				40	40	40	40	40	40	40	40
				40	40	40	40	40	40	40	40
				40	40	40	40	40	40	40	40
				40	40	40	40	40	40	40	40
				40	40	40	40	40	40	40	40
				40	40	40	40	40	40	40	40
				40	40	40	40	40	40	40	40
				40	40	40	40	40	40	40	40
				40	40	40	40	40	40	40	40
				40	40	40	40	40	40	40	40
				40	40	40	40	40	40	40	40
				40	40	40	40	40	40	40	40
				40	40	40	40	40	40	40	40
				40	40	40	40	40	40	40	40
				40	40	40	40	40	40	40	40
				40	40	40	40	40	40	40	40
				40	40	40	40	40	40	40	40
				40	40	40	40	40	40	40	40
				40	40	40	40	40	40	40	40
				40	40	40	40	40	40	40	40
				40	40	40	40	40	40	40	40
				40	40	40	40	40	40	40	40
				40	40	40	40	40	40	40	40
				40	40	40	40	40	40	40	40
				40	40	40	40	40	40	40	40
				40	40	40	40	40	40	40	40
				40	40	40	40	40	40	40	40
				40	40	40	40	40	40	40	40
				40	40	40	40	40	40	40	40
				40	40	40	40	40	40	40	40
				40	40	40	40	40	40	40	40
				40	40	40	40	40	40	40	40
				40	40	40	40	40	40	40	40
				40	40	40	40	40	40	40	40
				40	40	40	40	40	40	40	40
				40	40	40	40	40	40	40	40
				40	40	40	40	40	40	40	40
				40	40	40	40	40	40	40	40
				40	40	40	40	40	40	40	40
				40	40	40	40	40	40	40	40
				40	40	40	40	40	40	40	40
				40	40	40	40	40	40	40	40
				40	40	40	40	40	40	40	40
				40	40	40	40	40	40	40	40
				40	40	40	40	40	40	40	40
				40	40	40	40	40	40	40	40
				40	40	40	40	40	40	40	40
				40	40	40	40	40	40	40	40
				40	40	40	40	40	40	40	40
				40	40	40	40	40	40	40	40
				40	40	40	40	40	40	40	40
				40	40	40	40	40	40	40	40
				40	40	40	40	40	40	40	40
				40	40	40	40	40	40	40	40
				40	40	40	40	40	40	40	40
				40	40	40	40	40	40	40	40
				40	40	40	40	40	40	40	40
				40	40	40	40	40	40	40	40
				40	40	40	40	40	40	40	40
				40	40	40	40	40	40	40	40
				40	40	40	40	40	40	40	40
				40	40	40	40	40	40	40	40
				40	40	40	40	40	40	40	40
				40	40	40	40	40	40	40	40
				40	40	40	40	40	40	40	40
				40	40	40	40	40	40	40	40
				40	40	40	40	40	40	40	40
				40	40	40	40	40	40	40	40
				40	40	40	40	40	40	40	40
				40	40	40	40	40	40	40	40
				40	40	40	40	40	40	40	40
				40	40	40	40	40	40	40	40
				40	40	40	40	40	40	40	40
				40	40	40	40	40	40	40	40
				40	40	40	40	40	40	40	40
				40	40	40	40	40	40	40	40
				40	40	40	40	40	40	40	40
				40	40	40	40	40	40	40	40
				40	40	40	40	40	40	40	40
				40	40	40	40	40	40	40	40
				40	40	40	40	40	40	40	40
				40	40	40	40	40	40	40	40
				40	40	40	40	40	40	40	40
				40	40	40	40	40	40	40	40
				40	40	40	40	40	40	40	40
				40	40	40	40	40	40	40	40
				40	40	40	40	40	40	40	40
				40	40	40	40	40	40	40	40
				40	40	40	40	40	40	40	40
				40	40	40	40	40	40	40	40
				40	40	40	40	40	40	40	40
				40	40	40	40	40	40	40	40
				40	40	40	40	40	40	40	40
				40	40	40	40	40	40	40	40
				40	40	40	40	40	40	40	40
				40	40	40	40	40	40	40	40
				40	40	40	40	40	40	40	40
				40	40	40	40	40	40	40	40
				40	40	40	40	40	40	40	40
				40	40	40	40	40	40	40	40
				40	40	40	40	40	40	40	40
				40	40	40	40	40	40	40	40
				40	40	40	40	40	40	40	40
				40	40	40	40	40	40	40	40
				40	40	40	40	40	40	40	40
				40	40	40	40	40	40	40	40
				40	40	40	40	40	40	40	40
				40	40	40	40	40	40	40	40
				40	40	40	40	40	40	40	40
				40	40	40	40	40	40	40	40
				40	40	40	40	40	40	40	40
				40	40	40	40	40	40	40	40
				40	40	40	40	40	40	40	40
				40	40	40	40	40	40	40	40
				40	40	40	40	40	40	40	40
				40	40	40	40	40	40	40	40
				40	40	40	40	40	40	40	40
				40	40	40	40	40	40	40	40
				40	40	40	40	40	40	40	40
				40	40	40	40	40	40	40	40
				40	40	40	40	40	40	40	40
				40	40	40	40	40	40	40	40
				40	40	40	40	40	40	40	40
				40	40	40	40	40	40	40	40
				40	40	40	40	40	40	40	40
				40	40	40	40	40	40	40	40
				40	40	40	40	40	40	40	40
				40	40	40	40	40	40	40	40
				40	40	40	40	40	40	40	40
				40	40	40	40	40	40	40	40
				40	40	40	40	40	40	40	40
				40	40	40	40	40	40	40	40
				40	40	40	40	40	40	40	40
				40	40	40	40	40	40	40	40
				40	40	40	40	40	40	40	40
				40	40	40	40	40	40	40	40
				40	40	40	40	40	40	40	40
				40	40	40	40	40	40	40	40
				40	40	40	40	40	40	40	40
				40	40	40	40	40	40	40	40
				40	40	40	40	40	40	40	40
				40	40	40	40	40	40	40	40
				40	40	40	40	40	40	40	40
				40	40	40	40	40	40	40	40
				40	40	40	40	40	40	40	40
				40	40	40	40	40	40	40	40
				40	40	40	40	40	40	40	40
				40	40	40	40	40	40	40	40
				40	40	40	40	40	40	40	40
				40	40	40	40	40	40	40	40
				40	40	40	40	40	40	40	40
				40	40	40	40	40	40	40	40
				40	40	40	40	40	40	40	40
				40	40	40	40	40	40	40	40
				40	40	40	40	40	40	40	40
				40	40	40	40	40	40	40	40
				40	40	40	40	40	40	40	40
				40	40	40	40	40	40	40	40
				40	40	40	40	40	40	40	40
				40	40	40	40	40	40	40	40
				40	40	40	40	40	40	40	40
				40	40	40	40	40	40	40	40
				40	40	40	40	40	40	40	40
				40	40	40	40	40	40	40	40
				40	40	40	40	40	40	40	40
				40	40	40	40	40	40	40	40
				40	40	40	40	40	40	40	40
				40	40	40	40	40	40	40	40
				40	40	40	40	40	40	40	40
				40	40	40	40	40	40	40	40
				40	40	40	40	40	40	40	40
				40	40	40	40	40	40	40	40
				40	40	40	40	40	40	40	40
				40	40	40	40	40	40	40	40
				40	40	40	40	40	40	40	40
				40	40	40	40	40	40	40	40
				40	40	40	40	40	40	40	40
				40	40	40	40	40	40	40	40
				40	40	40	40	40	40	40	40
				40	40	40	40	40	40	40	40
				40	40	40	40	40	40	40	40
				40	40	40	40	40	40	40	40
				40	40	40	40	40	40	40	40
				40	40	40	40	40	40	40	40
				40	40	40	40	40	40	40	40
				40	40	40	40	40	40	40	40
				40	40	40	40	40	40	40	40
				40	40	40	40	40	40	40	40
				40	40	40	40	40	40	40	40
				40	40	40	40	40	40	40	40
				40	40	40	40	40	40	40	40
				40	40	40	40	40	40	40	40
				40	40	40	40	40	40	40	40
				40	40	40	40	40	40	40	40
				40	40	40	40	40	40	40	40
				40	40	40	40	40	40	40	40
				40	40	40	40	40	40	40	40
				40	40	40	40	40	40	40	40
				40	40	40	40	40	40	40	40
				40	40	40	40	40	40	40	40
				40	40	40	40	40	40	40	40
				40	40	40	40	40	40	40	40
				40	40	40	40	40	40	40	40
				40	40	40	40	40	40	40	40
				40	40	40	40	40	40	40	40
				40	40	40	40	40	40	40	40
				40	40	40	40	40	40	40	40
				40	40	40	40	40	40	40	40
				40	40	40	40	40	40	40	40
				40	40	40	40	40	40	40	40
				40	40	40	40	40	40	40	40
				40	40	40	40	40	40	40	40
				40	40	40	40	40	40	40	40
				40	40	40	40	40	40	40	40
				40	40	40	40	40	40	40	40
				40	40	40	40	40	40	40	40
				40	40	40	40	40	40	40	40
				40	40	40	40	40	40	40	40
				40	40	40	40	40	40	40	40
				40	40	40	40	40	40	40	40
				40	40	40	40	40	40	40	40
				40	40	40	40	40	40	40	40
				40	40	40	40	40	40	40	40
				40	40	40	40	40	40	40	40
				40	40	40	40	40	40	40	40
				40	40	40	40	40	40	40	40
				40	40	40	40	40	40	40	40
				40	40	40	40	40	40	40	40
				40	40	40	40	40	40	40	40
				40	40	40	40	40	40	40	40
				40	40	40	40	40	40	40	40
				40	40	40	40	40	40	40	40
				40	40	40	40	40	40	40	40
				40	40	40	40	40	40	40	40
				40	40	40	40	40	40	40	40
				40	40	40	40	40	40	40	40
				40	40	40	40	40	40	40	40
				40	40	40	40	40	40	40	40
				40	40	40	40	40	40	40	40
				40	40	40	40	40	40	40	40
				40	40	40	40	40	40	40	40
				40	40	40	40	40	40	40	40
				40	40	40	40	40	40	40	40
				40	40	40	40	40	40	40	40
				40	40	40	40	40	40	40	40
				40	40	40	40	40	40	40	40
				40	40	40	40	40	40	40	40
				40	40	40	40	40	40	40	40
				40	40	40	40	40	40	40	40
				40	40	40	40	40	40	40	40
				40	40	40	40	40	40	40	40
				40	40	40	40	40	40	40	40
				40	40	40	40	40	40	40	40
				40	40	40	40	40	40	40	40
				40	40	40	40	40	40	40	40
				40	40	40	40	40	40	40	40
				40	40	40	40	40	40	40	40
				40	40	40	40	40	40	40	40
				40	40	40	40	40	40	40	40
				40	40	40	40	40	40	40	40
				40	40	40	40	40	40	40	40
				40	40	40	40	40	40	40	40
				40	40	40	40	40	40	40	40
				40	40	40	40	40	40	40	40
				40	40	40	40	40	40	40	40
				40	40	40	40	40	40	40	40
				40	40	40	40	40	40	40	40
				40	40	40	40	40	40	40	40
				40	40	40	40	40	40	40	40
				40	40	40	40	40	40	40	40
				40	40	40	40	40	40	40	40
				40	40	40	40	40	40	40	40
				40	40	40	40	40	40	40	40
				40	40	40	40	40	40	40	40
				40	40	40	40	40	40	40	40
				40	40	40	40	40	40	40	40
				40	40	40	40	40	40	40	40

## Sheet: P3
reactions for which a Ct value is not obtained are set at "40"
June	July	August	September	October	November	December	January	February	March	April	May
40	34.75	40	31.62	40	40	30.47	33.05	35.77	33.2	40	40
40	30.78	40	34.33	40	40	34.4	40	40	36.38	40	40
40	31.81	40	35.79	40	40	33.2	40	40	40	40	40
40	28.66	40	33.19	40	40	30.18	40	40	40	40	40
40	29.43	40	34.31	40	40	30.97	40	40	40	40	40
40	40	40	31.44	40	40	40	40	40	40	40	40
40	40	40	32.28	40	40	40	40	40	40	40	40
40	40	40	40	40	40	40	40	40	40	40	40
40	40	40	40	40	40	40	40	40	40	40	40
40	40	40	40	40	40	40	40	40	40	40	40
40		36.54		40	40			40		40	40
40		38.18		40	40			40		40	40
40		36.5		40	40			40		40	40
40		36		40	40			40		40	40
40		40		40	40			40		40	40
40		40		40	40			40		40	40
40		40		40	40			40		40	40
40		40		40	40			40		40	40
40		40		40	40			40		40	40
40		40		40	40			40		40	40
40		40		34.81	40					30.38	40
40		40		31.22	40					32.34	40
40		40		31.17	40					34.33	40
40		40		30.78	40					31.43	40
40		40		32.43	40					33.12	40
40		40		34.3	40					32.62	40
40		40		38.49	40					31.65	40
40		40		40	40					40	40
40		40		40	40					40	40
40		40		40	40					40	40
40		40		40	40					40	40
40		40		40	40					40	40
40		40		40	40					40	40
40		40		40	40					40	40
40		40		40	40					40	40
40		40		40	40					40	40
40		40		40	40					40	40
40		40		40	40					40	40
40		40		40	40					40	40
40		40		40	40					40	40
40		40		40	40					40	40
40		40		40	40					40	40
40		40		40	40					40	40
40		40		40	40					40	40
40		40		40	40					40	40
40		40		40	40					40	40
40		40		40	40					40	40
40		40		40	40					40	40
40		40		40	40					40	40
40		40		40	40					40	40
40		40		40	40					40	40
40		40		40	40					40	40
40		40		40	40					40	40
40		40		40	40					40	40
40		40		40	40					40	40
40		40		40	40					40	40
40		40		40	40					40	40
40		40		40	40					40	40
40		40		40	40					40	40
40		40		40	40					40	40
40		40		40	40					40	40
40		40		40	40					40	40
40		40		40	40					40	40
40		40		40	40					40	40
40		40		40	40					40	40
40		40		40	40					40	40
40		40		40	40					40	40
40		40		40	40					40	40
40		40		40	40					40	40
40		40		40	40					40	40
40		40		40	40					40	40
40		40		40	40					40	40
40		40		40	40					40	40
40		40		40	40					40	40
40		40		40	40					40	40
40		40		40	40					40	40
40		40		40	40					40	40
40		40		40	40					40	40
40		40		40	40					40	40
40		40		40	40					40	40
40		40		40	40					40	40
40		40		40	40					40	40
40		40		40	40					40	40
40		40		40	40					40	40
40		40		40	40					40	40
40		40		40	40					40	40
40		40		40	40					40	40
40		40		40	40					40	40
40		40		40	40					40	40
40		40		40	40					40	40
40		40		40	40					40	40
40		40		40	40					40	40
40		40		40	40					40	40
40		40		40	40					40	40
40		40		40	40					40	40
40		40		40	40					40	40
40		40		40	40					40	40
40		40		40	40					40	40
40		40		40	40					40	40
40		40		40	40					40	40
40		40		40	40					40	40
40		40		40	40					40	40
40		40		40	40					40	40
40		40		40	40					40	40
40		40		40	40					40	40
40		40		40	40					40	40
40		40		40	40					40	40
40		40		40	40					40	40
40		40		40	40					40	40
40		40		40	40					40	40
40		40		40	40					40	40
40		40		40	40					40	40
40					40					40	40
40					40					40	40
40					40					40	40
40					40					40	40
40					40					40	40
40					40					40	40
40					40					40	40
40					40					40	40
40					40					40	40
40					40					40	40
40					40					40	40
40					40					40	40
40					40					40	40
40					40					40	40
40					40					40	40
40					40					40	40
40					40					40	40
40					40					40	40
40					40					40	40
40					40					40	40
40					40					40	40
40					40					40	40
40					40					40	40
40					40					40	40
40					40					40	40
40					40					40	40
40					40					40	40
40					40					40	40
40					40					40	40
40					40					40	40
40					40					40	40
40					40					40	40
40					40					40	40
40					40					40	40
40					40					40	40
40					40					40	40
40					40					40	40
40					40					40	40
40					40					40	40
40					40					40	40
40					40					40	40
40					40					40	40
40					40					40	40
40					40					40	40
40					40					40	40
40					40					40	40
40					40					40	40
40					40					40	40
40					40					40	40
40					40					40	40
40					40					40	40
40					40					40	40
40					40					40	40
40					40					40	40
40					40					40	40
40					40					40	40
40					40					40	40
40					40					40	40
40					40					40	40
40					40					40	40
40					40					40	40
40					40					40	40
40					40					40	40
40					40					40	40
40					40					40	40
40					40					40	40
40					40					40	40
40					40					40	40
40					40					40	40
40					40					40	40
40					40					40	40
40					40					40	40
40					40					40	40
40					40					40	40
40					40					40	40
40					40					40	40
40					40					40	40
40					40					40	40
40					40					40	40
40					40					40	40
40					40					40	40
40					40					40	40
40					40					40	40
40					40					40	40
40					40					40	40
40					40					40	40
40					40					40	40
40					40					40	40
40					40					40	40
40					40					40	40
40					40					40	40
40					40					40	40
40					40					40	40
40					40					40	40
40					40					40	40
40					40					40	40
40					40					40	40
40					40					40	40
40					40					40	40
40					40					40	40
40					40					40	40
40					40					40	40
40					40					40	40
40					40					40	40
40					40					40	40
40					40					40	40
40					40					40	40
40					40					40	40
40					40					40	40
40					40					40	40
40					40					40	40
40					40					40	40
40					40					40	40
40					40					40	40
40					40					40	40
40					40					40	40
40					40					40	40
40					40					40	40
40					40					40	40
40					40					40	40
40					40					40	40
40					40					40	40
40					40					40	40
40					40					40	40
40					40					40	40
40					40					40	40
40					40					40	40
40					40					40	40
40					40					40	40
40					40					40	40
40					40					40	40
40					40					40	40
40					40					40	40
40					40					40	40
40					40					40	40
40					40					40	40
40					40					40	40
40					40					40	40
40					40					40	40
40					40					40	40
40					40					40	40
40					40					40	40
40					40					40	40
40					40					40	40
40					40					40	40
40					40					40	40
40					40					40	40
40					40					40	40
40					40					40	40
40					40					40	40
40					40					40	40
40					40					40	40
40					40					40	40
40					40					40	40
40					40					40	40
40					40					40	40
40					40					40	40
40					40					40	40
40					40					40	40
40					40					40	40
40					40					40	40
40					40					40	40
40					40					40	40
40					40					40	40
40					40					40	40
40					40					40	40
40					40					40	40
40					40					40	40
40					40					40	40
40					40					40	40
40					40					40	40
40					40					40	40
40					40					40	40
40					40					40	40
40					40					40	40
40					40					40	40
40					40					40	40
40					40					40	40
40					40					40	40
40					40					40	40
40					40					40	40
40					40					40	40
40					40					40	40
40					40					40	40
40					40					40	40
40					40					40	40
40					40					40	40
40					40					40	40
40					40					40	40
40					40					40	40
40					40					40	40
40					40					40	40
40					40					40	40
40					40					40	40
40					40					40	40
40					40					40	40
40					40					40	40
40					40					40	40
40					40					40	40
40					40					40	40
40					40					40	40
40					40					40	40
40					40					40	40
40					40					40	40
40					40					40	40
40					40					40	40
40					40					40	40
40					40					40	40
40					40					40	40
40					40					40	40
40					40					40	40
40					40					40	40
40					40					40	40
40					40					40	40
40					40					40	40
40					40					40	40
40					40					40	40
40					40					40	40
40					40					40	40
40					40					40	40
40					40					40	40
40					40					40	40
40					40					40	40
40					40					40	40
40					40					40	40
40					40					40	40
40					40					40	40
40					40					40	40
40					40					40	40
40					40					40	40
40					40					40	40
40					40					40	40
40					40					40	40
40					40					40	40
40					40					40	40
40					40					40	40
40					40					40	40
40					40					40	40
40					40					40	40
40					40					40	40
40					40					40	40
40					40					40	40
40					40					40	40
40					40					40	40
40					40					40	40
40					40					40	40
40					40					40	40
40					40					40	40
40					40					40	40
40					40					40	40
40					40					40	40
40					40					40	40
40					40					40	40
40					40					40	40
40					40					40	40
40					40					40	40
40					40					40	40
40					40					40	40
40					40					40	40
40					40					40	40
40					40					40	40
40					40					40	40
40					40					40	40
40					40					40	40
40					40					40	40
40					40					40	40
40					40					40	40
40					40					40	40
40					40					40	40
40					40					40	40
40					40					40	40
40					40					40	40
40					40					40	40
40					40					40	40
40					40					40	40
40					40					40	40

## Sheet: P10
reactions for which a Ct value is not obtained are set at "40"
June	July	August	September	October	November	December	January	February	March	April	May
29.89	27.17	27.73	32.93	40	35.5	35.06	40	31.09	29.32	32.57	30.91
31.46	40	40	30.53	40	40	40	40	40	35.93	33.21	32.06
35.35	40	40	31.33	40	40	40	40	40	40	31.48	40
40	40	40	34.77	40	40	40	40	40	40	40	40
40	40	40	40	40	40	40	40	40	40	40	40
40	40	40	40	40	40	40	40	40	40	40	33.39
40	40	40	40	40	40	40	40	40	40	40	29.61
40	40	40	40	40	40	40	40	40	40	40	40
40	40	40	40	40	40	40	40	40	40	40	40
40	40	40	40	40	40	40	40	40	40	40	40
40		33.45		40			40
40		35.02		40			40
40		33.41		40			40
40		35.73		40			40
40		30.37		40			40
40		40		40			40
40		40		40			40
40		40		40			40
40		40		40			40
40		40		40			40
		40		32.41			40
		40		35.34			40
		40		32.17			40
		40		36.3			40
		40		30.29			40
		40		32.25			40
		40		36.3			40
		40		36.03			40
		40		40			40
		40		40			40
		40		40			40
		40		40			40
		40		40			40
		40		40			40
		40		40			40
		40		40			40
		40		40			40
		40		40			40
		40		40			40
		40		40			40
		40		40			40
		40		40			40
		40		40			40
		40		40			40
		40		40			40
		40		40			40
		40		40			40
		40		40			40
		40		40			40
		40		40			40
		40		40			40
		40		40			40
		40		40			40
		40		40			40
		40		40			40
		40		40			40
		40		40			40
		40		40			40
		40		40			40
		40		40			40
		40		40			40
		40		40			40
		40		40			40
		40		40			40
		40		40			40
		40		40			40
		40		40			40
		40		40			40
		40		40			40
		40		40			40
		40		40			40
		40		40			40
		40		40			40
		40		40			40
		40		40			40
		40		40			40
		40		40			40
		40		40			40
		40		40			40
		40		40			40
		40		40			40
		40		40			40
		40		40			40
		40		40			40
		40		40			40
		40		40			40
		40		40			40
		40		40			40
		40		40			40
		40		40			40
		40		40			40
		40		40			40
		40		40			40
		40		40			40
		40		40			40
		40		40			40
		40		40			40
		40		40			40
		40		40			40
		40		40			40
		40		40			40
		40		40			40
		40		40			40
		40		40			40
		40		40			40
		40		40			40
		40		40			40
		40		40			40
		40		40			40
		40		40			40
		40		40			40
		40		40			40
							40
							40
							40
							40
							40
							40
							40
							40
							40
							40
							40
							40
							40
							40
							40
							40
							40
							40
							40
							40
							40
							40
							40
							40
							40
							40
							40
							40
							40
							40
							40
							40
							40
							40
							40
							40
							40
							40
							40
							40
							40
							40
							40
							40
							40
							40
							40
							40
							40
							40
							40
							40
							40
							40
							40
							40
							40
							40
							40
							40
							40
							40
							40
							40
							40
							40
							40
							40
							40
							40
							40
							40
							40
							40
							40
							40
							40
							40
							40
							40
							40
							40
							40
							40
							40
							40
							40
							40
							40
							40
							40
							40
							40
							40
							40
							40
							40
							40
							40
							40
							40
							40
							40
							40
							40
							40
							40
							40
							40
							40
							40
							40
							40
							40
							40
							40
							40
							40
							40
							40
							40
							40
							40
							40
							40
							40
							40
							40
							40
							40
							40
							40
							40
							40
							40
							40
							40
							40
							40
							40
							40
							40
							40
							40
							40
							40
							40
							40
							40
							40
							40
							40
							40
							40
							40
							40
							40
							40
							40
							40
							40
							40
							40
							40
							40
							40
							40
							40
							40
							40
							40
							40
							40
							40
							40
							40
							40
							40
							40
							40
							40
							40
							40
							40
							40
							40
							40
							40
							40
							40
							40
							40
							40
							40
							40
							40
							40
							40
							40
							40
							40
							40
							40
							40
							40
							40
							40
							40
							40
							40
							40
							40
							40
							40
							40
							40
							40
							40
							40
							40
							40
							40
							40
							40
							40
							40
							40
							40
							40
							40
							40
							40
							40
							40
							40
							40
							40
							40
							40
							40
							40
							40
							40
							40
							40
							40
							40
							40
							40
							40
							40
							40
							40
							40
							40
							40
							40
							40
							40
							40
							40
							40
							40
							40
							40
							40
							40
							40
							40
							40
							40
							40
							40
							40
							40
							40

## Sheet: P11
reactions for which a Ct value is not obtained are set at "40"
June	July	August	September	October	November	December	January	February	March	April	May
35.84	31.02	36.33	35.68	40	29.94	40	40	31.24	40	40	40
36.74	36.53	36.54	36.46	40	40	40	40	40	40	40	40
40	40	40	40	40	40	40	40	40	40	40	40
40	40	40	40	40	40	40	40	40	40	40	40
40	40	40	40	40	40	40	40	40	40	40	40
40	40	40	40	40	40	40	40	40	40	40	40
40	40	40	40	40	40	40	40	40	40	40	40
40	40	40	40	40	40	40	40	40	40	40	40
40	40	40	40	40	40	40	40	40	40	40	40
40	40	40	40	40	40	40	40	40	40	40	40
40		40	40	40		40	40		40	40	40
40		40	40	40		40	40		40	40	40
40		40	40	40		40	40		40	40	40
40		40	40	40		40	40		40	40	40
40		40	40	40		40	40		40	40	40
40		40	40	40		40	40		40	40	40
40		40	40	40		40	40		40	40	40
40		40	40	40		40	40		40	40	40
40		40	40	40		40	40		40	40	40
40		40	40	40		40	40		40	40	40
40		40	40	40		37.33	36.66		40	40	36.34
40		40	40	40		30.44	35.14		40	40	37.46
40		40	40	40		36.18	36.27		40	40	36.38
40		40	40	40		33.31	31.61		40	40	37.13
40		40	40	40		37.32	40		40	40	37.74
40		40	40	40		30.58	40		40	40	40
40		40	40	40		31.88	40		40	40	40
40		40	40	40		36.41	40		40	40	40
40		40	40	40		35.22	40		40	40	40
40		40	40	40		32.39	40		40	40	40
40		40	40	40		39.05	40		40	40	40
40		40	40	40		31.37	40		40	40	40
40		40	40	40		37.61	40		40	40	40
40		40	40	40		36	40		40	40	40
40		40	40	40		40	40		40	40	40
40		40	40	40		40	40		40	40	40
40		40	40	40		40	40		40	40	40
40		40	40	40		40	40		40	40	40
40		40	40	40		40	40		40	40	40
40		40	40	40		40	40		40	40	40
40		40	40	40		40	40		40	40	40
40		40	40	40		40	40		40	40	40
40		40	40	40		40	40		40	40	40
40		40	40	40		40	40		40	40	40
40		40	40	40		40	40		40	40	40
40		40	40	40		40	40		40	40	40
40		40	40	40		40	40		40	40	40
40		40	40	40		40	40		40	40	40
40		40	40	40		40	40		40	40	40
40		40	40	40		40	40		40	40	40
40		40	40	40		40	40		40	40	40
40		40	40	40		40	40		40	40	40
40		40	40	40		40	40		40	40	40
40		40	40	40		40	40		40	40	40
40		40	40	40		40	40		40	40	40
40		40	40	40		40	40		40	40	40
40		40	40	40		40	40		40	40	40
40		40	40	40		40	40		40	40	40
40		40	40	40		40	40		40	40	40
40		40	40	40		40	40		40	40	40
40		40	40	40		40	40		40	40	40
40		40	40	40		40	40		40	40	40
40		40	40	40		40	40		40	40	40
40		40	40	40		40	40		40	40	40
40		40	40	40		40	40		40	40	40
40		40	40	40		40	40		40	40	40
40		40	40	40		40	40		40	40	40
40		40	40	40		40	40		40	40	40
40		40	40	40		40	40		40	40	40
40		40	40	40		40	40		40	40	40
40		40	40	40		40	40		40	40	40
40		40	40	40		40	40		40	40	40
40		40	40	40		40	40		40	40	40
40		40	40	40		40	40		40	40	40
40		40	40	40		40	40		40	40	40
40		40	40	40		40	40		40	40	40
40		40	40	40		40	40		40	40	40
40		40	40	40		40	40		40	40	40
40		40	40	40		40	40		40	40	40
40		40	40	40		40	40		40	40	40
40		40	40	40		40	40		40	40	40
40		40	40	40		40	40		40	40	40
40		40	40	40		40	40		40	40	40
40		40	40	40		40	40		40	40	40
40		40	40	40		40	40		40	40	40
40		40	40	40		40	40		40	40	40
40		40	40	40		40	40		40	40	40
40		40	40	40		40	40		40	40	40
40		40	40	40		40	40		40	40	40
40		40	40	40		40	40		40	40	40
40		40	40	40		40	40		40	40	40
40		40	40	40		40	40		40	40	40
40		40	40	40		40	40		40	40	40
40		40	40	40		40	40		40	40	40
40		40	40	40		40	40		40	40	40
40		40	40	40		40	40		40	40	40
40		40	40	40		40	40		40	40	40
40		40	40	40		40	40		40	40	40
40		40	40	40		40	40		40	40	40
40		40	40	40		40	40		40	40	40
40		40	40	40		40	40		40	40	40
40		40	40	40		40	40		40	40	40
40		40	40	40		40	40		40	40	40
40		40	40	40		40	40		40	40	40
40		40	40	40		40	40		40	40	40
40		40	40	40		40	40		40	40	40
40		40	40	40		40	40		40	40	40
40		40	40	40		40	40		40	40	40
40		40	40	40		40	40		40	40	40
40		40	40	40		40	40		40	40	40
40		40	40	40		40	40		40	40	40
40		40	40	40		40	40		40	40	40
		40		40		40	35.26		40	40	40
		40		40		40	34.95		40	40	40
		40		40		40	40		40	40	40
		40		40		40	40		40	40	40
		40		40		40	40		40	40	40
		40		40		40	40		40	40	40
		40		40		40	40		40	40	40
		40		40		40	40		40	40	40
		40		40		40	40		40	40	40
		40		40		40	40		40	40	40
		40		40		40	40		40	40	40
		40		40		40	40		40	40	40
		40		40		40	40		40	40	40
		40		40		40	40		40	40	40
		40		40		40	40		40	40	40
		40		40		40	40		40	40	40
		40		40		40	40		40	40	40
		40		40		40	40		40	40	40
		40		40		40	40		40	40	40
		40		40		40	40		40	40	40
		40		40		40	40		40	40	40
		40		40		40	40		40	40	40
		40		40		40	40		40	40	40
		40		40		40	40		40	40	40
		40		40		40	40		40	40	40
		40		40		40	40		40	40	40
		40		40		40	40		40	40	40
		40		40		40	40		40	40	40
		40		40		40	40		40	40	40
		40		40		40	40		40	40	40
		40		40		40	40		40	40	40
		40		40		40	40		40	40	40
		40		40		40	40		40	40	40
		40		40		40	40		40	40	40
		40		40		40	40		40	40	40
		40		40		40	40		40	40	40
		40		40		40	40		40	40	40
		40		40		40	40		40	40	40
		40		40		40	40		40	40	40
		40		40		40	40		40	40	40
		40		40		40	40		40	40	40
		40		40		40	40		40	40	40
		40		40		40	40		40	40	40
		40		40		40	40		40	40	40
		40		40		40	40		40	40	40
		40		40		40	40		40	40	40
		40		40		40	40		40	40	40
		40		40		40	40		40	40	40
		40		40		40	40		40	40	40
		40		40		40	40		40	40	40
		40		40		40	40		40	40	40
		40		40		40	40		40	40	40
		40		40		40	40		40	40	40
		40		40		40	40		40	40	40
		40		40		40	40		40	40	40
		40		40		40	40		40	40	40
		40		40		40	40		40	40	40
		40		40		40	40		40	40	40
		40		40		40	40		40	40	40
		40		40		40	40		40	40	40
		40		40		40	40		40	40	40
		40		40		40	40		40	40	40
		40		40		40	40		40	40	40
		40		40		40	40		40	40	40
		40		40		40	40		40	40	40
		40		40		40	40		40	40	40
		40		40		40	40		40	40	40
		40		40		40	40		40	40	40
		40		40		40	40		40	40	40
		40		40		40	40		40	40	40
		40		40		40	40		40	40	40
		40		40		40	40		40	40	40
		40		40		40	40		40	40	40
		40		40		40	40		40	40	40
		40		40		40	40		40	40	40
		40		40		40	40		40	40	40
		40		40		40	40		40	40	40
		40		40		40	40		40	40	40
		40		40		40	40		40	40	40
		40		40		40	40		40	40	40
		40		40		40	40		40	40	40
		40		40		40	40		40	40	40
		40		40		40	40		40	40	40
		40		40		40	40		40	40	40
		40		40		40	40		40	40	40
		40		40		40	40		40	40	40
		40		40		40	40		40	40	40
		40		40		40	40		40	40	40
		40		40		40	40		40	40	40
		40		40		40	40		40	40	40
		40		40		40	40		40	40	40
		40		40		40	40		40	40	40
		40		35.56		40	35.21		40	40	40
		40		39.64		40	36.25		40	40	40
		40		40		40	37.4		40	40	40
		40		40		40	36.05		40	40	40
		40		40		40	31.67		40	40	40
		40		40		40	32.44		40	40	40
		40		40		40	35.42		40	40	40
		40		40		40	32.14		40	40	40
		40		40		40	40		40	40	40
		40		40		40	40		40	40	40
		40		40		40	40		40	40	40
		40		40		40	40		40	40	40
		40		40		40	40		40	40	40
		40		40		40	40		40	40	40
		40		40		40	40		40	40	40
		40		40		40	40		40	40	40
		40		40		40	40		40	40	40
		40		40		40	40		40	40	40
		40		40		40	40		40	40	40
		40		40		40	40		40	40	40
		40		40		40	40		40	40	40
		40		40		40	40		40	40	40
		40		40		40	40		40	40	40
		40		40		40	40		40	40	40
		40		40		40	40		40	40	40
		40		40		40	40		40	40	40
		40		40		40	40		40	40	40
		40		40		40	40		40	40	40
		40		40		40	40		40	40	40
		40		40		40	40		40	40	40
		40		40		40	40		40	40	40
		40		40		40	40		40	40	40
		40		40		40	40		40	40	40
		40		40		40	40		40	40	40
		40		40		40	40		40	40	40
		40		40		40	40		40	40	40
		40		40		40	40		40	40	40
		40		40		40	40		40	40	40
		40		40		40	40		40	40	40
		40		40		40	40		40	40	40
		40		40		40	40		40	40	40
		40		40		40	40		40	40	40
		40		40		40	40		40	40	40
		40		40		40	40		40	40	40
		40		40		40	40		40	40	40
		40		40		40	40		40	40	40
		40		40		40	40		40	40	40
		40		40		40	40		40	40	40
		40		40		40	40		40	40	40
		40		40		40	40		40	40	40
		40		40		40	40		40	40	40
		40		40		40	40		40	40	40
		40		40		40	40		40	40	40
		40		40		40	40		40	40	40
		40		40		40	40		40	40	40
		40		40		40	40		40	40	40
		40		40		40	40		40	40	40
		40		40		40	40		40	40	40
		40		40		40	40		40	40	40
		40		40		40	40		40	40	40
		40		40		40	40		40	40	40
		40		40		40	40		40	40	40
		40		40		40	40		40	40	40
		40		40		40	40		40	40	40
		40		40		40	40		40	40	40
		40		40		40	40		40	40	40
		40		40		40	40		40	40	40
		40		40		40	40		40	40	40
		40		40		40	40		40	40	40
		40		40		40	40		40	40	40
		40		40		40	40		40	40	40
		40		40		40	40		40	40	40
		40		40		40	40		40	40	40
		40		40		40	40		40	40	40
		40		40		40	40		40	40	40
		40		40		40	40		40	40	40
		40		40		40	40		40	40	40
		40		40		40	40		40	40	40
		40		40		40	40		40	40	40
		40		40		40	40		40	40	40
		40		40		40	40		40	40	40
		40		40		40	40		40	40	40
		40		40		40	40		40	40	40
		40		40		40	40		40	40	40
		40		40		40	40		40	40	40
		40		40		40	40		40	40	40
		40		40		40	40		40	40	40
		40		40		40	40		40	40	40
		40		40		40	40		40	40	40
		40		40		40	40		40	40	40
		40		40		40	40		40	40	40
		40		40		40	40		40	40	40
		40		36.39		40	32.27		40	40	40
		40		36.13		40	34.51		40	40	40
		40		35.37		40	40		40	40	40
		40		33.64		40	40		40	40	40
		40		40		40	40		40	40	40
		40		40		40	40		40	40	40
		40		40		40	40		40	40	40
		40		40		40	40		40	40	40
		40		40		40	40		40	40	40
		40		40		40	40		40	40	40
		40		40		40	40		40	40	40
		40		40		40	40		40	40	40
		40		40		40	40		40	40	40
		40		40		40	40		40	40	40
		40		40		40	40		40	40	40
		40		40		40	40		40	40	40
		40		40		40	40		40	40	40
		40		40		40	40		40	40	40
		40		40		40	40		40	40	40
		40		40		40	40		40	40	40
		40		40		40	40		40	40	40
		40		40		40	40		40	40	40
		40		40		40	40		40	40	40
		40		40		40	40		40	40	40
		40		40		40	40		40	40	40
		40		40		40	40		40	40	40
		40		40		40	40		40	40	40
		40		40		40	40		40	40	40
		40		40		40	40		40	40	40
		40		40		40	40		40	40	40
		40		40		40	40		40	40	40
		40		40		40	40		40	40	40
		40		40		40	40		40	40	40
		40		40		40	40		40	40	40
		40		40		40	40		40	40	40
		40		40		40	40		40	40	40
		40		40		40	40		40	40	40
		40		40		40	40		40	40	40
		40		40		40	40		40	40	40
		40		40		40	40		40	40	40
		40		40		40	40		40	40	40
		40		40		40	40		40	40	40
		40		40		40	40		40	40	40
		40		40		40	40		40	40	40
		40		40		40	40		40	40	40
		40		40		40	40		40	40	40
		40		40		40	40		40	40	40
		40		40		40	40		40	40	40
		40		40		40	40		40	40	40
		40		40		40	40		40	40	40
		40		40		40	40		40	40	40
		40		40		40	40		40	40	40
		40		40		40	40		40	40	40
		40		40		40	40		40	40	40
		40		40		40	40		40	40	40
		40		40		40	40		40	40	40
		40		40		40	40		40	40	40
		40		40		40	40		40	40	40
		40		40		40	40		40	40	40
		40		40		40	40		40	40	40
		40		40		40	40		40	40	40
		40		40		40	40		40	40	40
		40		40		40	40		40	40	40
		40		40		40	40		40	40	40
		40		40		40	40		40	40	40
		40		40		40	40		40	40	40
		40		40		40	40		40	40	40
		40		40		40	40		40	40	40
		40		40		40	40		40	40	40
		40		40		40	40		40	40	40
		40		40		40	40		40	40	40
		40		40		40	40		40	40	40
		40		40		40	40		40	40	40
		40		40		40	40		40	40	40
		40		40		40	40		40	40	40
		40		40		40	40		40	40	40
		40		40		40	40		40	40	40
		40		40		40	40		40	40	40
		40		40		40	40		40	40	40
		40		40		40	40		40	40	40
		40		40		40	40		40	40	40
		40		40		40	40		40	40	40
		40		40		40	40		40	40	40
		40		40		40	40		40	40	40
		40		40		40	40		40	40	40
		40		40		40	40		40	40	40
		40		40		40	40		40	40	40
		40		40		40	40		40	40	40
		40		40		40	40
		40		40		40	40
		40		40		40	40
		40		40		40	40

## Sheet: P21
reactions for which a Ct value is not obtained are set at "40"
June	July	August	September	October	November
30.29	33	40	33.63	28.13	35.38
31.78	33.66	40	40	34.16	40
32.52	32.39	29.54	40	40	40
33.44	33.2	31.26	40	40	40
40	34.8	40	40	40	40
40	40	40	40	40	40
40	40	33.35	40	40	40
40	40	32.67	40	40	40
40	40	40	40	40	40
40	40	40	40	40	40
			40
			40
			40
			40
			40
			40
			40
			40
			40
			40

[truncated: 18 more sheets: P13, P19, P18, P20, P5, P15, P16, P17, P1, P8, P14, N1, N2, T1, T2, T3, T4, T5]
