# Supplementary material for: Serial ‘deep-sampling’ PCR of fragmented DNA reveals the wide range of Trypanosoma cruzi burden among chronically infected human, macaque, and canine hosts, and allows accurate monitoring of parasite load following treatment
Source: eLife. 2025 Apr 15;14:RP104547. doi: 10.7554/eLife.104547 (PMC11999692; doi:10.7554/eLife.104547)
Supplement: Figure 3—source data 1. [file elife-104547-fig3-data1.xlsx]

## Sheet: P7
reactions for which a Ct value is not obtained are set at "40"
June	July	August	September	October	November	December	January	March	April	May
37.43	40	40	40	40	40	40	40	40	40	32.86
36.6	40	40	40	40	40	40	40	40	40	40
36.9	40	40	40	40	40	40	40	40	40	40
37.95	40	40	40	40	40	40	40	40	40	40
37.7	40	40	40	40	40	40	40	40	40	40
40	40	40	40	40	40	40	40	40	40	40
40	40	40	40	40	40	40	40	40	40	40
40	40	40	40	40	40	40	40	40	40	40
40	40	40	40	40	40	40	40	40	40	40
40	36.58	40	40	40	40	40	40	40	31.8	40
40	40	40	34.41	40	40	40	40	40	40
40	40	40	40	40	40	40	40	40	40
40	40	40	40	40	40	40	40	40	40
40	40	40	40	40	40	40	40	40	40
40	40	40	40	40	40	40	40	40	40
40	40	40	40	40	40	40	40	40	40
40	40	40	40	40	40	40	40	40	40
40	40	40	40	40	40	40	40	40	40
40	40	40	40	40	40	40	40	40	40
40	40	40	40	40	40	40	40	40	40
40	40	40	40	40	40	40	40	40
40	40	40	40	40	40	40	40	40
40	40	40	40	40	40	40	40	40
40	40	40	40	40	40	40	40	40
40	40	40	40	40	40	40	40	40
40	40	40	40	40	40	40	40	40
40	40	40	40	40	40	40	40	40
40	40	40	40	40	40	40	40	40
40	40	40	40	40	40	40	40	40
40	40	40	40	40	40	40	40	40
40	40	40	40	40	40	40	40	40
40	40	40	40	40	40	40	40	40
40	40	40	40	40	40	40	40	40
40	40	40	40	40	40	40	40	40
40	40	40	40	40	40	40	40	40
40	40	40	40	40	40	40	40	40
40	40	40	40	40	40	40	40	40
40	40	40	40	40	40	40	40	40
40	40	40	40	40	40	40	40	40
40	40	40	40	40	40	40	40	40
40	40	40	40	40	40	40	40	40
40	40	40	40	40	40	40	40	40
40	40	40	40	40	40	40	40	40
40	40	40	40	40	40	40	40	40
40	40	40	40	40	40	40	40	40
40	40	40	40	40	40	40	40	40
40	40	40	40	40	40	40	40	40
40	40	40	40	40	40	40	40	40
40	40	40	40	40	40	40	40	40
40	40	40	40	40	40	40	40	40
40	40	40	40	40	40	40	40	40
40	40	40	40	40	40	40	40	40
40	40	40	40	40	40	40	40	40
40	40	40	40	40	40	40	40	40
40	40	40	40	40	40	40	40	40
40	40	40	40	40	40	40	40	40
40	40	40	40	40	40	40	40	40
40	40	40	40	40	40	40	40	40
40	40	40	40	40	40	40	40	40
40	40	40	40	40	40	40	40	40
40	40	40	40	40	40	40	40	40
40	40	40	40	40	40	40	40	40
40	40	40	40	40	40	40	40	40
40	40	40	40	40	40	40	40	40
40	40	40	40	40	40	40	40	40
40	40	40	40	40	40	40	40	40
40	40	40	40	40	40	40	40	40
40	40	40	40	40	40	40	40	40
40	40	40	40	40	40	40	40	40
40	40	40	40	40	40	40	40	40
40	40	40	40	40	40	40	40	40
40	40	40	40	40	40	40	40	40
40	40	40	40	40	40	40	40	40
40	40	40	40	40	40	40	40	40
40	40	40	40	40	40	40	40	40
40	40	40	40	40	40	40	40	40
40	40	40	40	40	40	40	40	40
40	40	40	40	40	40	40	40	40
40	40	40	40	40	40	40	40	40
40	40	40	40	40	40	40	40	40
40	40	40	40	40	40	40	40	40
40	40	40	40	40	40	40	40	40
40	40	40	40	40	40	40	40	40
40	40	40	40	40	40	40	40	40
40	40	40	40	40	40	40	40	40
40	40	40	40	40	40	40	40	40
40	40	40	40	40	40	40	40	40
40	40	40	40	40	40	40	40	40
40	40	40	40	40	40	40	40	40
40	40	40	40	40	40	40	40	40
40	40	40	40	40	40	40	40	40
40	40	40	40	40	40	40	40	40
40	40	40	40	40	40	40	40	40
40	40	40	40	40	40	40	40	40
40	40	40	40	40	40	40	40	40
40	40	40	40	40	40	40	40	40
40	40	40	40	40	40	40	40	40
40	40	40	40	40	40	40	40	40
40	40	40	40	40	40	40	40	40
40	40	40	40	40	40	40	40	40
40	40	40	40	40	40	40	40	40
40	40	40	40	40	40	40	40	40
40	40	40	40	40	40	40	40	40
40	40	40	40	40	40	40	40	40
40	40	40	40	40	40	40	40	40
40	40	40	40	40	40	40	40	40
40	40	40	40	40	40	40	40	40
40	40	40	40	40	40	40	40	40
40	40	40	40	40	40	40	40	40
40	40	40	40	40	40	40	40	40
40	40	40	40	40	40	40	40	40
40	40	40	40	40	40	40	40	40
40	40	40	40	40	40	40	40	40
40	40	40	40	40	40	40	40	40
40	40	40	40	40	40	40	40	40
40	40	40	40	40	40	40	40	40
40	40	40	40	40	40	40	40	40
40	40	40	40	40	40	40	40	40
40	40	40	40	40	40	40	40	40
40	40	40	40	40	40	40	40	40
40	40	40	40	40	40	40	40	40
40	40	40	40	40	40	40	40	40
40	40	40	40	40	40	40	40	40
40	40	40	40	40	40	40	40	40
40	40	40	40	40	40	40	40	40
40	40	40	40	40	40	40	40	40
40	40	40	40	40	40	40	40	40
40	40	40	40	40	40	40	40	40
40	40	40	40	40	40	40	40	40
40	40	40	40	40	40	40	40	40
40	40	40	40	40	40	40	40	40
40	40	40	40	40	40	40	40	40
40	40	40	40	40	40	40	40	40
40	40	40	40	40	40	40	40	40
40	40	40	40	40	40	40	40	40
40	40	40	40	40	40	40	40	40
40	40	40	40	40	40	40	40	40
40	40	40	40	40	40	40	40	40
40	40	40	40	40	40	40	40	40
40	40	40	40	40	40	40	40	40
40	40	40	40	40	40	40	40	40
40	40	40	40	40	40	40	40	40
40	40	40	40	40	40	40	40	40
40	40	40	40	40	40	40	40	40
40	40	40	40	40	40	40	40	40
40	40	40	40	40	40	40	40	40
40	40	40	40	40	40	40	40	40
40	40	40	40	40	40	40	40	40
40	40	40	40	40	40	40	40	40
40	40	40	40	40	40	40	40	40
40	40	40	40	40	40	40	40	40
40	40	40	40	40	40	40	40	40
40	40	40	40	40	40	40	40	40
40	40	40	40	40	40	40	40	40
40	40	40	40	40	40	40	40	40
40	40	40	40	40	40	40	40	40
40	40	40	40	40	40	40	40	40
40	40	40	40	40	40	40	40	40
40	40	40	40	40	40	40	40	40
40	40	40	40	40	40	40	40	40
40	40	40	40	40	40	40	40	40
40	40	40	40	40	40	40	40	40
40	40	40	40	40	40	40	40	40
40	40	40	40	40	40	40	40	40
40	40	40	40	40	40	40	40	40
40	40	40	40	40	40	40	40	40
40	40	40	40	40	40	40	40	40
40	40	40	40	40	40	40	40	40
40	40	40	40	40	40	40	40	40
40	40	40	40	40	40	40	40	40
40	40	40	40	40	40	40	40	40
40	40	40	40	40	40	40	40	40
40	40	40	40	40	40	40	40	40
40	40	40	40	40	40	40	40	40
40	40	40	40	40	40	40	40	40
40	40	40	40	40	40	40	40	40
40	40	40	40	40	40	40	40	40
40	40	40	40	40	40	40	40	40
40	40	40	40	40	40	40	40	40
40	40	40	40	40	40	40	40	40
40	40	40	40	40	40	40	40	40
40	40	40	40	40	40	40	40	40
40	40	40	40	40	40	40	40	40
40	40	40	40	40	40	40	40	40
40	40	40	40	40	40	40	40	40
40	40	40	40	40	40	40	40	40
40	40	40	40	40	40	40	40	40
40	40	40	40	40	40	40	40	40
40	40	40	40	40	40	40	40	40
40	40	40	40	40	40	40	40	40
40	40	40	40	40	40	40	40	40
40	40	40	40	40	40	40	40	40
40	40	40	40	40	40	40	40	40
40	40	40	40	40	40	40	40	40
40	40	40	40	40	40	40	40	40
40	40	40	40	40	40	40	40	40
40	40	40	40	40	40	40	40	40
40	40	40	40	40	40	40	40	40
40	40	40	40	40	40	40	40	40
40	40	40	40	40	40	40	40	40
40	40	40	40	40	40	40	40	40
40	40	40	40	40	40	40	40	40
40	40	40	40	40	40	40	40	40
40	40	40	40	40	40	40	40	40
40	40	40	40	40	40	40	40	40
40	40	40	40	40	40	40	40	40
40	40	40	40	40	40	40	40	40
40	40	40	40	40	40	40	40	40
40	40	40	40	40	40	40	40	40
40	40	40	40	40	40	40	40	40
40	40	40	40	40	40	40	40	40
40	40	40	40	40	40	40	40	40
40	40	40	40	40	40	40	40	40
40	40	40	40	40	40	40	40	40
40	40	40	40	40	40	40	40	40
40	40	40	40	40	40	40	40	40
40	40	40	40	40	40	40	40	40
40	40	40	40	40	40	40	40	40
40	40	40	40	40	40	40	40	40
40	40	40	40	40	40	40	40	40
40	40	40	40	40	40	40	40	40
40	40	40	40	40	40	40	40	40
40	40	40	40	40	40	40	40	40
40	40	40	40	40	40	40	40	40
40	40	40	40	40	40	40	40	40
40	40	40	40	40	40	40	40	40
40	40	40	40	40	40	40	40	40
40	40	40	40	40	40	40	40	40
40	40	40	40	40	40	40	40	40
40	40	40	40	40	40	40	40	40
40	40	40	40	40	40	40	40	40
40	40	40	40	40	40	40	40	40
40	40	40	40	40	40	40	40	40
40	40	40	40	40	40	40	40	40
40	40	40	40	40	40	40	40	40
40	40	40	40	40	40	40	40	40
40	40	40	40	40	40	40	40	40
40	40	40	40	40	40	40	40	40
40	40	40	40	40	40	40	40	40
40	40	40	40	40	40	40	40	40
40	40	40	40	40	40	40	40	40
40	40	40	40	40	40	40	40	40
40	40	40	40	40	40	40	40	40
40	40	40	40	40	40	40	40	40
40	40	40	40	40	40	40	40	40
40	40	40	40	40	40	40	40	40
40	40	40	40	40	40	40	40	40
40	40	40	40	40	40	40	40	40
40	40	40	40	40	40	40	40	40
40	40	40	40	40	40	40	40	40
40	40	40	40	40	40	40	40	40
40	40	40	40	40	40	40	40	40
40	40	40	40	40	40	40	40	40
40	40	40	40	40	40	40	40	40
40	40	40	40	40	40	40	40	40
40	40	40	40	40	40	40	40	40
40	40	40	40	40	40	40	40	40
40	40	40	40	40	40	40	40	40
40	40	40	40	40	40	40	40	40
40	40	40	40	40	40	40	40	40
40	40	40	40	40	40	40	40	40
40	40	40	40	40	40	40	40	40
40	40	40	40	40	40	40	40	40
40	40	40	40	40	40	40	40	40
40	40	40	40	40	40	40	40	40
40	40	40	40	40	40	40	40	40
40	40	40	40	40	40	40	40	40
40	40	40	40	40	40	40	40	40
40	40	40	40	40	40	40	40	40
40	40	40	40	40	40	40	40	40
40	40	40	40	40	40	40	40	40
40	40	40	40	40	40	40	40	40
40	40	40	40	40	40	40	40	40
40	40	40	40	40	40	40	40	40
40	40	40	40	40	40	40	40	40
40	40	40	40	40	40	40	40	40
40	40	40	40	40	40	40	40	40
40	40	40	40	40	40	40	40	40
40	40	40	40	40	40	40	40	40
40	40	40	40	40	40	40	40	40
40	40	40	40	40	40	40	40	40
40	40	40	40	40	40	40	40	40
40	40	40	40	40	40	40	40	40
40	40	40	40	40	40	40	40	40
40	40	40	40	40	40	40	40	40
40	40	40	40	40	40	40	40	40
40	40	40	40	40	40	40	40	40
40	40	40	40	40	40	40	40	40
40	40	40	40	40	40	40	40	40
40	40	40	40	40	40	40	40	40
40	40	40	40	40	40	40	40	40
40	40	40	40	40	40	40	40	40
				40		40	40	40
				40		40	40	40
				40		40	40	40
				40		40	40	40
				40		40	40	40
				40		40	40	40
				40		40	40	40
				40		40	40	40
				40		40	40	40
				40		40	40	40
				40		40	40	40
				40		40	40	40
				40		40	40	40
				40		40	40	40
				40		40	40	40
				40		40	40	40
				40		40	40	40
				40		40	40	40
				40		40	40	40
				40		40	40	40
				40		40	40	40
				40		40	40	40
				40		40	40	40
				40		40	40	40
				40		40	40	40
				40		40	40	40
				40		40	40	40
				40		40	40	40
				40		40	40	40
				40		40	40	40
				40		40	40	40
				40		40	40	40
				40		40	40	40
				40		40	40	40
				40		40	40	40
				40		40	40	40
				40		40	40	40
				40		40	40	40
				40		40	40	40
				40		40	40	40
				40		40	40	40
				40		40	40	40
				40		40	40	40
				40		40	40	40
				40		40	40	40
				40		40	40	40
				40		40	40	40
				40		40	40	40
				40		40	40	40
				40		40	40	40
				40		40	40	40
				40		40	40	40
				40		40	40	40
				40		40	40	40
				40		40	40	40
				40		40	40	40
				40		40	40	40
				40		40	40	40
				40		40	40	40
				40		40	40	40
				40		40	40	40
				40		40	40	40
				40		40	40	40
				40		40	40	40
				40		40	40	40
				40		40	40	40
				40		40	40	40
				40		40	40	40
				40		40	40	40
				40		40	40	40
				40		40	40	40
				40		40	40	40
				40		40	40	40
				40		40	40	40
				40		40	40	40
				40		40	40	40
				40		40	40	40
				40		40	40	40
				40		40	40	40
				40		40	40	40
				40		40	40	40
				40		40	40	40
				40		40	40	40
				40		40	40	40
				40		40	40	40
				40		40	40	40
				40		40	40	40
				40		40	40	40
				40		40	40	40
				40		40	40	40
				40		40	40	40
				40		40	40	40
						40
						40
						40
						40

## Sheet: P2
reactions for which a Ct value is not obtained are set at "40"
June	July	August	September	October	November	December	January	March	April	May
40	40	40	40	30.41	40	40	40	40	40	34.68
40	40	40	40	40	40	40	40	40	40	40
40	40	40	40	40	40	40	40	40	40	40
40	40	40	40	40	40	40	40	40	40	40
40	40	40	40	40	40	40	40	40	40	40
40	40	40	40	40	40	40	40	40	40	40
40	40	40	40	40	40	40	40	40	40	40
40	40	40	40	40	40	40	40	40	40	40
40	40	40	40	40	40	40	40	40	40	40
40	40	40	40	40	40	40	40	40	40	40
40	40	40	38.41	40	40	40	40	40	31.8
40	40	40	40	40	40	40	40	40	31.33
40	40	40	40	40	40	40	40	40	32.91
40	40	40	40	40	40	40	40	40	31.99
40	40	40	40	40	40	40	40	40	32.9
40	40	40	40	40	40	40	40	40	34.46
40	40	40	40	40	40	40	40	40	33.72
40	40	40	40	40	40	40	40	40	33.2
40	40	40	40	40	40	40	40	40	31.24
40	40	40	40	31.76	40	40	40	40	30.5
40	40	40	40	34.47	40	37.11	40	40	36.29
40	40	40	40	40	40	37.45	40	40	31.65
40	40	40	40	40	40	40	40	40	40
40	40	40	40	40	40	40	40	40	40
40	40	40	40	40	40	40	40	40	40
40	40	40	40	40	40	40	40	40	40
40	40	40	40	40	40	40	40	40	40
40	40	40	40	40	40	40	40	40	40
40	40	40	40	40	40	40	40	40	40
40	40	40	40	40	40	40	40	40	40
40	40	40	40	40	40	40	40	40	40
40	40	40	40	40	40	40	40	40	40
40	40	40	40	40	40	40	40	40	40
40	40	40	40	40	40	40	40	40	40
40	40	40	40	40	40	40	40	40	40
40	40	40	40	40	40	40	40	40	40
40	40	40	40	40	40	40	40	40	40
40	40	40	40	40	40	40	40	40	40
40	40	40	40	40	40	40	40	40	40
40	40	40	40	40	40	40	40	40	40
40	40	40	40	40	40	40	40	40	40
40	40	40	40	40	40	40	40	40	40
40	40	40	40	40	40	40	40	40	40
40	40	40	40	40	40	40	40	40	40
40	40	40	40	40	40	40	40	40	40
40	40	40	40	40	40	40	40	40	40
40	40	40	40	40	40	40	40	40	40
40	40	40	40	40	40	40	40	40	40
40	40	40	40	40	40	40	40	40	40
40	40	40	40	40	40	40	40	40	40
40	40	40	40	40	40	40	40	40	40
40	40	40	40	40	40	40	40	40	40
40	40	40	40	40	40	40	40	40	40
40	40	40	40	40	40	40	40	40	40
40	40	40	40	40	40	40	40	40	40
40	40	40	40	40	40	40	40	40	40
40	40	40	40	40	40	40	40	40	40
40	40	40	40	40	40	40	40	40	40
40	40	40	40	40	40	40	40	40	40
40	40	40	40	40	40	40	40	40	40
40	40	40	40	40	40	40	40	40	40
40	40	40	40	40	40	40	40	40	40
40	40	40	40	40	40	40	40	40	40
40	40	40	40	40	40	40	40	40	40
40	40	40	40	40	40	40	40	40	40
40	40	40	40	40	40	40	40	40	40
40	40	40	40	40	40	40	40	40	40
40	40	40	40	40	40	40	40	40	40
40	40	40	40	40	40	40	40	40	40
40	40	40	40	40	40	40	40	40	40
40	40	40	40	40	40	40	40	40	40
40	40	40	40	40	40	40	40	40	40
40	40	40	40	40	40	40	40	40	40
40	40	40	40	40	40	40	40	40	40
40	40	40	40	40	40	40	40	40	40
40	40	40	40	40	40	40	40	40	40
40	40	40	40	40	40	40	40	40	40
40	40	40	40	40	40	40	40	40	40
40	40	40	40	40	40	40	40	40	40
40	40	40	40	40	40	40	40	40	40
40	40	40	40	40	40	40	40	40	40
40	40	40	40	40	40	40	40	40	40
40	40	40	40	40	40	40	40	40	40
40	40	40	40	40	40	40	40	40	40
40	40	40	40	40	40	40	40	40	40
40	40	40	40	40	40	40	40	40	40
40	40	40	40	40	40	40	40	40	40
40	40	40	40	40	40	40	40	40	40
40	40	40	40	40	40	40	40	40	40
40	40	40	40	40	40	40	40	40	40
40	40	40	40	40	40	40	40	40	40
40	40	40	40	40	40	40	40	40	40
40	40	40	40	40	40	40	40	40	40
40	40	40	40	40	40	40	40	40	40
40	40	40	40	40	40	40	40	40	40
40	40	40	40	40	40	40	40	40	40
40	40	40	40	40	40	40	40	40	40
40	40	40	40	40	40	40	40	40	40
40	40	40	40	40	40	40	40	40	40
40	40	40	40	40	40	40	40	40	40
40	40	40	40	40	40	40	40	40	40
40	40	40	40	40	40	40	40	40	40
40	40	40	40	40	40	40	40	40	40
40	40	40	40	40	40	40	40	40	40
40	40	40	40	40	40	40	40	40	40
40	40	40	40	40	40	40	40	40	40
40	40	40	40	40	40	40	40	40	40
40	40	40	40	40	40	40	40	40	40
40	40	40	40	40	40	40	40	40	40
40	40	40	40	40	40	40	40	40	40
40	40	40	40	40	40	40	40	40	40
40	40	40	40		40	40	40	40	40
40	40	40	40		40	40	40	40	40
40	40	40	40		40	40	40	40	40
40	40	40	40		40	40	40	40	40
40	40	40	40		40	40	40	40	40
40	40	40	40		40	40	40	40	40
40	40	40	40		40	40	40	40	40
40	40	40	40		40	40	40	40	40
40	40	40	40		40	40	40	40	40
40	40	40	40		40	40	40	40	40
40	40	40	40		40	40	40	40	40
40	40	40	40		40	40	40	40	40
40	40	40	40		40	40	40	40	40
40	40	40	40		40	40	40	40	40
40	40	40	40		40	40	40	40	40
40	40	40	40		40	40	40	40	40
40	40	40	40		40	40	40	40	40
40	40	40	40		40	40	40	40	40
40	40	40	40		40	40	40	40	40
40	40	40	40		40	40	40	40	40
40	40	40	40		40	40	40	40	40
40	40	40	40		40	40	40	40	40
40	40	40	40		40	40	40	40	40
40	40	40	40		40	40	40	40	40
40	40	40	40		40	40	40	40	40
40	40	40	40		40	40	40	40	40
40	40	40	40		40	40	40	40	40
40	40	40	40		40	40	40	40	40
40	40	40	40		40	40	40	40	40
40	40	40	40		40	40	40	40	40
40	40	40	40		40	40	40	40	40
40	40	40	40		40	40	40	40	40
40	40	40	40		40	40	40	40	40
40	40	40	40		40	40	40	40	40
40	40	40	40		40	40	40	40	40
40	40	40	40		40	40	40	40	40
40	40	40	40		40	40	40	40	40
40	40	40	40		40	40	40	40	40
40	40	40	40		40	40	40	40	40
40	40	40	40		40	40	40	40	40
40	40	40	40		40	40	40	40	40
40	40	40	40		40	40	40	40	40
40	40	40	40		40	40	40	40	40
40	40	40	40		40	40	40	40	40
40	40	40	40		40	40	40	40	40
40	40	40	40		40	40	40	40	40
40	40	40	40		40	40	40	40	40
40	40	40	40		40	40	40	40	40
40	40	40	40		40	40	40	40	40
40	40	40	40		40	40	40	40	40
40	40	40	40		40	40	40	40	40
40	40	40	40		40	40	40	40	40
40	40	40	40		40	40	40	40	40
40	40	40	40		40	40	40	40	40
40	40	40	40		40	40	40	40	40
40	40	40	40		40	40	40	40	40
40	40	40	40		40	40	40	40	40
40	40	40	40		40	40	40	40	40
40	40	40	40		40	40	40	40	40
40	40	40	40		40	40	40	40	40
40	40	40	40		40	40	40	40	40
40	40	40	40		40	40	40	40	40
40	40	40	40		40	40	40	40	40
40	40	40	40		40	40	40	40	40
40	40	40	40		40	40	40	40	40
40	40	40	40		40	40	40	40	40
40	40	40	40		40	40	40	40	40
40	40	40	40		40	40	40	40	40
40	40	40	40		40	40	40	40	40
40	40	40	40		40	40	40	40	40
40	40	40	40		40	40	40	40	40
40	40	40	40		40	40	40	40	40
40	40	40	40		40	40	40	40	40
40	40	40	40		40	40	40	40	40
40	40	40	40		40	40	40	40	40
40	40	40	40		40	40	40	40	40
40	40	40	40		40	40	40	40	40
40	40	40	40		40	40	40	40	40
40	40	40	40		40	40	40	40	40
40	40	40	40		40	40	40	40	40
40	40	40	40		40	40	40	40	40
40	40	40	40		40	40	40	40	40
40	40	40	40		40	40	40	40	40
40	40	40	40		40	40	40	40	40
40	40	40	40		40	40	40	40	40
40	40	40	40		40	40	40	40	40
40	40	40	40		40	40	40	40	40
40	40	40	40		40	40	40	40	40
40	40	40	40		40	40	40	40	40
40	40	40	40		40	40	40	40	40
40	40	40	40		40	40	40	40	40
40	40	40	40		40	40	40	40	40
40	40	40	40		40	40	40	40	40
40	40	40	40		40	40	40	40	40
40	40	40	40		40	40	40	40	40
40	40	40	40		40	40	40	40	40
40	40	40	40		40	40	40	40	40
40	40	40	40		40	40	40	40	40
40	40	40	40		40	40	40	40	40
40	40	40	40		40	40	40	40	40
40	40	40	40		40	40	40	40	40
40	40	40	40		40	40	40	40	40
40	40	40	40		40	40	40	40	40
40	40	40	40		40	40	40	40	40
40	40	40	40		40	40	40	40	40
40	40	40	40		40	40	40	40	40
40	40	40	40		40	40	40	40	40
40	40	40	40		40	40	40	40	40
40	40	40	40		40	40	40	40	40
40	40	40	40		40	40	40	40	40
40	40	40	40		40	40	40	40	40
40	40	40	40		40	40	40	40	40
40	40	40	40		40	40	40	40	40
40	40	40	40		40	40	40	40	40
40	40	40	40		40	40	40	40	40
40	40	40	40		40	40	40	40	40
40	40	40	40		40	40	40	40	40
40	40	40	40		40	40	40	40	40
40	40	40	40		40	40	40	40	40
40	40	40	40		40	40	40	40	40
40	40	40	40		40	40	40	40	40
40	40	40	40		40	40	40	40	40
40	40	40	40		40	40	40	40	40
40	40	40	40		40	40	40	40	40
40	40	40	40		40	40	40	40	40
40	40	40	40		40	40	40	40	40
40	40	40	40		40	40	40	40	40
40	40	40	40		40	40	40	40	40
40	40	40	40		40	40	40	40	40
40	40	40	40		40	40	40	40	40
40	40	40	40		40	40	40	40	40
40	40	40	40		40	40	40	40	40
40	40	40	40		40	40	40	40	40
40	40	40	40		40	40	40	40	40
40	40	40	40		40	40	40	40	40
40	40	40	40		40	40	40	40	40
40	40	40	40		40	40	40	40	40
40	40	40	40		40	40	40	40	40
40	40	40	40		40	40	40	40	40
40	40	40	40		40	40	40	40	40
40	40	40	40		40	40	40	40	40
40	40	40	40		40	40	40	40	40
40	40	40	40		40	40	40	40	40
40	40	40	40		40	40	40	40	40
40	40	40	40		40	40	40	40	40
40	40	40	40		40	40	40	40	40
40	40	40	40		40	40	40	40	40
40	40	40	40		40	40	40	40	40
40	40	40	40		40	40	40	40	40
40	40	40	40		40	40	40	40	40
40	40	40	40		40	40	40	40	40
40	40	40	40		40	40	40	40	40
40	40	40	40		40	40	40	40	40
40	40	40	40		40	40	40	40	40
40	40	40	40		40	40	40	40	40
40	40	40	40		40	40	40	40	40
40	40	40	40		40	40	40	40	40
40	40	40	40		40	40	40	40	40
40	40	40	40		40	40	40	40	40
40	40	40	40		40	40	40	40	40
40	40	40	40		40	40	40	40	40
40	40	40	40		40	40	40	40	40
40	40	40	40		40	40	40	40	40
40	40	40	40		40	40	40	40	40
40	40	40	40		40	40	40	40	40
40	40	40	40		40	40	40	40	40
40	40	40	40		40	40	40	40	40
40	40	40	40		40	40	40	40	40
40	40	40	40		40	40	40	40	40
40	40	40	40		40	40	40	40	40
40	40	40	40		40	40	40	40	40
40	40	40	40		40	40	40	40	40
40	40	40	40		40	40	40	40	40
40	40	40	40		40	40	40	40	40
40	40	40	40		40	40	40	40	40
40	40	40	40		40	40	40	40	40
40	40	40	40		40	40	40	40	40
40	40	40	40		40	40	40	40	40
40	40	40	40		40	40	40	40	40
40	40	40	40		40	40	40	40	40
40	40	40	40		40	40	40	40	40
40	40	40	40		40	40	40	40	40
40	40	40	40		40	40	40	40	40
40	40	40	40		40	40	40	40	40
40	40	40			40	40	40	40	40
40	40	40			40	40	40	40	40
40	40	40			40	40	40	40	40
40	40	40			40	40	40	40	40
40	40	40			40	40	40	40	40
40	40	40			40	40	40	40	40
40	40	40			40	40	40	40	40
40	40	40			40	40	40	40	40
40	40	40			40	40	40	40	40
40	40	40			40	40	40	40	40
40	40	40			40	40	40	40	40
40	40	40			40	40	40	40	40
40	40	40			40	40	40	40	40
40	40	40			40	40	40	40	40
40	40	40			40	40	40	40	40
40	40	40			40	40	40	40	40
40	40	40			40	40	40	40	40
40	40	40			40	40	40	40	40
40	40	40			40	40	40	40	40
40	40	40			40	40	40	40	40
40	40	40			40	40	40	40	40
40	40	40			40	40	40	40	40
40	40	40			40	40	40	40	40
40	40	40			40	40	40	40	40
40	40	40			40	40	40	40	40
40	40	40			40	40	40	40	40
40	40	40			40	40	40	40	40
40	40	40			40	40	40	40	40
40	40	40			40	40	40	40	40
40	40	40			40	40	40	40	40
40	40	40			40	40	40	40	40
40	40	40			40	40	40	40	40
40	40	40			40	40	40	40	40
40	40	40			40	40	40	40	40
40	40	40			40	40	40	40	40
40	40	40			40	40	40	40	40
40	40	40			40	40	40	40	40
40	40	40			40	40	40	40	40
40	40	40			40	40	40	40	40
40	40	40			40	40	40	40	40
40	40	40			40	40	40	40	40
40	40	40			40	40	40	40	40
40	40	40			40	40	40	40	40
40	40	40			40	40	40	40	40
40	40	40			40	40	40	40	40
40	40	40			40	40	40	40	40
40	40	40			40	40	40	40	40
40		40			40	40	40	40	40
40		40			40	40	40	40	40
40		40			40	40	40	40	40
40		40			40	40	40	40	40
40		40			40	40	40	40	40
40		40			40	40	40	40	40
40		40			40	40	40	40	40
40		40			40	40	40	40	40
40		40			40	40	40	40	40
40		40			40	40	40	40	40
40		40			40	40	40	40	40
40		40			40	40	40	40	40
40		40			40	40	40	40	40
40		40			40	40	40	40	40
40		40			40	40	40	40	40
40		40			40	40	40	40	40
40		40			40	40	40	40	40
40		40			40	40	40	40	40
40		40			40	40	40	40	40
40		40			40	40	40	40	40
40		40			40	40	40	40	40
40		40			40	40	40	40	40
40		40			40	40	40	40	40
40		40			40	40	40	40	40
40		40			40	40	40	40	40
40		40			40	40	40	40	40
40		40			40	40	40	40	40
40		40			40	40	40	40	40
40		40			40	40	40	40	40
40		40			40	40	40	40	40
40		40			40	40	40	40	40
40		40			40	40	40	40	40
40		40			40	40	40	40	40
40		40			40	40	40	40	40
40		40			40	40	40	40	40
40		40			40	40	40	40	40
40		40			40	40	40	40	40
40		40			40	40	40	40	40
40		40			40	40	40	40	40
40		40			40	40	40	40	40
40		40			40	40	40	40	40
40		40			40	40	40	40	40

## Sheet: P9
reactions for which a Ct value is not obtained are set at "40"
June	July	August	September	October	November	December	January	February	March	April	May
36.98	32.43	40	36.57	40	40	40	40	40	40	40	40
40	31.11	40	40	40	40	40	40	40	40	40	40
40	40	40	40	40	40	40	40	40	40	40	40
40	40	40	40	40	40	40	40	40	40	40	40
40	40	40	40	40	40	40	40	40	40	40	40
40	40	31.89	40	40	40	40	40	40	40	40	40
40	40	40	40	40	40	40	40	40	40	40	40
40	40	40	40	40	40	40	40	40	40	40	40
40	40	29.48	40	40	40	40	40	40	40	40	40
40	40	40	40	40	40	40	40	40	40	40	40
40			40	40	40	40	40	40	40	40	40
40			40	40	40	40	40	40	40	40	40
40			40	40	40	40	40	40	40	40	40
40			40	40	40	40	40	40	40	40	40
40			40	40	40	40	40	40	40	40	40
40			40	40	40	40	40	40	40	40	40
40			40	40	40	40	40	40	40	40	40
40			40	40	40	40	40	40	40	40	40
40			40	40	40	40	40	40	40	40	40
40			40	40	40	40	40	40	40	40	40
40				40	40	40	40	40	40	40	40
40				40	40	40	40	40	40	40	35.64
40				40	40	40	40	40	40	40	40
40				40	40	40	40	40	40	40	40
40				40	40	40	40	40	40	40	40
40				40	40	40	40	40	40	40	40
40				40	40	40	40	40	40	40	40
40				40	40	40	40	40	40	40	40
40				40	40	40	40	40	40	40	40
40				40	40	40	40	40	40	40	40
40				40	40	40	40	40	40	40	40
40				40	40	40	40	40	40	40	40
40				40	40	40	40	40	40	40	40
40				40	40	40	40	40	40	40	40
40				40	40	40	40	40	40	40	40
40				40	40	40	40	40	40	40	40
40				40	40	40	40	40	40	40	40
40				40	40	40	40	40	40	40	40
40				40	40	40	40	40	40	40	40
40				40	40	40	40	40	40	40	40
40				40	40	40	40	40	40	40	40
40				40	40	40	40	40	40	40	40
40				40	40	40	40	40	40	40	40
40				40	40	40	40	40	40	40	40
40				40	40	40	40	40	40	40	40
40				40	40	40	40	40	40	40	40
40				40	40	40	40	40	40	40	40
40				40	40	40	40	40	40	40	40
40				40	40	40	40	40	40	40	40
40				40	40	40	40	40	40	40	40
40				40	40	40	40	40	40	40	40
40				40	40	40	40	40	40	40	40
40				40	40	40	40	40	40	40	40
40				40	40	40	40	40	40	40	40
40				40	40	40	40	40	40	40	40
40				40	40	40	40	40	40	40	40
40				40	40	40	40	40	40	40	40
40				40	40	40	40	40	40	40	40
40				40	40	40	40	40	40	40	40
40				40	40	40	40	40	40	40	40
40				40	40	40	40	40	40	40	40
40				40	40	40	40	40	40	40	40
40				40	40	40	40	40	40	40	40
40				40	40	40	40	40	40	40	40
40				40	40	40	40	40	40	40	40
40				40	40	40	40	40	40	40	40
40				40	40	40	40	40	40	40	40
40				40	40	40	40	40	40	40	40
40				40	40	40	40	40	40	40	40
40				40	40	40	40	40	40	40	40
40				40	40	40	40	40	40	40	40
40				40	40	40	40	40	40	40	40
40				40	40	40	40	40	40	40	40
40				40	40	40	40	40	40	40	40
40				40	40	40	40	40	40	40	40
40				40	40	40	40	40	40	40	40
40				40	40	40	40	40	40	40	40
40				40	40	40	40	40	40	40	40
40				40	40	40	40	40	40	40	40
40				40	40	40	40	40	40	40	40
40				40	40	40	40	40	40	40	40
40				40	40	40	40	40	40	40	40
40				40	40	40	40	40	40	40	40
40				40	40	40	40	40	40	40	40
40				40	40	40	40	40	40	40	40
40				40	40	40	40	40	40	40	40
40				40	40	40	40	40	40	40	40
40				40	40	40	40	40	40	40	40
40				40	40	40	40	40	40	40	40
40				40	40	40	40	40	40	40	40
40				40	40	40	40	40	40	40	40
40				40	40	40	40	40	40	40	40
40				40	40	40	40	40	40	40	40
40				40	40	40	40	40	40	40	40
40				40	40	40	40	40	40	40	40
40				40	40	40	40	40	40	40	40
40				40	40	40	40	40	40	40	40
40				40	40	40	40	40	40	40	40
40				40	40	40	40	40	40	40	40
40				40	40	40	40	40	40	40	40
40				40	40	40	40	40	40	40	40
40				40	40	40	40	40	40	40	40
40				40	40	40	40	40	40	40	40
40				40	40	40	40	40	40	40	40
40				40	40	40	40	40	40	40	40
40				40	40	40	40	40	40	40	40
40				40	40	40	40	40	40	40	40
40				40	40	40	40	40	40	40	40
40				40	40	40	40	40	40	40	40
40				40	40	40	40	40	40	40	40
40				40	40	40	40	40	40	40	40
40				40	40	40	40	40	40	40	40
				40	40	40	40	40	40	40	40
				40	40	40	40	40	40	40	40
				40	40	40	40	40	40	40	40
				40	40	40	40	40	40	40	40
				40	40	40	40	40	40	40	40
				40	40	40	40	40	40	40	40
				40	40	40	40	40	40	40	40
				40	40	40	40	40	40	40	40
				40	40	40	40	40	40	40	40
				40	40	40	40	40	40	40	40
				40	40	40	40	40	40	40	40
				40	40	40	40	40	40	40	40
				40	40	40	40	40	40	40	40
				40	40	40	40	40	40	40	40
				40	40	40	40	40	40	40	40
				40	40	40	40	40	40	40	40
				40	40	40	40	40	40	40	40
				40	40	40	40	40	40	40	40
				40	40	40	40	40	40	40	40
				40	40	40	40	40	40	40	40
				40	40	40	40	40	40	40	40
				40	40	40	40	40	40	40	40
				40	40	40	40	40	40	40	40
				40	40	40	40	40	40	40	40
				40	40	40	40	40	40	40	40
				40	40	40	40	40	40	40	40
				40	40	40	40	40	40	40	40
				40	40	40	40	40	40	40	40
				40	40	40	40	40	40	40	40
				40	40	40	40	40	40	40	40
				40	40	40	40	40	40	40	40
				40	40	40	40	40	40	40	40
				40	40	40	40	40	40	40	40
				40	40	40	40	40	40	40	40
				40	40	40	40	40	40	40	40
				40	40	40	40	40	40	40	40
				40	40	40	40	40	40	40	40
				40	40	40	40	40	40	40	40
				40	40	40	40	40	40	40	40
				40	40	40	40	40	40	40	40
				40	40	40	40	40	40	40	40
				40	40	40	40	40	40	40	40
				40	40	40	40	40	40	40	40
				40	40	40	40	40	40	40	40
				40	40	40	40	40	40	40	40
				40	40	40	40	40	40	40	40
				40	40	40	40	40	40	40	40
				40	40	40	40	40	40	40	40
				40	40	40	40	40	40	40	40
				40	40	40	40	40	40	40	40
				40	40	40	40	40	40	40	40
				40	40	40	40	40	40	40	40
				40	40	40	40	40	40	40	40
				40	40	40	40	40	40	40	40
				40	40	40	40	40	40	40	40
				40	40	40	40	40	40	40	40
				40	40	40	40	40	40	40	40
				40	40	40	40	40	40	40	40
				40	40	40	40	40	40	40	40
				40	40	40	40	40	40	40	40
				40	40	40	40	40	40	40	40
				40	40	40	40	40	40	40	40
				40	40	40	40	40	40	40	40
				40	40	40	40	40	40	40	40
				40	40	40	40	40	40	40	40
				40	40	40	40	40	40	40	40
				40	40	40	40	40	40	40	40
				40	40	40	40	40	40	40	40
				40	40	40	40	40	40	40	40
				40	40	40	40	40	40	40	40
				40	40	40	40	40	40	40	40
				40	40	40	40	40	40	40	40
				40	40	40	40	40	40	40	40
				40	40	40	40	40	40	40	40
				40	40	40	40	40	40	40	40
				40	40	40	40	40	40	40	40
				40	40	40	40	40	40	40	40
				40	40	40	40	40	40	40	40
				40	40	40	40	40	40	40	40
				40	40	40	40	40	40	40	40
				40	40	40	40	40	40	40	40
				40	40	40	40	40	40	40	40
				40	40	40	40	40	40	40	40
				40	40	40	40	40	40	40	40
				40	40	40	40	40	40	40	40
				40	40	40	40	40	40	40	40
				40	40	40	40	40	40	40	40
				40	40	40	40	40	40	40	40
				40	40	40	40	40	40	40	40
				40	40	40	40	40	40	40	40
				40	40	40	40	40	40	40	40
				40	40	40	40	40	40	40	40
				40	40	40	40	40	40	40	40
				40	40	40	40	40	40	40	40
				40	40	40	40	40	40	40	40
				40	40	40	40	40	40	40	40
				40	40	40	40	40	40	40	40
				40	40	40	40	40	40	40	40
				40	40	40	40	40	40	40	40
				40	40	40	40	40	40	40	40
				40	40	40	40	40	40	40	40
				40	40	40	40	40	40	40	40
				40	40	40	40	40	40	40	40
				40	40	40	40	40	40	40	40
				40	40	40	40	40	40	40	40
				40	40	40	40	40	40	40	40
				40	40	40	40	40	40	40	40
				40	40	40	40	40	40	40	40
				40	40	40	40	40	40	40	40
				40	40	40	40	40	40	40	40
				40	40	40	40	40	40	40	40
				40	40	40	40	40	40	40	40
				40	40	40	40	40	40	40	40
				40	40	40	40	40	40	40	40
				40	40	40	40	40	40	40	40
				40	40	40	40	40	40	40	40
				40	40	40	40	40	40	40	40
				40	40	40	40	40	40	40	40
				40	40	40	40	40	40	40	40
				40	40	40	40	40	40	40	40
				40	40	40	40	40	40	40	40
				40	40	40	40	40	40	40	40
				40	40	40	40	40	40	40	40
				40	40	40	40	40	40	40	40
				40	40	40	40	40	40	40	40
				40	40	40	40	40	40	40	40
				40	40	40	40	40	40	40	40
				40	40	40	40	40	40	40	40
				40	40	40	40	40	40	40	40
				40	40	40	40	40	40	40	40
				40	40	40	40	40	40	40	40
				40	40	40	40	40	40	40	40
				40	40	40	40	40	40	40	40
				40	40	40	40	40	40	40	40
				40	40	40	40	40	40	40	40
				40	40	40	40	40	40	40	40
				40	40	40	40	40	40	40	40
				40	40	40	40	40	40	40	40
				40	40	40	40	40	40	40	40
				40	40	40	40	40	40	40	40
				40	40	40	40	40	40	40	40
				40	40	40	40	40	40	40	40
				40	40	40	40	40	40	40	40
				40	40	40	40	40	40	40	40
				40	40	40	40	40	40	40	40
				40	40	40	40	40	40	40	40
				40	40	40	40	40	40	40	40
				40	40	40	40	40	40	40	40
				40	40	40	40	40	40	40	40
				40	40	40	40	40	40	40	40
				40	40	40	40	40	40	40	40
				40	40	40	40	40	40	40	40
				40	40	40	40	40	40	40	40
				40	40	40	40	40	40	40	40
				40	40	40	40	40	40	40	40
				40	40	40	40	40	40	40	40
				40	40	40	40	40	40	40	40
				40	40	40	40	40	40	40	40
				40	40	40	40	40	40	40	40
				40	40	40	40	40	40	40	40
				40	40	40	40	40	40	40	40
				40	40	40	40	40	40	40	40
				40	40	40	40	40	40	40	40
				40	40	40	40	40	40	40	40
				40	40	40	40	40	40	40	40
				40	40	40	40	40	40	40	40
				40	40	40	40	40	40	40	40
				40	40	40	40	40	40	40	40
				40	40	40	40	40	40	40	40
				40	40	40	40	40	40	40	40
				40	40	40	40	40	40	40	40
				40	40	40	40	40	40	40	40
				40	40	40	40	40	40	40	40
				40	40	40	40	40	40	40	40
				40	40	40	40	40	40	40	40
				40	40	40	40	40	40	40	40
				40	40	40	40	40	40	40	40
				40	40	40	40	40	40	40	40
				40	40	40	40	40	40	40	40
				40	40	40	40	40	40	40	40
				40	40	40	40	40	40	40	40
				40	40	40	40	40	40	40	40
				40	40	40	40	40	40	40	40
				40	40	40	40	40	40	40	40
				40	40	40	40	40	40	40	40
				40	40	40	40	40	40	40	40
				40	40	40	40	40	40	40	40
				40	40	40	40	40	40	40	40
				40	40	40	40	40	40	40	40
				40	40	40	40	40	40	40	40
				40	40	40	40	40	40	40	40
				40	40	40	40	40	40	40	40
				40	40	40	40	40	40	40	40
				40	40	40	40	40	40	40	40
				40	40	40	40	40	40	40	40
				40	40	40	40	40	40	40	40
				40	40	40	40	40	40	40	40
				40	40	40	40	40	40	40	40
				40	40	40	40	40	40	40	40
				40	40	40	40	40	40	40	40
				40	40	40	40	40	40	40	40
				40	40	40	40	40	40	40	40
				40	40	40	40	40	40	40	40
				40	40	40	40	40	40	40	40
				40	40	40	40	40	40	40	40
				40	40	40	40	40	40	40	40
				40	40	40	40	40	40	40	40
				40	40	40	40	40	40	40	40
				40	40	40	40	40	40	40	40
				40	40	40	40	40	40	40	40
				40	40	40	40	40	40	40	40
				40	40	40	40	40	40	40	40
				40	40	40	40	40	40	40	40
				40	40	40	40	40	40	40	40
				40	40	40	40	40	40	40	40
				40	40	40	40	40	40	40	40
				40	40	40	40	40	40	40	40
				40	40	40	40	40	40	40	40
				40	40	40	40	40	40	40	40
				40	40	40	40	40	40	40	40
				40	40	40	40	40	40	40	40
				40	40	40	40	40	40	40	40
				40	40	40	40	40	40	40	40
				40	40	40	40	40	40	40	40
				40	40	40	40	40	40	40	40
				40	40	40	40	40	40	40	40
				40	40	40	40	40	40	40	40
				40	40	40	40	40	40	40	40
				40	40	40	40	40	40	40	40
				40	40	40	40	40	40	40	40
				40	40	40	40	40	40	40	40
				40	40	40	40	40	40	40	40
				40	40	40	40	40	40	40	40
				40	40	40	40	40	40	40	40
				40	40	40	40	40	40	40	40
				40	40	40	40	40	40	40	40
				40	40	40	40	40	40	40	40
				40	40	40	40	40	40	40	40
				40	40	40	40	40	40	40	40
				40	40	40	40	40	40	40	40
				40	40	40	40	40	40	40	40
				40	40	40	40	40	40	40	40
				40	40	40	40	40	40	40	40
				40	40	40	40	40	40	40	40
				40	40	40	40	40	40	40	40
				40	40	40	40	40	40	40	40
				40	40	40	40	40	40	40	40
				40	40	40	40	40	40	40	40
				40	40	40	40	40	40	40	40
				40	40	40	40	40	40	40	40
				40	40	40	40	40	40	40	40
				40	40	40	40	40	40	40	40
				40	40	40	40	40	40	40	40
				40	40	40	40	40	40	40	40
				40	40	40	40	40	40	40	40
				40	40	40	40	40	40	40	40
				40	40	40	40	40	40	40	40
				40	40	40	40	40	40	40	40
				40	40	40	40	40	40	40	40
				40	40	40	40	40	40	40	40
				40	40	40	40	40	40	40	40
				40	40	40	40	40	40	40	40
				40	40	40	40	40	40	40	40
				40	40	40	40	40	40	40	40
				40	40	40	40	40	40	40	40
				40	40	40	40	40	40	40	40
				40	40	40	40	40	40	40	40
				40	40	40	40	40	40	40	40
				40	40	40	40	40	40	40	40
				40	40	40	40	40	40	40	40
				40	40	40	40	40	40	40	40
				40	40	40	40	40	40	40	40
				40	40	40	40	40	40	40	40
				40	40	40	40	40	40	40	40
				40	40	40	40	40	40	40	40
				40	40	40	40	40	40	40	40

## Sheet: P10
reactions for which a Ct value is not obtained are set at "40"
June	July	August	September	October	November	December	January	February	March	April	May
29.89	27.17	27.73	32.93	40	35.5	35.06	40	31.09	29.32	32.57	30.91
31.46	40	40	30.53	40	40	40	40	40	35.93	33.21	32.06
35.35	40	40	31.33	40	40	40	40	40	40	31.48	40
40	40	40	34.77	40	40	40	40	40	40	40	40
40	40	40	40	40	40	40	40	40	40	40	40
40	40	40	40	40	40	40	40	40	40	40	33.39
40	40	40	40	40	40	40	40	40	40	40	29.61
40	40	40	40	40	40	40	40	40	40	40	40
40	40	40	40	40	40	40	40	40	40	40	40
40	40	40	40	40	40	40	40	40	40	40	40
40		33.45		40			40
40		35.02		40			40
40		33.41		40			40
40		35.73		40			40
40		30.37		40			40
40		40		40			40
40		40		40			40
40		40		40			40
40		40		40			40
40		40		40			40
		40		32.41			40
		40		35.34			40
		40		32.17			40
		40		36.3			40
		40		30.29			40
		40		32.25			40
		40		36.3			40
		40		36.03			40
		40		40			40
		40		40			40
		40		40			40
		40		40			40
		40		40			40
		40		40			40
		40		40			40
		40		40			40
		40		40			40
		40		40			40
		40		40			40
		40		40			40
		40		40			40
		40		40			40
		40		40			40
		40		40			40
		40		40			40
		40		40			40
		40		40			40
		40		40			40
		40		40			40
		40		40			40
		40		40			40
		40		40			40
		40		40			40
		40		40			40
		40		40			40
		40		40			40
		40		40			40
		40		40			40
		40		40			40
		40		40			40
		40		40			40
		40		40			40
		40		40			40
		40		40			40
		40		40			40
		40		40			40
		40		40			40
		40		40			40
		40		40			40
		40		40			40
		40		40			40
		40		40			40
		40		40			40
		40		40			40
		40		40			40
		40		40			40
		40		40			40
		40		40			40
		40		40			40
		40		40			40
		40		40			40
		40		40			40
		40		40			40
		40		40			40
		40		40			40
		40		40			40
		40		40			40
		40		40			40
		40		40			40
		40		40			40
		40		40			40
		40		40			40
		40		40			40
		40		40			40
		40		40			40
		40		40			40
		40		40			40
		40		40			40
		40		40			40
		40		40			40
		40		40			40
		40		40			40
		40		40			40
		40		40			40
		40		40			40
		40		40			40
		40		40			40
		40		40			40
		40		40			40
		40		40			40
		40		40			40
		40		40			40
							40
							40
							40
							40
							40
							40
							40
							40
							40
							40
							40
							40
							40
							40
							40
							40
							40
							40
							40
							40
							40
							40
							40
							40
							40
							40
							40
							40
							40
							40
							40
							40
							40
							40
							40
							40
							40
							40
							40
							40
							40
							40
							40
							40
							40
							40
							40
							40
							40
							40
							40
							40
							40
							40
							40
							40
							40
							40
							40
							40
							40
							40
							40
							40
							40
							40
							40
							40
							40
							40
							40
							40
							40
							40
							40
							40
							40
							40
							40
							40
							40
							40
							40
							40
							40
							40
							40
							40
							40
							40
							40
							40
							40
							40
							40
							40
							40
							40
							40
							40
							40
							40
							40
							40
							40
							40
							40
							40
							40
							40
							40
							40
							40
							40
							40
							40
							40
							40
							40
							40
							40
							40
							40
							40
							40
							40
							40
							40
							40
							40
							40
							40
							40
							40
							40
							40
							40
							40
							40
							40
							40
							40
							40
							40
							40
							40
							40
							40
							40
							40
							40
							40
							40
							40
							40
							40
							40
							40
							40
							40
							40
							40
							40
							40
							40
							40
							40
							40
							40
							40
							40
							40
							40
							40
							40
							40
							40
							40
							40
							40
							40
							40
							40
							40
							40
							40
							40
							40
							40
							40
							40
							40
							40
							40
							40
							40
							40
							40
							40
							40
							40
							40
							40
							40
							40
							40
							40
							40
							40
							40
							40
							40
							40
							40
							40
							40
							40
							40
							40
							40
							40
							40
							40
							40
							40
							40
							40
							40
							40
							40
							40
							40
							40
							40
							40
							40
							40
							40
							40
							40
							40
							40
							40
							40
							40
							40
							40
							40
							40
							40
							40
							40
							40
							40
							40
							40
							40
							40
							40
							40
							40
							40
							40
							40
							40
							40
							40
							40
							40
							40
							40
							40
							40
							40
							40
							40

## Sheet: P11
reactions for which a Ct value is not obtained are set at "40"
June	July	August	September	October	November	December	January	February	March	April	May
35.84	31.02	36.33	35.68	40	29.94	40	40	31.24	40	40	40
36.74	36.53	36.54	36.46	40	40	40	40	40	40	40	40
40	40	40	40	40	40	40	40	40	40	40	40
40	40	40	40	40	40	40	40	40	40	40	40
40	40	40	40	40	40	40	40	40	40	40	40
40	40	40	40	40	40	40	40	40	40	40	40
40	40	40	40	40	40	40	40	40	40	40	40
40	40	40	40	40	40	40	40	40	40	40	40
40	40	40	40	40	40	40	40	40	40	40	40
40	40	40	40	40	40	40	40	40	40	40	40
40		40	40	40		40	40		40	40	40
40		40	40	40		40	40		40	40	40
40		40	40	40		40	40		40	40	40
40		40	40	40		40	40		40	40	40
40		40	40	40		40	40		40	40	40
40		40	40	40		40	40		40	40	40
40		40	40	40		40	40		40	40	40
40		40	40	40		40	40		40	40	40
40		40	40	40		40	40		40	40	40
40		40	40	40		40	40		40	40	40
40		40	40	40		37.33	36.66		40	40	36.34
40		40	40	40		30.44	35.14		40	40	37.46
40		40	40	40		36.18	36.27		40	40	36.38
40		40	40	40		33.31	31.61		40	40	37.13
40		40	40	40		37.32	40		40	40	37.74
40		40	40	40		30.58	40		40	40	40
40		40	40	40		31.88	40		40	40	40
40		40	40	40		36.41	40		40	40	40
40		40	40	40		35.22	40		40	40	40
40		40	40	40		32.39	40		40	40	40
40		40	40	40		39.05	40		40	40	40
40		40	40	40		31.37	40		40	40	40
40		40	40	40		37.61	40		40	40	40
40		40	40	40		36	40		40	40	40
40		40	40	40		40	40		40	40	40
40		40	40	40		40	40		40	40	40
40		40	40	40		40	40		40	40	40
40		40	40	40		40	40		40	40	40
40		40	40	40		40	40		40	40	40
40		40	40	40		40	40		40	40	40
40		40	40	40		40	40		40	40	40
40		40	40	40		40	40		40	40	40
40		40	40	40		40	40		40	40	40
40		40	40	40		40	40		40	40	40
40		40	40	40		40	40		40	40	40
40		40	40	40		40	40		40	40	40
40		40	40	40		40	40		40	40	40
40		40	40	40		40	40		40	40	40
40		40	40	40		40	40		40	40	40
40		40	40	40		40	40		40	40	40
40		40	40	40		40	40		40	40	40
40		40	40	40		40	40		40	40	40
40		40	40	40		40	40		40	40	40
40		40	40	40		40	40		40	40	40
40		40	40	40		40	40		40	40	40
40		40	40	40		40	40		40	40	40
40		40	40	40		40	40		40	40	40
40		40	40	40		40	40		40	40	40
40		40	40	40		40	40		40	40	40
40		40	40	40		40	40		40	40	40
40		40	40	40		40	40		40	40	40
40		40	40	40		40	40		40	40	40
40		40	40	40		40	40		40	40	40
40		40	40	40		40	40		40	40	40
40		40	40	40		40	40		40	40	40
40		40	40	40		40	40		40	40	40
40		40	40	40		40	40		40	40	40
40		40	40	40		40	40		40	40	40
40		40	40	40		40	40		40	40	40
40		40	40	40		40	40		40	40	40
40		40	40	40		40	40		40	40	40
40		40	40	40		40	40		40	40	40
40		40	40	40		40	40		40	40	40
40		40	40	40		40	40		40	40	40
40		40	40	40		40	40		40	40	40
40		40	40	40		40	40		40	40	40
40		40	40	40		40	40		40	40	40
40		40	40	40		40	40		40	40	40
40		40	40	40		40	40		40	40	40
40		40	40	40		40	40		40	40	40
40		40	40	40		40	40		40	40	40
40		40	40	40		40	40		40	40	40
40		40	40	40		40	40		40	40	40
40		40	40	40		40	40		40	40	40
40		40	40	40		40	40		40	40	40
40		40	40	40		40	40		40	40	40
40		40	40	40		40	40		40	40	40
40		40	40	40		40	40		40	40	40
40		40	40	40		40	40		40	40	40
40		40	40	40		40	40		40	40	40
40		40	40	40		40	40		40	40	40
40		40	40	40		40	40		40	40	40
40		40	40	40		40	40		40	40	40
40		40	40	40		40	40		40	40	40
40		40	40	40		40	40		40	40	40
40		40	40	40		40	40		40	40	40
40		40	40	40		40	40		40	40	40
40		40	40	40		40	40		40	40	40
40		40	40	40		40	40		40	40	40
40		40	40	40		40	40		40	40	40
40		40	40	40		40	40		40	40	40
40		40	40	40		40	40		40	40	40
40		40	40	40		40	40		40	40	40
40		40	40	40		40	40		40	40	40
40		40	40	40		40	40		40	40	40
40		40	40	40		40	40		40	40	40
40		40	40	40		40	40		40	40	40
40		40	40	40		40	40		40	40	40
40		40	40	40		40	40		40	40	40
40		40	40	40		40	40		40	40	40
40		40	40	40		40	40		40	40	40
40		40	40	40		40	40		40	40	40
		40		40		40	35.26		40	40	40
		40		40		40	34.95		40	40	40
		40		40		40	40		40	40	40
		40		40		40	40		40	40	40
		40		40		40	40		40	40	40
		40		40		40	40		40	40	40
		40		40		40	40		40	40	40
		40		40		40	40		40	40	40
		40		40		40	40		40	40	40
		40		40		40	40		40	40	40
		40		40		40	40		40	40	40
		40		40		40	40		40	40	40
		40		40		40	40		40	40	40
		40		40		40	40		40	40	40
		40		40		40	40		40	40	40
		40		40		40	40		40	40	40
		40		40		40	40		40	40	40
		40		40		40	40		40	40	40
		40		40		40	40		40	40	40
		40		40		40	40		40	40	40
		40		40		40	40		40	40	40
		40		40		40	40		40	40	40
		40		40		40	40		40	40	40
		40		40		40	40		40	40	40
		40		40		40	40		40	40	40
		40		40		40	40		40	40	40
		40		40		40	40		40	40	40
		40		40		40	40		40	40	40
		40		40		40	40		40	40	40
		40		40		40	40		40	40	40
		40		40		40	40		40	40	40
		40		40		40	40		40	40	40
		40		40		40	40		40	40	40
		40		40		40	40		40	40	40
		40		40		40	40		40	40	40
		40		40		40	40		40	40	40
		40		40		40	40		40	40	40
		40		40		40	40		40	40	40
		40		40		40	40		40	40	40
		40		40		40	40		40	40	40
		40		40		40	40		40	40	40
		40		40		40	40		40	40	40
		40		40		40	40		40	40	40
		40		40		40	40		40	40	40
		40		40		40	40		40	40	40
		40		40		40	40		40	40	40
		40		40		40	40		40	40	40
		40		40		40	40		40	40	40
		40		40		40	40		40	40	40
		40		40		40	40		40	40	40
		40		40		40	40		40	40	40
		40		40		40	40		40	40	40
		40		40		40	40		40	40	40
		40		40		40	40		40	40	40
		40		40		40	40		40	40	40
		40		40		40	40		40	40	40
		40		40		40	40		40	40	40
		40		40		40	40		40	40	40
		40		40		40	40		40	40	40
		40		40		40	40		40	40	40
		40		40		40	40		40	40	40
		40		40		40	40		40	40	40
		40		40		40	40		40	40	40
		40		40		40	40		40	40	40
		40		40		40	40		40	40	40
		40		40		40	40		40	40	40
		40		40		40	40		40	40	40
		40		40		40	40		40	40	40
		40		40		40	40		40	40	40
		40		40		40	40		40	40	40
		40		40		40	40		40	40	40
		40		40		40	40		40	40	40
		40		40		40	40		40	40	40
		40		40		40	40		40	40	40
		40		40		40	40		40	40	40
		40		40		40	40		40	40	40
		40		40		40	40		40	40	40
		40		40		40	40		40	40	40
		40		40		40	40		40	40	40
		40		40		40	40		40	40	40
		40		40		40	40		40	40	40
		40		40		40	40		40	40	40
		40		40		40	40		40	40	40
		40		40		40	40		40	40	40
		40		40		40	40		40	40	40
		40		40		40	40		40	40	40
		40		40		40	40		40	40	40
		40		40		40	40		40	40	40
		40		40		40	40		40	40	40
		40		40		40	40		40	40	40
		40		40		40	40		40	40	40
		40		40		40	40		40	40	40
		40		35.56		40	35.21		40	40	40
		40		39.64		40	36.25		40	40	40
		40		40		40	37.4		40	40	40
		40		40		40	36.05		40	40	40
		40		40		40	31.67		40	40	40
		40		40		40	32.44		40	40	40
		40		40		40	35.42		40	40	40
		40		40		40	32.14		40	40	40
		40		40		40	40		40	40	40
		40		40		40	40		40	40	40
		40		40		40	40		40	40	40
		40		40		40	40		40	40	40
		40		40		40	40		40	40	40
		40		40		40	40		40	40	40
		40		40		40	40		40	40	40
		40		40		40	40		40	40	40
		40		40		40	40		40	40	40
		40		40		40	40		40	40	40
		40		40		40	40		40	40	40
		40		40		40	40		40	40	40
		40		40		40	40		40	40	40
		40		40		40	40		40	40	40
		40		40		40	40		40	40	40
		40		40		40	40		40	40	40
		40		40		40	40		40	40	40
		40		40		40	40		40	40	40
		40		40		40	40		40	40	40
		40		40		40	40		40	40	40
		40		40		40	40		40	40	40
		40		40		40	40		40	40	40
		40		40		40	40		40	40	40
		40		40		40	40		40	40	40
		40		40		40	40		40	40	40
		40		40		40	40		40	40	40
		40		40		40	40		40	40	40
		40		40		40	40		40	40	40
		40		40		40	40		40	40	40
		40		40		40	40		40	40	40
		40		40		40	40		40	40	40
		40		40		40	40		40	40	40
		40		40		40	40		40	40	40
		40		40		40	40		40	40	40
		40		40		40	40		40	40	40
		40		40		40	40		40	40	40
		40		40		40	40		40	40	40
		40		40		40	40		40	40	40
		40		40		40	40		40	40	40
		40		40		40	40		40	40	40
		40		40		40	40		40	40	40
		40		40		40	40		40	40	40
		40		40		40	40		40	40	40
		40		40		40	40		40	40	40
		40		40		40	40		40	40	40
		40		40		40	40		40	40	40
		40		40		40	40		40	40	40
		40		40		40	40		40	40	40
		40		40		40	40		40	40	40
		40		40		40	40		40	40	40
		40		40		40	40		40	40	40
		40		40		40	40		40	40	40
		40		40		40	40		40	40	40
		40		40		40	40		40	40	40
		40		40		40	40		40	40	40
		40		40		40	40		40	40	40
		40		40		40	40		40	40	40
		40		40		40	40		40	40	40
		40		40		40	40		40	40	40
		40		40		40	40		40	40	40
		40		40		40	40		40	40	40
		40		40		40	40		40	40	40
		40		40		40	40		40	40	40
		40		40		40	40		40	40	40
		40		40		40	40		40	40	40
		40		40		40	40		40	40	40
		40		40		40	40		40	40	40
		40		40		40	40		40	40	40
		40		40		40	40		40	40	40
		40		40		40	40		40	40	40
		40		40		40	40		40	40	40
		40		40		40	40		40	40	40
		40		40		40	40		40	40	40
		40		40		40	40		40	40	40
		40		40		40	40		40	40	40
		40		40		40	40		40	40	40
		40		40		40	40		40	40	40
		40		40		40	40		40	40	40
		40		40		40	40		40	40	40
		40		40		40	40		40	40	40
		40		40		40	40		40	40	40
		40		40		40	40		40	40	40
		40		40		40	40		40	40	40
		40		40		40	40		40	40	40
		40		36.39		40	32.27		40	40	40
		40		36.13		40	34.51		40	40	40
		40		35.37		40	40		40	40	40
		40		33.64		40	40		40	40	40
		40		40		40	40		40	40	40
		40		40		40	40		40	40	40
		40		40		40	40		40	40	40
		40		40		40	40		40	40	40
		40		40		40	40		40	40	40
		40		40		40	40		40	40	40
		40		40		40	40		40	40	40
		40		40		40	40		40	40	40
		40		40		40	40		40	40	40
		40		40		40	40		40	40	40
		40		40		40	40		40	40	40
		40		40		40	40		40	40	40
		40		40		40	40		40	40	40
		40		40		40	40		40	40	40
		40		40		40	40		40	40	40
		40		40		40	40		40	40	40
		40		40		40	40		40	40	40
		40		40		40	40		40	40	40
		40		40		40	40		40	40	40
		40		40		40	40		40	40	40
		40		40		40	40		40	40	40
		40		40		40	40		40	40	40
		40		40		40	40		40	40	40
		40		40		40	40		40	40	40
		40		40		40	40		40	40	40
		40		40		40	40		40	40	40
		40		40		40	40		40	40	40
		40		40		40	40		40	40	40
		40		40		40	40		40	40	40
		40		40		40	40		40	40	40
		40		40		40	40		40	40	40
		40		40		40	40		40	40	40
		40		40		40	40		40	40	40
		40		40		40	40		40	40	40
		40		40		40	40		40	40	40
		40		40		40	40		40	40	40
		40		40		40	40		40	40	40
		40		40		40	40		40	40	40
		40		40		40	40		40	40	40
		40		40		40	40		40	40	40
		40		40		40	40		40	40	40
		40		40		40	40		40	40	40
		40		40		40	40		40	40	40
		40		40		40	40		40	40	40
		40		40		40	40		40	40	40
		40		40		40	40		40	40	40
		40		40		40	40		40	40	40
		40		40		40	40		40	40	40
		40		40		40	40		40	40	40
		40		40		40	40		40	40	40
		40		40		40	40		40	40	40
		40		40		40	40		40	40	40
		40		40		40	40		40	40	40
		40		40		40	40		40	40	40
		40		40		40	40		40	40	40
		40		40		40	40		40	40	40
		40		40		40	40		40	40	40
		40		40		40	40		40	40	40
		40		40		40	40		40	40	40
		40		40		40	40		40	40	40
		40		40		40	40		40	40	40
		40		40		40	40		40	40	40
		40		40		40	40		40	40	40
		40		40		40	40		40	40	40
		40		40		40	40		40	40	40
		40		40		40	40		40	40	40
		40		40		40	40		40	40	40
		40		40		40	40		40	40	40
		40		40		40	40		40	40	40
		40		40		40	40		40	40	40
		40		40		40	40		40	40	40
		40		40		40	40		40	40	40
		40		40		40	40		40	40	40
		40		40		40	40		40	40	40
		40		40		40	40		40	40	40
		40		40		40	40		40	40	40
		40		40		40	40		40	40	40
		40		40		40	40		40	40	40
		40		40		40	40		40	40	40
		40		40		40	40		40	40	40
		40		40		40	40		40	40	40
		40		40		40	40		40	40	40
		40		40		40	40		40	40	40
		40		40		40	40		40	40	40
		40		40		40	40
		40		40		40	40
		40		40		40	40
		40		40		40	40

## Sheet: P3
reactions for which a Ct value is not obtained are set at "40"
June	July	August	September	October	November	December	January	February	March	April	May
40	34.75	40	31.62	40	40	30.47	33.05	35.77	33.2	40	40
40	30.78	40	34.33	40	40	34.4	40	40	36.38	40	40
40	31.81	40	35.79	40	40	33.2	40	40	40	40	40
40	28.66	40	33.19	40	40	30.18	40	40	40	40	40
40	29.43	40	34.31	40	40	30.97	40	40	40	40	40
40	40	40	31.44	40	40	40	40	40	40	40	40
40	40	40	32.28	40	40	40	40	40	40	40	40
40	40	40	40	40	40	40	40	40	40	40	40
40	40	40	40	40	40	40	40	40	40	40	40
40	40	40	40	40	40	40	40	40	40	40	40
40		36.54		40	40			40		40	40
40		38.18		40	40			40		40	40
40		36.5		40	40			40		40	40
40		36		40	40			40		40	40
40		40		40	40			40		40	40
40		40		40	40			40		40	40
40		40		40	40			40		40	40
40		40		40	40			40		40	40
40		40		40	40			40		40	40
40		40		40	40			40		40	40
40		40		34.81	40					30.38	40
40		40		31.22	40					32.34	40
40		40		31.17	40					34.33	40
40		40		30.78	40					31.43	40
40		40		32.43	40					33.12	40
40		40		34.3	40					32.62	40
40		40		38.49	40					31.65	40
40		40		40	40					40	40
40		40		40	40					40	40
40		40		40	40					40	40
40		40		40	40					40	40
40		40		40	40					40	40
40		40		40	40					40	40
40		40		40	40					40	40
40		40		40	40					40	40
40		40		40	40					40	40
40		40		40	40					40	40
40		40		40	40					40	40
40		40		40	40					40	40
40		40		40	40					40	40
40		40		40	40					40	40
40		40		40	40					40	40
40		40		40	40					40	40
40		40		40	40					40	40
40		40		40	40					40	40
40		40		40	40					40	40
40		40		40	40					40	40
40		40		40	40					40	40
40		40		40	40					40	40
40		40		40	40					40	40
40		40		40	40					40	40
40		40		40	40					40	40
40		40		40	40					40	40
40		40		40	40					40	40
40		40		40	40					40	40
40		40		40	40					40	40
40		40		40	40					40	40
40		40		40	40					40	40
40		40		40	40					40	40
40		40		40	40					40	40
40		40		40	40					40	40
40		40		40	40					40	40
40		40		40	40					40	40
40		40		40	40					40	40
40		40		40	40					40	40
40		40		40	40					40	40
40		40		40	40					40	40
40		40		40	40					40	40
40		40		40	40					40	40
40		40		40	40					40	40
40		40		40	40					40	40
40		40		40	40					40	40
40		40		40	40					40	40
40		40		40	40					40	40
40		40		40	40					40	40
40		40		40	40					40	40
40		40		40	40					40	40
40		40		40	40					40	40
40		40		40	40					40	40
40		40		40	40					40	40
40		40		40	40					40	40
40		40		40	40					40	40
40		40		40	40					40	40
40		40		40	40					40	40
40		40		40	40					40	40
40		40		40	40					40	40
40		40		40	40					40	40
40		40		40	40					40	40
40		40		40	40					40	40
40		40		40	40					40	40
40		40		40	40					40	40
40		40		40	40					40	40
40		40		40	40					40	40
40		40		40	40					40	40
40		40		40	40					40	40
40		40		40	40					40	40
40		40		40	40					40	40
40		40		40	40					40	40
40		40		40	40					40	40
40		40		40	40					40	40
40		40		40	40					40	40
40		40		40	40					40	40
40		40		40	40					40	40
40		40		40	40					40	40
40		40		40	40					40	40
40		40		40	40					40	40
40		40		40	40					40	40
40		40		40	40					40	40
40		40		40	40					40	40
40		40		40	40					40	40
40		40		40	40					40	40
40		40		40	40					40	40
40					40					40	40
40					40					40	40
40					40					40	40
40					40					40	40
40					40					40	40
40					40					40	40
40					40					40	40
40					40					40	40
40					40					40	40
40					40					40	40
40					40					40	40
40					40					40	40
40					40					40	40
40					40					40	40
40					40					40	40
40					40					40	40
40					40					40	40
40					40					40	40
40					40					40	40
40					40					40	40
40					40					40	40
40					40					40	40
40					40					40	40
40					40					40	40
40					40					40	40
40					40					40	40
40					40					40	40
40					40					40	40
40					40					40	40
40					40					40	40
40					40					40	40
40					40					40	40
40					40					40	40
40					40					40	40
40					40					40	40
40					40					40	40
40					40					40	40
40					40					40	40
40					40					40	40
40					40					40	40
40					40					40	40
40					40					40	40
40					40					40	40
40					40					40	40
40					40					40	40
40					40					40	40
40					40					40	40
40					40					40	40
40					40					40	40
40					40					40	40
40					40					40	40
40					40					40	40
40					40					40	40
40					40					40	40
40					40					40	40
40					40					40	40
40					40					40	40
40					40					40	40
40					40					40	40
40					40					40	40
40					40					40	40
40					40					40	40
40					40					40	40
40					40					40	40
40					40					40	40
40					40					40	40
40					40					40	40
40					40					40	40
40					40					40	40
40					40					40	40
40					40					40	40
40					40					40	40
40					40					40	40
40					40					40	40
40					40					40	40
40					40					40	40
40					40					40	40
40					40					40	40
40					40					40	40
40					40					40	40
40					40					40	40
40					40					40	40
40					40					40	40
40					40					40	40
40					40					40	40
40					40					40	40
40					40					40	40
40					40					40	40
40					40					40	40
40					40					40	40
40					40					40	40
40					40					40	40
40					40					40	40
40					40					40	40
40					40					40	40
40					40					40	40
40					40					40	40
40					40					40	40
40					40					40	40
40					40					40	40
40					40					40	40
40					40					40	40
40					40					40	40
40					40					40	40
40					40					40	40
40					40					40	40
40					40					40	40
40					40					40	40
40					40					40	40
40					40					40	40
40					40					40	40
40					40					40	40
40					40					40	40
40					40					40	40
40					40					40	40
40					40					40	40
40					40					40	40
40					40					40	40
40					40					40	40
40					40					40	40
40					40					40	40
40					40					40	40
40					40					40	40
40					40					40	40
40					40					40	40
40					40					40	40
40					40					40	40
40					40					40	40
40					40					40	40
40					40					40	40
40					40					40	40
40					40					40	40
40					40					40	40
40					40					40	40
40					40					40	40
40					40					40	40
40					40					40	40
40					40					40	40
40					40					40	40
40					40					40	40
40					40					40	40
40					40					40	40
40					40					40	40
40					40					40	40
40					40					40	40
40					40					40	40
40					40					40	40
40					40					40	40
40					40					40	40
40					40					40	40
40					40					40	40
40					40					40	40
40					40					40	40
40					40					40	40
40					40					40	40
40					40					40	40
40					40					40	40
40					40					40	40
40					40					40	40
40					40					40	40
40					40					40	40
40					40					40	40
40					40					40	40
40					40					40	40
40					40					40	40
40					40					40	40
40					40					40	40
40					40					40	40
40					40					40	40
40					40					40	40
40					40					40	40
40					40					40	40
40					40					40	40
40					40					40	40
40					40					40	40
40					40					40	40
40					40					40	40
40					40					40	40
40					40					40	40
40					40					40	40
40					40					40	40
40					40					40	40
40					40					40	40
40					40					40	40
40					40					40	40
40					40					40	40
40					40					40	40
40					40					40	40
40					40					40	40
40					40					40	40
40					40					40	40
40					40					40	40
40					40					40	40
40					40					40	40
40					40					40	40
40					40					40	40
40					40					40	40
40					40					40	40
40					40					40	40
40					40					40	40
40					40					40	40
40					40					40	40
40					40					40	40
40					40					40	40
40					40					40	40
40					40					40	40
40					40					40	40
40					40					40	40
40					40					40	40
40					40					40	40
40					40					40	40
40					40					40	40
40					40					40	40
40					40					40	40
40					40					40	40
40					40					40	40
40					40					40	40
40					40					40	40
40					40					40	40
40					40					40	40
40					40					40	40
40					40					40	40
40					40					40	40
40					40					40	40
40					40					40	40
40					40					40	40
40					40					40	40
40					40					40	40
40					40					40	40
40					40					40	40
40					40					40	40
40					40					40	40
40					40					40	40
40					40					40	40
40					40					40	40
40					40					40	40
40					40					40	40
40					40					40	40
40					40					40	40
40					40					40	40
40					40					40	40
40					40					40	40
40					40					40	40
40					40					40	40
40					40					40	40
40					40					40	40
40					40					40	40
40					40					40	40
40					40					40	40
40					40					40	40
40					40					40	40
40					40					40	40
40					40					40	40
40					40					40	40
40					40					40	40
40					40					40	40
40					40					40	40
40					40					40	40
40					40					40	40
40					40					40	40
40					40					40	40
40					40					40	40
40					40					40	40
40					40					40	40
40					40					40	40
40					40					40	40
40					40					40	40
40					40					40	40
40					40					40	40
40					40					40	40
40					40					40	40
40					40					40	40
40					40					40	40
40					40					40	40
40					40					40	40
40					40					40	40

## Sheet: P15
reactions for which a Ct value is not obtained are set at "40"
June	July	August	September	October	November	May
25.74	28.47	40	29.45	28.38	35.11	28.93
25.25	27.88	40	28.11	27.66	29.36	29.66
28	27.64	30.32	31.43	40	35.62	29.05
26.16	28.23	29.52	29.41	40	40	28.84
26.1	26.73	29.08	29.1	40	40	29.69
24.66	27.09	28.78	28.51	40	40	29.09
25.23	28.75	27.03	28.67	40	40	28.96
25.91	27.51	29.1	29.47	40	40	28.92
25.2	40	29.27	40	40	40	29.76
25.2	40	30.05	40	40	40	29.13

## Sheet: P16
reactions for which a Ct value is not obtained are set at "40"
June	July	August	September	October	November	May
23.23	23.63	24.34	24.31	26.48	25.27	31.35
23.38	25.3	24.59	25.04	28.31	26.47	39.43
23.86	23.02	23.95	25.25	28.09	27.14	40
24.12	23.33	24.17	25.55	27.61	40	40
23.73	21.69	28.06	24.22	27.94	40	32.03
23.33	21.63	25.33	25.46	27.22	40	40
23.75	23.2	40	25.47	28.09	40	31.87
24	23.14	25.22	25.73	27	40	32.19
23.28	21.33	23.14	25.52	26.86	40	40
22.66	21.62	24.12	25.88	26.93	40	40

## Sheet: P17
reactions for which a Ct value is not obtained are set at "40"
June	July	August	September	October	November	May
23.1	23.99	24.97	26.97	25.11	40	26.83
22.84	24.56	24.57	26.11	25.06	40	27.32
23.14	24.52	29.86	27.43	25.07	40	27.11
22.67	24.36	24.17	26.94	24.77	40	27.08
23.21	24.11	24.59	26.29	25.79	40	27.3
21.94	25.03	23.56	40	24.58	40	27.3
23.05	24.56	24.88	40	25.08	40	27.12
22.25	24.74	25.23	40	28.51	40	27.98
22.13	23.69	25.07	40	25.08	40	27.3
22.44	24.68	25.44	40	40	40	27.24
					32.36
					35.27
					40
					40
					40
					40
					40
					40
					40
					40

## Sheet: P4
reactions for which a Ct value is not obtained are set at "40"
June	July	August
40	32.46	40
40	29.45	30.85
40	33.86	40
40	31.82	29.31
40	33.26	32.57
40	34.66	40
40	30.49	40
40	40	40
40	40	40
40	40	40
40
40
40
40
40
40
40
40
40
40
40
40
40
40
40
40
40
40
40
40
40
40
40
40
40
40
40
40
40
40
40
40
40
40
40
40
40
40
40
40
40
40
40
40
40
40
40
40
40
40
40
40
40
40
40
40
40
40
40
40
40
40
40
40
40
40
40
40
40
40
40
40
40
40
40
40
40
40
40
40
40
40
40
40
40
40
40
40
40
40
40
40
40
40
40
40
40
40
40
40
40
40
40
40
40
40
40
40
40
40
40
40
40
40
40
40
40
40
40
40
40
40
40
40
40
40
40
40
40
40
40
40
40
40
40
40
40
40
40
40
40
40
40
40
40
40
40
40
40
40
40
40
40
40
40
40
40
40
40
40
40
40
40
40
40
40
40
40
40
40
40
40
40
40
40
40
40
40
40
40
40
40
40
40
40
40
40
40
40
40
40
40
40
40
40
40
40
40
40
40
40
40
40
40
40
40
40
40
40
40
40
40
40
40
40
40
40
40
40
40
40
40
40
40
40
40
40
40
40
40
40
40
40
40
40
40
40
40
40
40
40
40
40
40
40
40
40
40
40
40
40
40
40
40
40
40
40
40
40
40
40
40
40
40
40
40
40
40
40
40
40
40
40
40
40
40
40
40
40
40
40
40
40
40
40
40
40
40
40
40
40
40
40
40
40
40
40
40
40
40
40
40
40
40
40
40
40
40
40
40
40
40
40
40
40
40
40
40
40
40
40
40
40
40
40
40
40
40
40
40
40
40
40
40
40
40
40
40
40
40
40
40
40
40
40
40
40
40
40
40
40
40
40
40
40
40
40
40
40
40
40
40
40
40
40
40
40
40
40
40
40
40
40
40

[truncated: 1 more sheets: Panel F]
