# Supplementary material for: Serial ‘deep-sampling’ PCR of fragmented DNA reveals the wide range of Trypanosoma cruzi burden among chronically infected human, macaque, and canine hosts, and allows accurate monitoring of parasite load following treatment
Source: eLife. 2025 Apr 15;14:RP104547. doi: 10.7554/eLife.104547 (PMC11999692; doi:10.7554/eLife.104547)
Supplement: Figure 4—figure supplement 1—source data 1. [file elife-104547-fig4-figsupp1-data1.xlsx]

## Sheet: Covaris
reactions for which a Ct value is not obtained are set at "40"
300	500	1000	Unfragmented
33.58	33.6	40	37.27
38.27	38.6	40	33.83
36.26	37.77	37.79	34.18
38.44	37.74	40	38.33
38.33	39.11	40	38.25
38.21	37.03	35.16	37.72
37.04	38.65	36.56	36.01
40	36.45	38.07	38.96
36.6	36.93	36.65	34.93
38.45	37.24	37.17	32.4
37.24	40	39.31	37.74
37.95	38.29	35.89	35.64
37.01	40	37.02	31.85
40	37.23	37.11	36.03
35.89	37.39	37.77	35.7
37.68	40	37.05	33.54
40	38.4	36.45	38.62
38.6	37.7	37.61	33.66
40	38.24	36.9	34.87
36.71	36.27	40	38.85
40	38.63	36.17	40
38.2	40	37.3	40
38.4	37.34	36.53	40
37.04	38.64	37.95	40
40	35.83	38.79	40
36.81	35.74	36.56	40
37.73	37.58	36.14	40
36.85	38.44	40	40
40	35.58	39.88	40
38.85	38.23	37.16	40
37.18	38.57	37.28	40
36.01	36.48	38.86	40
37.2	38.2	36.15	40
39.34	36.53	37.28	40
38.58	37.12	40	40
37.53	36.32	37.73	40
40	37.31	37.08	40
36.78	36.17	40	40
40	36.23	36.99	40
38.24	36.5	35.69	40
37.06	36.32	36.6	40
38.66	40	36.12	40
36.98	40	37.59	40
38.81	36.51	37.12	40
39.42	36.69	34.71	40
37.27	37.31	40	40
37.75	37.53	35.3	40
35.25	36.34	37.17	40
37.32	37.44	37.16	40
37.1	37.66	40	40
36.41	40	37.53	40
38.35	36.68	39.03	40
36.73	36.58	36.38	40
37.03	37.98	37.69	40
40	37.67	37.74	40
35.98	37.24	37.42	40
40	38.16	35.24	40
37.19	37.7	36.98	40
37.36	35.58	38.58	40
40	37.51	40	40
36.78	37.12	37.57	40
37.52	37.16	38.91	40
37.28	38.19	37.66	40
40	38.72	36.58	40
37.56	38.26	36.72	40
39.45	40	40	40
38.47	36.27	37.67	40
38.27	36.74	36.6	40
40	38.78	38.4	40
38.76	35.95	36.4	40
38	38.87	36.85	40
38.81	38.27	37.31	40
38.88	37.89	35.59	40
38.09	40	38.61	40
37.28	40	40	40
35.67	37.5	36.36	40
36.89	36.57	36.31	40
38.29	37.39	37.4	40
40	40	36.51
37	37	38.43
36.34		36.26

## Sheet: Cuphorn v. Covaris
reactions for which a Ct value is not obtained are set at "40"
not fragmented			Covaris			Cuphorn
-4	-5	-6	-4	-5	-6	-4	-5	-6
35.11	37.27	36.62	34.5	33.58	40	33.8	37.59	37.13
32.61	33.83	38.49	33.57	38.27	40	33.16	37.48	36.28
32.97	34.18	39.18	34.07	36.26	40	33.42	36.12	40
34.86	38.33	40	34.51	38.44	40	33.56	35.68	40
38.83	38.25	40	34.1	38.33	40	33.11	36.75	40
36.41	37.72	40	34.39	38.21	40	33.45	36.6	40
35.28	36.01	40	33.99	37.04	40	33.18	38.25	40
35.43	38.96	40	33.89	40	40	33.11	36.56	40
40	34.93	40	34.8	36.6	40	33.88	37	40
38.59	32.4	40	34.12	38.45	38.74	33.17	36.25	39.32
38.04	37.74	40	34.59	37.24	40	34.12	35.26	40
37.13	35.64	40	34.28	37.95	40	33.07	35.92	40
37.59	31.85	40	34.59	37.01	39.37	33.22	39.66	40
32.43	36.03	40	34.9	40	39.25	33.79	36.39	40
38.8	35.7	40	34.16	35.89	40	33.36	39.19	40
35.65	33.54	40	33.53	37.68	40	33.58	40	40
35.31	38.62	40	34.55	40	40	33.5	36.41	36.9
35.24	33.66	40	34.03	38.6	40	34.34	36.66	38.15
32.67	34.87	40	34.2	40	40	33.03	35.99	40
34.5	38.85	40	33.91	36.71	38.2	33.22	37.38	40
33.39	40	40	33.5	40	40	33.38	35.72	40
33.44	40	40	33.2	38.2	40	33.52	35.99	40
34.01	40	40	34.12	38.4	40	33.34	38.24	40
35.45	40	40	34.08	37.04	38.27	33.59	38.51	40
34.57	40	40	34.11	40	40	33.04	37.39	40
31.29	40	40	33.51	36.81	38.15	33.84	38.47	37.07
36.07	40	40	33.91	37.73	40	33.92	37.35	40
34.69	40	40	33.41	36.85	40	33.32	37.14	40
35.67	40	40	33.44	40	37.49	33.03	36.69	39.3
33.23	40	40	33.5	38.85	40	33.73	36.17	38.04
37	40	40	34.03	37.18	40	33.48	37.32	38.7
32.82	40	40	34.56	36.01	40	33.1	36.16	40
32.32	40	40	34.05	37.2	40	33.59	36.24	40
35.49	40	40	33.88	39.34	40	33.38	36.65	40
36.98	40	40	34.06	38.58	39.37	32.68	36.69	40
35.18	40	40	33.63	37.53	39.81	33.82	36.63	40
34.55	40	40	33.5	40	37.49	33.92	38.45	40
34.19	40	40	33.56	36.78	38.47	33.43	35.63	40
37.81	40	40	34.02	40	40	33.21	35.8	38.13
33.52	40	40	34.32	38.24	38.12	33.22	36.58	38.21
40	40	40	33.57	37.06	40	33.59	35.87	37.83
40	40	40	34.16	38.66	40	33.24	36.64	40
34.14	40	40	33.74	36.98	40	33.63	36.07	40
38.4	40	40	33.82	38.81	40	33.24	36.17	40
38.48	40	40	34.04	39.42	38.58	33.66	40	40
40	40	40	34	37.27	40	34.03	36.3	40
37.77	40	40	33.59	37.75	40	33.45	36.52	40
33.49	40	40	34.08	35.25	40	33.65	40	38.59
35.46	40	40	34.42	37.32	40	33.98	37.2	40
33.76	40	40	33.76	37.1	40	33.97	38.67	40
33.8	40	40	34.04	36.41	40	34.12	38.49	40
34.27	40	40	34.07	38.35	37.03	33.75	35.39	40
33.88	40	40	34.19	36.73	40	33.58	35.45	40
33.24	40	40	33.31	37.03	40	33.52	36.69	40
31.99	40	40	34.29	40	40	33.33	38.3	40
34.27	40	40	34.05	35.98	40	33.36	36.19	40
32.13	40	40	33.89	40	38.24	33.21	37.42	37.32
33.72	40	40	33.59	37.19	40	33.43	35.89	38.11
36.84	40	40	34.32	37.36	38.18	33.21	35.6	40
35.63	40	40	33.55	40	40	33.46	36.43	40
33.96	40	40	34.19	36.78	40	32.87	38.94	40
34.16	40	40	33.38	37.52	40	33.26	34.67	36.43
32.16	40	40	33.79	37.28	40	33.15	36.04	40
40	40	40	34.3	40	40	33.61	38.12	40
40	40	40	34.33	37.56	38.46	33.51	37.24	40
34.64	40	40	33.56	39.45	40	33.8	38.01	40
39.01	40	40	34.13	38.47	38.29	33.14	36.68	40
40	40	40	33.94	38.27	40	33.43	37.51	37.64
34.06	40	40	34.12	40	40	33.21	37.22	37.26
33.06	40	40	33.51	38.76	38.58	33.28	38.25	40
34.5	40	40	34.05	38	37.98	33.11	38.84	40
36.13	40	40	34.68	38.81	40	34.25	37.95	40
33.12	40	40	34.67	38.88	36.52		36.64	40
32.97	40	40	34.12	38.09	37.3			40
40	40	40	34.32	37.28	38.81			40
35.64	40	40	33.86	35.67	40			40
32.37	40	40	34.95	36.89	40			37.58
	40	40		38.29	36.8			36.76
		40		40	40			40
		40		37	40			40
				36.34	40			40
					40			40
					40			37.14
					40			40
					40			39.31
					40			39.26
					40
					38.4
					40
					40
