# Supplementary material for: Serial ‘deep-sampling’ PCR of fragmented DNA reveals the wide range of Trypanosoma cruzi burden among chronically infected human, macaque, and canine hosts, and allows accurate monitoring of parasite load following treatment
Source: eLife. 2025 Apr 15;14:RP104547. doi: 10.7554/eLife.104547 (PMC11999692; doi:10.7554/eLife.104547)
Supplement: Figure 4—figure supplement 2—source data 1. [file elife-104547-fig4-figsupp2-data1.xlsx]

## Sheet: P15
reactions for which a Ct value is not obtained are set at "40"
not fragmented				fragmented
October	November	May		October	November	May
28.38	35.11	28.93		29.59	30.17	28.68
27.66	29.36	29.66		29.35	30.01	28.3
40	35.62	29.05		29.44	29.28	28.28
40	40	28.84		29.27	29.29	28.6
40	40	29.69		29.47	30	28.45
40	40	29.09		28.66	29.37	27.79
40	40	28.96		28.84	29.18	28.26
40	40	28.92		28.15	28.83	28.41
40	40	29.76		28.8	29.33	29.51
40	40	29.13		29.02	29.63	28.59

## Sheet: P16
reactions for which a Ct value is not obtained are set at "40"
not fragmented				fragmented
October	November	May		October	November	May
26.48	25.27	31.35		28.56	27.8	33.64
28.31	26.47	39.43		28.48	27.9	33.31
28.09	27.14	32.03		28.69	28.19	32.77
27.61	40	31.87		28.07	27.4	34.23
27.94	40	32.19		28.64	28.07	34.16
27.22	40	40		28.37	27.68	31.9
28.09	40	40		28.24	27.24	31.6
27	40	40		27.68	26.48	31.71
26.86	40	40		28.28	29.01	32.12
26.93	40	40		28.19	27.11	32.4

## Sheet: P17
reactions for which a Ct value is not obtained are set at "40"
not fragmented				fragmented
October	November	May		October	November	May
25.11	32.36	26.83		25.8	25.88	26.24
25.06	35.27	27.32		25.45	27.75	26.38
25.07	40	27.11		25.57	26.65	26.41
24.77	40	27.08		25.35	25.65	26.25
25.79	40	27.3		25.87	25.95	26.34
24.58	40	27.3		25.47	26.24	27.05
25.08	40	27.12		25.66	25.86	26.91
28.51	40	27.98		25.2	25.09	25.83
25.08	40	27.3		25.8	26.96	26.69
40	40	27.24		26.02	26.09	26.49
