# Supplementary material for: Serial ‘deep-sampling’ PCR of fragmented DNA reveals the wide range of Trypanosoma cruzi burden among chronically infected human, macaque, and canine hosts, and allows accurate monitoring of parasite load following treatment
Source: eLife. 2025 Apr 15;14:RP104547. doi: 10.7554/eLife.104547 (PMC11999692; doi:10.7554/eLife.104547)
Supplement: Figure 4—source data 1. [file elife-104547-fig4-data1.xlsx]

## Sheet: Not fragmented
reactions for which a Ct value is not obtained are set at "40"
-3	-4	-5	-6
29.21	33.02	34.11	33.33
30.08	36.13	38.71	37.78
30.14	39.29	39.34	32.15
29.56	37.33	35.02	36.57
30.45	32.88	35.33	37.98
29.4	32.12	34.96	32.94
31.34	32.49	34.73	34.02
30.1	35.93	34.7	40
30.03	31.53	38.02	40
29.51	34.62	36.02	40
30.31	34.36	35.22	40
29.67	31.67	37.63	40
30.07	35.37	36.24	40
30.3	31.34	33.36	40
30.56	37.52	35.25	40
30.57	33.26	33.03	40
30.23	32.59	34.32	40
29.84	34.93	40	40
30.06	37.22	40	40
29.42	35.77	40	40
30.41	35.74	40	40
29.01	35.81	40	40
30.02	31.47	40	40
29.13	39.18	40	40
31.88	31.99	40	40
29.62	30.76	40	40
30.87	34.06	40	40
30.45	33.59	40	40
29.21	31.77	40	40
30.05	32.66	40	40
30.87	35.74	40	40
29.81	33.3	40	40
29.46	31.9	40	40
29.6	32.56	40	40
30.29	31.22	40	40
32.63	32.12	40	40
30.75	31.21	40	40
30.22	31.78	40	40
30.14	33.19	40	40
33.7	36.28	40	40
30.78	35.61	40	40
30.34	36.83	40	40
32.01	37.36	40	40
29.01	35.87	40	40
29.7	32.34	40	40
30.58	34.76	40	40
29.58	33.73	40	40
29.4	32.84	40	40
30.16	31.96	40	40
29.18	32.69	40	40
30.33	35.01	40	40
29.92	35.05	40	40
29.17	32.7	40	40
30.82	34.54	40	40
29.57	36.44	40	40
29.89	35.2	40	40
29.52	31.99	40	40
29.53	33.37	40	40
29.4	35.2	40	40
29.89	33.72	40	40
29.77	35.52	40	40
29.72	32.07	40	40
29.21	31.98	40	40
30.12	36.84	40	40
29.78	35.62	40	40
30.41	31.6	40	40
29.41	39.24	40	40
30.02	32.03	40	40
29.2	34.37	40	40
30.54	32.83	40	40
30.44	36.23	40	40
30.22	38.85	40	40
30.88	40	40	40
30.29	40	40	40
30.57	40	40	40
29.09	40	40	40
30.55	40	40	40
30.28	40	40	40
30.37	40	40	40
30.05	40	40	40
30.03	40	40	40
31.16	40	40	40
30.31	40	40	40
29.67	40	40	40
30.56	40	40	40
30.22	40	40	40
30.46	40	40	40
37.21	40	40	40
			40
			40
			40
			40
			40
			40
			40
			40

## Sheet: Fragmented
reactions for which a Ct value is not obtained are set at "40"
-4	-4 non	-5	-5 non	-6	-6 non
33.8	35.11	37.59	37.27	37.13	36.62
33.16	32.61	37.48	33.83	36.28	38.49
33.42	32.97	36.12	34.18	40	39.18
33.56	34.86	35.68	38.33	40	40
33.11	38.83	36.75	38.25	40	40
33.45	36.41	36.6	37.72	40	40
33.18	35.28	38.25	36.01	40	40
33.11	35.43	36.56	38.96	40	40
33.88	40	37	34.93	40	40
33.17	38.59	36.25	32.4	39.32	40
34.12	38.04	35.26	37.74	40	40
33.07	37.13	35.92	35.64	40	40
33.22	37.59	39.66	31.85	40	40
33.79	32.43	36.39	36.03	40	40
33.36	38.8	39.19	35.7	40	40
33.58	35.65	40	33.54	40	40
33.5	35.31	36.41	38.62	36.9	40
34.34	35.24	36.66	33.66	38.15	40
33.03	32.67	35.99	34.87	40	40
33.22	34.5	37.38	38.85	40	40
33.38	33.39	35.72	40	40	40
33.52	33.44	35.99	40	40	40
33.34	34.01	38.24	40	40	40
33.59	35.45	38.51	40	40	40
33.04	34.57	37.39	40	40	40
33.84	31.29	38.47	40	37.07	40
33.92	36.07	37.35	40	40	40
33.32	34.69	37.14	40	40	40
33.03	35.67	36.69	40	39.3	40
33.73	33.23	36.17	40	38.04	40
33.48	37	37.32	40	38.7	40
33.1	32.82	36.16	40	40	40
33.59	32.32	36.24	40	40	40
33.38	35.49	36.65	40	40	40
32.68	36.98	36.69	40	40	40
33.82	35.18	36.63	40	40	40
33.92	34.55	38.45	40	40	40
33.43	34.19	35.63	40	40	40
33.21	37.81	35.8	40	38.13	40
33.22	33.52	36.58	40	38.21	40
33.59	40	35.87	40	37.83	40
33.24	40	36.64	40	40	40
33.63	34.14	36.07	40	40	40
33.24	38.4	36.17	40	40	40
33.66	38.48	40	40	40	40
34.03	40	36.3	40	40	40
33.45	37.77	36.52	40	40	40
33.65	33.49	40	40	38.59	40
33.98	35.46	37.2	40	40	40
33.97	33.76	38.67	40	40	40
34.12	33.8	38.49	40	40	40
33.75	34.27	35.39	40	40	40
33.58	33.88	35.45	40	40	40
33.52	33.24	36.69	40	40	40
33.33	31.99	38.3	40	40	40
33.36	34.27	36.19	40	40	40
33.21	32.13	37.42	40	37.32	40
33.43	33.72	35.89	40	38.11	40
33.21	36.84	35.6	40	40	40
33.46	35.63	36.43	40	40	40
32.87	33.96	38.94	40	40	40
33.26	34.16	34.67	40	36.43	40
33.15	32.16	36.04	40	40	40
33.61	40	38.12	40	40	40
33.51	40	37.24	40	40	40
33.8	34.64	38.01	40	40	40
33.14	39.01	36.68	40	40	40
33.43	40	37.51	40	37.64	40
33.21	34.06	37.22	40	37.26	40
33.28	33.06	38.25	40	40	40
33.11	34.5	38.84	40	40	40
34.25	36.13	37.95	40	40	40
	33.12	36.64	40	40	40
	32.97		40	40	40
	40		40	40	40
	35.64		40	40	40
	32.37		40	37.58	40
			40	36.76	40
				40	40
				40	40
				40
				40
				37.14
				40
				39.31
				39.26

## Sheet: % positive rxns
T. cruzi equivalents	not fragmented	fragmented
0.001	100
0.0001	81	100
1e-05	19	95
1e-06	7	26
