# Supplementary material for: Serial ‘deep-sampling’ PCR of fragmented DNA reveals the wide range of Trypanosoma cruzi burden among chronically infected human, macaque, and canine hosts, and allows accurate monitoring of parasite load following treatment
Source: eLife. 2025 Apr 15;14:RP104547. doi: 10.7554/eLife.104547 (PMC11999692; doi:10.7554/eLife.104547)
Supplement: Figure 4—source data 2. [file elife-104547-fig4-data2.xlsx]

## Sheet: P2
reactions for which a Ct value is not obtained are set at "40"
N=178	N=178	N=240
40	40	40
40	40	40
40	40	40
40	40	40
40	40	40
40	40	40
40	40	40
40	40	40
40	40	40
40	40	40
40	40	40
40	40	40
40	40	40
40	40	40
40	40	40
40	40	40
40	40	40
40	40	40
40	40	40
40	40	40
40	40	40
40	40	40
40	40	40
40	40	40
40	40	40
40	40	40
40	40	40
40	40	40
40	40	40
40	40	40
40	40	40
40	40	40
40	40	40
40	40	40
40	40	40
40	40	40
40	40	40
40	40	40
40	40	40
40	40	40
40	40	40
40	40	40
40	40	40
40	40	40
40	40	40
40	40	40
40	40	40
40	40	40
40	40	40
40	40	40
40	40	40
40	40	40
40	40	40
40	40	40
40	40	40
40	40	40
40	40	40
40	40	40
40	40	40
40	40	40
40	40	40
40	40	40
40	40	40
40	40	40
40	40	40
40	40	40
40	40	40
40	40	40
40	40	40
40	40	40
40	40	40
40	40	40
40	40	40
40	40	40
40	40	40
40	40	40
40	40	40
40	40	40
40	40	40
40	40	40
40	40	40
40	40	40
40	40	40
40	40	40
40	40	40
40	40	40
40	40	40
40	40	40
40	40	40
40	40	40
40	40	40
40	40	40
40	40	40
40	40	40
40	40	40
40	40	40
40	40	40
40	40	40
40	40	40
40	40	40
40	40	40
40	40	40
40	40	40
40	40	40
40	40	40
40	40	40
40	40	40
40	40	40
40	40	40
40	40	40
40	40	40
40	40	40
40	40	40
40	40	40
40	40	40
40	40	40
40	40	40
40	40	40
40	40	40
40	40	40
40	40	40
40	40	40
40	40	40
40	40	40
40	40	40
40	40	40
40	40	40
40	40	40
40	40	40
40	40	40
40	40	40
40	40	40
40	40	40
40	40	40
40	40	40
40	40	40
40	40	40
40	40	40
40	40	40
40	40	40
40	40	40
40	40	40
40	40	40
40	40	40
40	40	40
40	40	40
40	40	40
40	40	40
40	40	40
40	40	40
40	40	40
40	40	40
40	40	40
40	40	40
40	40	40
40	40	40
40	40	40
40	40	40
40	40	40
40	40	40
40	40	40
40	40	40
40	40	40
40	40	40
40	40	40
40	40	40
40	40	40
40	40	40
40	40	40
40	40	40
40	40	40
40	40	40
40	40	40
40	40	40
40	40	40
40	40	40
40	40	40
40	40	40
		40
		40
		40
		40
		40
		40
		40
		40
		40
		40
		40
		40
		40
		40
		40
		40
		40
		40
		40
		40
		40
		40
		40
		40
		40
		40
		40
		40
		40
		40
		40
		40
		40
		40
		40
		40
		40
		40
		40
		40
		40
		40
		40
		40
		40
		40
		40
		40
		40
		40
		40
		40
		40
		40
		40
		40
		40
		40
		40
		40
		40
		40

## Sheet: P3
reactions for which a Ct value is not obtained are set at "40"
N=199	N=199	N=5
40	40	40
40	40	37.61
40	40	37.68
40	40	38.69
40	40	36.09
33.92	34.44
32.34	35.3
31.39	30.59
31.54	35.61
31.5	32.65
36.98	35.05
35.83	31.98
34.38	33.44
35.55	31.63
30.95	31.68
30.85	36.14
31.39	37.88
32.32	33.18
31.84	31.76
33.31	32.45
30.69	33.17
36.17	33.92
30.91	35.27
33.27	32.01
32.19	33.27
31.46	35.37
40	32.27
40	40
40	40
40	40
40	40
40	40
40	40
40	40
40	40
40	40
40	40
40	40
40	40
40	40
40	40
40	40
40	40
40	40
40	40
40	40
40	40
40	40
40	40
40	40
40	40
40	40
40	40
40	40
40	40
40	40
40	40
40	40
40	40
40	40
40	40
40	40
40	40
40	40
40	40
40	40
40	40
40	40
40	40
40	40
40	40
40	40
40	40
40	40
40	40
40	40
40	40
40	40
40	40
40	40
40	40
40	40
40	40
40	40
40	40
40	40
40	40
40	40
40	40
40	40
40	40
40	40
40	40
40	40
40	40
40	40
40	40
40	40
40	40
40	40
40	40
40	40
40	40
40	40
40	40
40	40
40	40
40	40
40	40
40	40
40	40
40	40
40	40
40	40
40	40
40	40
40	40
40	40
40	40
40	40
40	40
40	40
40	40
40	40
40	40
40	40
40	40
40	40
40	40
40	40
40	40
40	40
40	40
40	40
40	40
40	40
40	40
40	40
40	40
40	40
40	40
40	40
40	40
40	40
40	40
40	40
40	40
40	40
40	40
40	40
40	40
40	40
40	40
40	40
40	40
40	40
40	40
40	40
40	40
40	40
40	40
40	40
40	40
40	40
40	40
40	40
40	40
40	40
40	40
40	40
40	40
40	40
40	40
40	40
40	40
40	40
40	40
40	40
40	40
40	40
40	40
40	40
40	40
40	40
40	40
40	40
40	40
40	40
40	40
40	40
40	40
40	40
40	40
40	40
40	40
40	40
40	40
40	40
40	40

## Sheet: P7
reactions for which a Ct value is not obtained are set at "40"
N=5	N=5	N=5
40	40	35.25
34.79	40	35.35
36.17	40	36.39
40	40	35.37
40	32.45	35.51

## Sheet: P6
reactions for which a Ct value is not obtained are set at "40"
N=5	N=5	N=5
40	40	35.35
40	40	37
40	31.97	35.64
40	40	36.37
40	40	37.03

## Sheet: P9
reactions for which a Ct value is not obtained are set at "40"
N=5	N=5	N=5
40	34.37	35.09
40	40	34.9
40	40	33.98
31.38	40	35.07
40	38.17	33.69

## Sheet: P11
reactions for which a Ct value is not obtained are set at "40"
N=186	N=186	N=240
40	40	40
40	40	40
40	40	40
40	40	40
40	40	40
35.62	40	33.19
40	40	40
40	40	40
40	40	40
40	40	40
40	40	40
40	40	40
40	40	40
40	40	40
40	40	40
40	40	40
40	40	40
40	40	40
40	40	40
40	40	40
40	40	40
40	40	40
40	40	40
40	40	40
40	40	40
40	40	40
40	40	40
40	40	40
40	40	40
40	40	40
40	40	40
40	40	40
40	40	40
40	40	40
40	40	40
40	40	40
40	40	40
40	40	40
40	40	40
40	40	40
40	40	40
40	40	40
40	40	40
40	40	40
40	40	40
40	40	40
40	40	40
40	40	40
40	40	40
40	40	40
40	40	40
40	40	40
40	40	40
40	40	40
40	40	40
40	40	40
40	40	40
40	40	40
40	40	40
40	40	40
40	40	40
40	40	40
40	40	40
40	40	40
40	40	40
40	40	40
40	40	40
40	40	40
40	40	40
40	40	40
40	40	40
40	40	40
40	40	40
40	40	40
40	40	40
40	40	40
40	40	40
40	40	40
40	40	40
40	40	40
40	40	40
40	40	40
40	40	40
40	40	40
40	40	40
40	40	40
40	40	40
40	40	40
40	40	40
40	40	40
40	40	40
40	40	40
40	40	40
40	40	40
40	40	40
40	40	40
40	40	40
40	40	40
40	40	40
40	40	40
40	40	40
40	40	40
40	40	40
40	40	40
40	40	40
40	40	40
40	40	40
40	40	40
40	40	40
40	40	40
40	40	40
40	40	40
40	40	40
40	40	40
40	40	40
40	40	40
40	40	40
40	40	40
40	40	40
40	40	40
40	40	40
40	40	40
40	40	40
40	40	40
40	40	40
40	40	40
40	40	40
40	40	40
40	40	40
40	40	40
40	40	40
40	40	40
40	40	40
40	40	40
40	40	40
40	40	40
40	40	40
40	40	40
40	40	40
40	40	40
40	40	40
40	40	40
40	40	40
40	40	40
40	40	40
40	40	40
40	40	40
40	40	40
40	40	40
40	40	40
40	40	40
40	40	40
40	40	40
40	40	40
40	40	40
40	40	40
40	40	40
40	40	40
40	40	40
40	40	40
40	40	40
40	40	40
40	40	40
40	40	40
40	40	40
40	40	40
40	40	40
40	40	40
40	40	40
40	40	40
40	40	40
40	40	40
40	40	40
40	40	40
40	40	40
40	40	40
40	40	40
40	40	40
40	40	40
40	40	40
40	40	40
40	40	40
40	40	40
40	40	40
40	40	40
40	40	40
		40
		40
		40
		40
		40
		40
		40
		40
		40
		40
		40
		40
		40
		40
		40
		40
		40
		40
		40
		40
		40
		40
		40
		40
		40
		40
		40
		40
		40
		40
		40
		40
		40
		40
		40
		40
		40
		40
		40
		40
		40
		40
		40
		40
		40
		40
		40
		40
		40
		40
		40
		40
		40
		40
