# Supplementary material for: Serial ‘deep-sampling’ PCR of fragmented DNA reveals the wide range of Trypanosoma cruzi burden among chronically infected human, macaque, and canine hosts, and allows accurate monitoring of parasite load following treatment
Source: eLife. 2025 Apr 15;14:RP104547. doi: 10.7554/eLife.104547 (PMC11999692; doi:10.7554/eLife.104547)
Supplement: Figure 5—source data 1. [file elife-104547-fig5-data1.xlsx]

## Sheet: P2
reactions for which a Ct value is not obtained are set at "40"
Time 2	Time 3	Time 4	Time 5	Time 6	Time 7	Time 8
36.17	40	36.52	40	40	37.03	36.01
36.24	40	37.52	40	40	40	40
35.53	40	35.48	40	40	40	36.66
37.3	40	35.53	40	40	40	40
36.97	40	35.07	40	40	40	34.6
37.7	40	34.94	40	40	40	35.77
34	40	37.81	40	40	40	35.64
35.92	40	35.51	40	40	40	36.29
36.36	40	34.93	40	40	40	38.12
35.05	40	34.83	40	40	40	35.24
35.02	40	36.07	40	40	40	36.16
40	40	34.45	40	40	40	36.93
38.16	40	38.56	40	40	40	36.39
37.12	40	40	40	40	40	36.06
40	40	36.11	40	40	40	34.93
35.61	40	37.57	40	40	40	37.19
35.53	40	37.28	40	40	40	37.08
35.62	40	34.99	40	40	40	36.22
35.76	40	37.43	40	40	40	40
37.03	40	36.17	40	40	40	37.51
37.02	40	34.74	40	40	40	35.07
37.98	40	40	40	40	40	34.83
40	40	35.91	40	40	40	35.17
37.02	40	35.11	40	40	40	38.17
40	40	35.88	40	40	40	40
36.85	40	40	40	40	40	36.36
40	40	34.35	40	40	40	35.13
36.74	40	40	40	40	40	36.43
40	40	34.94	40	40	40	34.95
36.33	40	40	40	40	40	40
40	40	36.03	40	40	40	34.67
36.21	40	40	40	40	40	33.83
36.06	40	37.42	40	40	40	40
40	40	40	40	40	40	40
34.98	40	40	40	40	40	40
40	40	36.35	40	40	40	37.45
37.68	40	35.66	40	40	40	34.81
37.01	40	37.24	40	40	40	33.96
35.49	40	40	40	40	40	35.29
35.3	40	35.02	40	40	40	37.54
35.11	40	35.43	40	40	40	35.53
35.95	40	40	40	40	40	40
35.79	40	36.3	40	40	40	36.08
34.26	40	38.21	40	40	40	36.5
40	40	37.44	40	40	40	37.38
36.05	40	36.54	40	40	40	40
36.87	40	35.06	40	40	40	40
36.43	40	34.87	40	40	40	40
37.79	40	33.89	40	40	40	34.62
35.08	40	35.89	40	40	40	35.59
37.1	40	35.33	40	40	40	36.09
36.1	40	34.89	40	40	40	35.13
38.17	40	40	40	40	40	40
35.18	40	40	40	40	40	36.39
37.02	40	40	40	40	40	37.41
37.1	40	36.07	40	40	40	36.33
39.23	40	35.32	40	40	40	40
36.19	40	34.46	40	40	40	38.35
37.26	40	37.03	40	40	40	40
35.56	40	40	40	40	40	35.38
35.89	40	35.86	40	40	40	36.42
36.62	40	40	40	40	40	40
35.15	40	35.79	40	40	40	40
35.61	40	35.09	40	40	40	37.23
36.9	40	37.56	40	40	40	37.97
36.49	40	40	40	40	40	40
40	40	37.55	40	40	40	40
34.23	40	40	40	40	40	39.01
35.91	40	35.26	40	40	40	35.37
37.68	40	36.49	40	40	40	36.09
40	40	34.79	40	40	40	35.17
38.04	40	40	40	40	40	36.26
40	40	36.57	40	40	40	38.2
40	40	36.62	40	40	40	40
39.22	40	40	40	40	40	37
40	40	40	40	40	40	40
40	40	37.66	40	40	40	36.2
40	40	40	40	40	40	40
40	40	35.79	40	40	40	35.17
40	40	34.63	40	40	40	33.42
36.48	40	35.19	40	40	40	36.43
35.6	40	35.76	40	40	40	33.94
40	40	35.44	40	40	40	35.05
40	40	40	40	40	40	35.52
36.21	40	36.23	40	40	40	34.59
37.57	40	36.28	40	40	40	37.54
36.26	40	35.34	40	40	40	37.52
40	40	40	40	40	40	40
35.05	40	37.28	40	40	40	40
36.6	40	40	40	40	40	35.13
36.61	40	34.83	40	40	40	40
35.63	40	37.74	40	40	40	40
40	40	34.69	40	40	40	35.79
40	40	36.96	40	40	40	34.49
35.27	40	36.28	40	40	40	40
36.07	40	34.91	40	40	40	37.57
36.95	40	34.9	40	40	40	35.45
40	40	34.83	40	40	40	37.13
34.73	40	34.57	40	40	40	40
37.6	40	40	40	40	40	40
34.47	40	37.31	40	40	40	40
40	40	35.44	40	40	40	34.31
37.85	40	40	40	40	40	40
40	40	36.52	40	40	40	35.73
35.15	40	35.09	40	40	40	36.46
36.52	40	40	40	40	40	40
36.08	40	40	40	40	40	37.35
36.99	40	40	40	40	40	35.89
35.06	40	34.85	40	40	40	37.4
40	40	35.31	40	40	40	37.49
35.5	40	36.46	40	40	40	35.57
40	40	36.44	40	40	40	36.31
37.71	40	36.92	40	40	40	35.1
35.87	40	40	40	40	40	40
37.28	40	36.76	40	40	40	36.3
36.23	40	34.33	40	40	40	35.51
37.71	40	36.38	40	40	40	34.2
35.62	40	37.4	40	40	40	40
35.32	40	37.09	40	40	40	40
37.52	40	40	40	40	40	40
36.97	40	40	40	40	40	40
40	40	38.42	40	40	40	40
35.61	40	34.37	40	40	40	36.62
37.12	40	35.67	40	40	40	37.29
36.73	40	40	40	40	40	34.74
36.18	40	40	40	40	40	40
36.1	40	34.67	40	40	40	40
37.22	40	34.32	40	40	40	37.07
34.83	40	37.36	40	40	40	35.5
39.02	40	40	40	40	40	36.88
35.41	40	35.17	40	40	40	35.94
39.37	40	40	40	40	40	40
37.09	40	36.09	40	40	40	35.72
36.03	40	36	40	40	40	38.49
35.17	40	40	40	40	40	37.26
38.05	40	36.79	40	40	40	38.11
40	40	36.78	40	40	40	36.69
40	40	37.06	40	40	40	40
36.15	40	34.25	40	40	40	35.25
35.53	40	34.98	40	40	40	36.55
36.27	40	36.71	40	40	40	40
35.6	40	36.66	40	40	40	40
36.16	40	36.94	40	40	40	40
35.04	40	36.88	40	40	40	40
36.07	40	35.67	40	40	40	36.23
36.93	40	36.29	40	40	40	36.39
36.17	40	36.85	40	40	40	40
40	40	34.92	40	40	40	37.45
40	40	36.48	40	40	40	37.39
36.24	40	34.85	40	40	40	33.84
34.2	40	37.12	40	40	40	40
36.11	40	36.29	40	40	40	40
35.83	40	37.01	40	40	40	40
40	40	38.12	40	40	40	37.56
36.24	40	36.21	40	40	40	40
37.2	40	35.8	40	40	40	35.83
40	40	36.81	40	40	40	36.13
35.14	40	35.42	40	40	40	35.19
37.12	40	35.96	40	40	40	40
40	40	40	40	40	40	40
40	40	35.21	40	40	40	40
34.66	40	38.53	40	40	40	40
36.92	40	34.51	40	40	40	40
36.27	40	35.39	40	40	40	40
36.35	40	40	40	40	40	34.12
36.48	40	40	40	40	40	34.14
35.4	40	40	40	40	40	33.81
36.3	40	40	40	40	40	35.3
36.19	40	34.95	40	40	40	35.31
40	40	38.77	40	40	40	36.27
39.13	40	35.71	40	40	40	35.6
36	40	36.46	40	40	40	40
40	40	38.64	40	40	40	40
40	40	40	40	40	40	35.32
36.63	40	35.54	40	40	40	40
36.45	40	35.41	40	40	40	40
37.04	40	34.26	40	40	40	34.79
40	40	34.42	40	40	40	36.46
40	40	34.65	40	40	40	35.96
40	40	35.78	40	40	40	38.34
36.66	40	36.13	40	40	40	34.96
40	40	38.1	40	40	40	40
35	40	40	40	40	40	40
35.03	40	38.6	40	40	40	37.88
36.1	40	33.97	40	40	40	35.2
35.25	40	37.42	40	40	40	37.33
37.38	40	35.53	40	40	40	34.47
40	40	40	40	40	40	36.74
36.99	40	40	40	40	40	33.47
35.21	40	40	40	40	40	34.65
35.79	40	40	40	40	40	35.77
35.81	40	40	40	40	40	35.9
35.13	40	40	40	40	40	36.2
40	40	40	40	40	40	33.91
38.1	40	40	40	40	40	33.79
35.18	40	40	40	40	40	33.98
37.24	40	40	40	40	40	33.77
40	40	40	40	40	40	34.24
35.3	40	40	40	40	40	34.23
40	40	40	40	40	40	34.69
36.45	40	40	40	40	40	40
35.85	40	40	40	40	40	40
36.07	40	40	40	40	40	34.65
40	40	40	40	40	40	35.21
35.04	40	40	40	40	40	36.41
36.9	40	40	40	40	40	35.5
37.24	40	40	40	40	40	38.06
35.27	40	40	40	40	40	34.77
40	40	40	40	40	40	35.67
36.97	40	40	40	40	40	33.78
36.07	40	40	40	40	40	35.55
35.53	40	40	40	40	40	34.85
36.54	40	40	40	40	40	34.37
38.04	40	40	40	40	40	40
34.86	40	40	40	40	40	33.54
35.05	40	40	40	40	40	35.26
35.29	40	40	40	40	40	33.74
36.41	40	40	40	40	40	35.37
40	40	40	40	40	40	35.27
34.22	40	40	40	40	40	33.79
34.52	40	40	40	40	40	36.03
36.6	40	40	40	40	40	40
37.68	40	40	40	40	40	35.4
40	40	40	40	40	40	40
35.16	40	40	40	40	40	34.44
40	40	40	40	40	40	35.58
36.85	40	40	40	40	40	34.49
40	40	40	40	40	40	36.23
37.15	40	40	40	40	40	33.99
34.59	40	40	40	40	40	40
35.57	40	40	40	40	40	34.78
33.91	40	40	40	40	40	36.28
34.86	40	40	40	40	40	33.41
34.57	40	40	40	40	40	40
40	40	40	40	40	40	35.45
37.29	40	40	40	40	40	35.25
36.46	40	40	40	40	40	34.43
36.77	40	40	40	40	40	40
34.13	40	40	40	40	40	33.3
35.23	40	40	40	40	40	35.67
34.16	40	40	40	40	40	33.43
35.28	40	40	40	40	40	34.42
36.42	40	40	40	40	40	34.03
34.19	40	40	40	40	40	35.27
40	40	40	40	40	40	35.82
35.37	40	40	40	40	40	35.89
34.97	40	40	40	40	40	40
40	40	40	40	40	40	35.7
35.28	40	40	40	40	40	40
36.15	40	40	40	40	40	40
35.78	40	40	40	40	40	34.89
35.94	40	40	40	40	40	36.05
37.26	40	40	40	40	40	40
34.73	40	40	40	40	40	34.58
37.21	40	40	40	40	40	34.91
40	40	40	40	40	40	37.18
35.2	40	40	40	40	40	35.05
37.71	40	40	40	40	40	35.97
35.57	40	40	40	40	40	33.74
35.34	40	40	40	40	40	35.86
34.52	40	40	40	40	40	33.34
34.89	40	40	40	40	40	35.23
35.1	40	40	40	40	40	33.82
40	40	40	40	40	40	35.38
35	40	40	40	40	40	34.57
34.77	40	40	40	40	40	34.27
35.95	40	40	40	40	40	35.66
35.63	40	40	40	40	40	37.67
40	40	40	40	40	40	34.89
40	40	40	40	40	40	40
34.76	40	40	40	40	40	33.86
36.1	40	40	40	40	40	36.63
40	40	40	40	40	40	33.89
40	40	40	40	40	40	37.39
34.18	40	40	40	40	40	37.19
34.96	40	40	40	40	40	40
34.85	40	40	40	40	40	33.29
36.39	40	40	40	40	40	35.77
36.29	40	40	40	40	40	34.53
34.62	40	40	40	40	40	34.65
35.46	40	40	40	40	40	34.43
37.22	40	40	40	40	40	38.37
35.18	40	40	40	40	40	35.36
40	40	40	40	40	40	37.46
35.07	40	40	40	40	40	34.14
38.01	40	40	40	40	40	40
36.82	40	40	40	40	40	35.11
35.62	40	40	40	40	40	36.49
35.7	40	40	40	40	40	35.06
35.69	40	40	40	40	40	36.35
34.4	40	40	40	40	40	40
37.88	40	40	40	40	40	35.75
36.71	40	40	40	40	40	35.26
40	40	40	40	40	40	35.72
35.22	40	40	40	40	40	36.06
40	40	40	40	40	40	34.16
40	40	40	40	40	40	33.75
35.48	40	40	40	40	40	36.16
35.27	40	40	40	40	40	34.76
36.81	40	40	40	40	40	34.45
36.91	40	40	40	40	40	36.08
40	40	40	40	40	40	36.47
35.97	40	40	40	40	40	34.33
34.56	40	40	40	40	40	35.08
40	40	40	40	40	40	35.33
35.28	40	40	40	40	40	35.75
37.05	40	40	40	40	40	34.17
35.48	40	40	40	40	40	34.25
36.73	40	40	40	40	40	34.74
35.25	40	40	40	40	40	38.36
34.89	40	40	40	40	40	34.8
35.26	40	40	40	40	40	36.12
34.49	40	40	40	40	40	34.87
40	40	40	40	40	40	37.3
40	40	40	40	40	40	34.55
35.6	40	40	40	40	40	35.16
39.04	40	40	40	40	40	36.36
36.89	40	40	40	40	40	38.2
36.04	40	40	40	40	40	36.01
40	40	40	40	40	40	37.1
35.91	40	40	40	40	40	34.47
35.86	40	40	40	40	40	36.49
40	40	40	40	40	40	33.91
40	40	40	40	40	40	36.38
35.24	40	40	40	40	40	34.09
40	40	40	40	40	40	33.52
35.49	40	40	40	40	40	35.23
40	40	40	40	40	40	40
35.13	40	40	40	40	40	35.15
35.21	40	40	40	40	40	34.84
37.85	40	40	40	40	40	33.65
35.08	40	40	40	40	40	35.36
36.84	40	40	40	40	40	35.54
36.71	40	40	40	40	40	38.11
37.16	40	40	40	40	40	40
36.17	40	40	40	40	40	37.37
35.03	40	40	40	40	40	35.15
35.04	40	40	40	40	40	33.49
35.71	40	40	40	40	40	36.87
37.19	40	40	40	40	40	40
35.68	40	40	40	40	40	40
36.15	40	40	40	40	40	35.32
35.78	40	40	40	40	40	35.5
34.62	40	40	40	40	40	36.46
40	40	40	40	40	40	35.49
40	40	40	40	40	40	34.43
36.48	40	40	40	40	40	40
40	40	40	40	40	40	35.3
36	40	40	40	40	40	33.7
37.07	40	40	40	40	40	33.41
35.97	40	40	40	40	40	36.02
37.01	40	40	40	40	40	36.12
40	40	40	40	40	40	33.77
34.82	40	40	40	40	40	33.63
36.84	40	40	40	40	40	33.81
35.31	40	40	40	40	40	35.87
40	40	40	40	40	40	34.24
35.13	40	40	40	40	40	35.26
34.59	40	40	40	40	40	33.26
36	40	40	40	40	40	35.23
36.9	40	40	40	40	40	34.24
40	40	40	40	40	40	40
36.34	40	40	40	40	40	33.56
37.04	40	40	40	40	40	34.12
37.04	40	40	40	40	40	34.09
36.95	40	40	40	40	40	37.06
36.77	40	40	40	40	40	33.52
34.86	40	40	40	40	40	37.02

## Sheet: P3
reactions for which a Ct value is not obtained are set at "40"
Time 2	Time 3	Time 4	Time 5	Time 6	Time 7	Time 8
40	40	40	34.81	34.57	40	34.12
40	40	40	35.22	34.42	40	35.44
40	40	40	40	33.81	40	36
40	40	40	40	35.23	40	35.71
40	40	40	40	35.67	40	40
40	40	40	40	35.72	40	40
40	40	40	37.61	33.92	40	36.11
40	40	40	32.93	36.17	40	36.92
36.48	40	40	35.42	32.95	40	40
40	40	40	35.36	34.76	40	36.11
36.51	40	40	36.91	31.28	40	40
40	40	40	36.61	36.48	40	40
40	40	40	40	33.91	40	34.99
40	40	40	35.84	34.96	40	36.74
40	40	40	33.22	35.18	40	35.03
40	40	40	33.89	35.67	40	40
40	40	40	40	35.42	40	40
40	40	40	36.87	35.8	40	36.97
40	40	40	33.41	35.18	40	36.14
40	40	40	40	32.07	40	36.96
40	40	40	37.5	33.17	40	33.91
40	40	40	34.11	31.96	40	34.72
40	40	40	35.4	40	40	40
40	40	40	40	34.45	40	34.72
40	40	40	40	35.2	40	40
40	40	40	40	35.08	40	35.12
40	40	40	32.22	40	40	35.11
34.85	40	40	33.01	35.11	40	40
40	40	40	35.27	40	40	36.44
36.01	40	40	36.18	35.69	40	40
40	40	40	32.14	34.66	40	37.04
40	40	40	40	40	40	40
35.52	40	40	40	33.99	40	35.66
40	40	40	40	34.7	40	34.82
40	40	40	34.24	34.72	40	35.28
40	40	40	35.46	36.17	40	37.19
40	40	40	40	34.49	40	34.17
40	40	40	32.29	35.14	40	40
40	40	40	40	35.55	40	40
40	40	40	36.35	33.12	40	40
40	40	40	36.48	32.94	40	35.26
40	40	40	38.32	37.64	40	40
40	40	40	40	32.69	40	33.69
35.38	40	40	33.83	33.43	40	40
40	40	40	34.59	33.37	40	35.47
40	40	40	40	31.9	40	36.55
40	40	40	35.91	32.03	40	40
40	40	40	40	40	40	40
40	40	40	32.44	36.44	40	34.93
40	40	40	33.52	37.56	40	40
40	40	40	40	40	40	39.46
35.58	40	40	35.25	35.58	40	35.88
40	40	40	35.38	40	40	35.79
40	40	40	40	40	40	34.9
40	40	40	32.06	35.15	40	35.06
40	40	40	36.56	34.62	40	36.24
40	40	40	32.26	37.26	40	36.28
40	40	40	33.59	40	40	34.38
40	40	40	40	36.15	40	35.66
40	40	40	35.2	36.09	40	37.74
40	40	40	32.73	37.59	40	40
40	40	40	36.91	40	40	36.27
40	40	40	32.69	32.08	40	35.72
40	40	40	40	35.09	40	34.58
40	40	40	31.83	36.36	40	35.82
40	40	40	35.44	35.71	40	40
40	40	40	37.19	34.67	40	40
40	40	40	40	34.46	40	40
40	40	40	33.53	35.43	40	40
40	40	40	40	35.75	40	40
34.58	40	40	40	36.34	40	35.15
40	40	40	37.23	35.22	40	34.66
40	40	40	34.48	36.32	40	34.05
40	40	40	33.91	34.51	40	36.67
40	40	40	34.82	37.32	40	34.7
40	40	40	40	40	40	36.27
40	40	40	33.9	38.57	40	35.08
40	40	40	37.44	40	40	39.22
40	40	40	40	36.61	40	35.55
40	40	40	40	36.76	40	35.28
40	40	40	40	36.22	40	34.1
40	40	40	40	34.45	40	35.56
40	40	40	35.78	36.52	40	36.79
40	40	40	40	35.56	40	36.52
40	40	40	33.58	34.02	40	35.02
40	40	40	40	35.34	40	36.1
40	40	40	39.37	34.55	40	35.64
40	40	40	40	38.1	40	35.18
40	40	40	35.27	33.85	40	35
40	40	40	34.12	40	40	38.67
40	40	40	33.92	36.28	40	35.66
40	40	40	35.36	36.34	40	37.28
40	40	40	40	38.75	40	36.05
40	40	40	33.73	37.96	40	35.83
40	40	40	35.51	38.04	40	35.41
40	40	40	37.72	37.52	40	35.72
40	40	40	33.25	34.62	40	35.27
40	40	40	35.65	34.23	40	35.14
40	40	40	34.98	33.42	40	40
40	40	40	40	36.39	40	36.52
40	40	40	40	34.71	40	34.94
40	40	40	34.95	34.58	40	35.46
40	40	40	40	40	40	40
40	40	40	36.18	37.13	40	35.23
40	40	40	32.34	40	40	39.39
40	40	40	32.41	36.47	40	40
40	40	40	34.02	34.35	40	40
40	40	40	34.1	36.38	40	34.16
40	40	40	35.45	32.93	40	35.37
40	40	40	36.21	40	40	40
34.8	40	40	34.36	36.14	40	40
40	40	40	40	35.36	40	40
40	40	40	34.2	40	40	37.52
40	40	40	36.65	35.15	40	40
40	40	40	34.57	34.32	40	36.73
40	40	40	38.01	40	40	40
34.79	40	40	40	33.66	40	33.85
40	40	40	36.52	35.58	40	40
40	40	40	40	33.45	40	40
40	40	40	40	35.02	40	34.26
40	40	40	40	40	40	35.04
40	40	40	40	40	40	36.14
40	40	40	40	34.38	40	34.44
38.78	40	40	37.41	35.74	40	40
40	40	40	40	35.39	40	34.31
40	40	40	40	36.16	40	37
40	40	40	40	36.68	40	40
40	40	40	36.12	40	40	36.02
40	40	40	36.13	34.22	40	40
40	40	40	36.57	34.62	40	35.48
40	40	40	40	36.02	40	34.37
40	40	40	37.38	40	40	36.59
35.76	40	40	40	33.79	40	37.02
40	40	40	37.23	36.85	40	35.93
40	40	40	38.08	34.73	40	36.44
40	40	40	36.42	40	40	40
40	40	40	36.62	34.61	40	37.15
40	40	40	33.19	35.59	40	40
40	40	40	31.37	35.5	40	34.18
36.11	40	40	40	37.27	40	36.26
40	40	40	35.26	36.52	40	35.42
40	40	40	40	40	40	40
40	40	40	35.41	36.26	40	35.16
37.05	40	40	40	34.67	40	40
40	40	40	35.78	35.26	40	36.62
40	40	40	35.05	34.81	40	36.17
40	40	40	31.12	34.05	40	34.97
40	40	40	36.55	35.83	40	37.04
40	40	40	38.33	34.38	40	35.01
40	40	40	35.75	37.21	40	36.32
40	40	40	36.06	33.56	40	40
40	40	40	33.32	31.52	40	35.63
40	40	40	35.15	35.54	40	40
40	40	40	40	32.3	40	34.57
40	40	40	36.89	33.13	40	37.14
40	40	40	36.68	35.75	40	33.87
40	40	40	38.15	37.26	40	36.76
40	40	40	32.66	35.4	40	37.02
40	40	40	35.1	37.23	40	40
40	40	40	40	40	40	40
40	40	40	32.09	40	40	40
40	40	40	40	40	40	39.53
40	40	40	33.8	37.44	40	40
40	40	40	36.06	40	40	37.07
40	40	40	35.42	36.81	40	40
40	40	40	35.16	35.69	40	40
40	40	40	35.49	34.05	40	40
40	40	40	36.17	34.33	40	40
40	40	40	40	35.82	40	35.29
35.34	40	40	33.34	40	40	40
40	40	40	32.06	40	40	34.32
40	40	40	35.34	31.84	40	34.35
40	40	40	36.18	36.77	40	33.96
40	40	40	34.91	40	40	35.15
40	40	40	36.06	40	40	38.31
40	40	40	35.59	40	40	40
40	40	40	35.71	40	40	36.64
40	40	40	36.42	40	40	35.69
40	40	40	40	35.57	40	35.95
40	40	40	33.57	40	40	36.26
40	40	40	36.15	33.93	40	34.23
40	40	40	40	35.43	40	35.7
40	40	40	36.59	40	40	35.34
40	40	40	40	40	40	37.08
40	40	40	34.33	33.16	40	35.32
40	40	40	40	35.03	40	37.14
35.05	40	40	32.81	36.1	40	34.69
40	40	40	35.51	40	40	40
40	40	40	34.38	34.09	40	40
40	40	40	35.55	35.75	40	40
34.37	40	40	35.8	35.92	40	40
40	40	40	36.78	35.09	40	40
35.15	40	40	33.8	34.47	40	40
40	40	40	34.45	35.05	40	40
40	40	40	33.74	34.35	40	40
40	40	40	34.54	34.94	40	40
40	40	40	35.47	33.03	40	40
40	40	40	36.66	34.45	40	40
36.21	40	40	36.95	34.4	40	40
40	40	40	35.53	33.8	40	40
40	40	40	34.81	33.77	40	40
40	40	40	38.18	34.07	40	40
40	40	40	35.09	33.71	40	40
40	40	40	34.56	34.08	40	40
40	40	40	34.29	34.61	40	40
33.95	40	40	34.32	35.43	40	40
40	40	40	34.57	36.27	40	40
40	40	40	35.56	34.98	40	40
40	40	40	34.7	33.57	40	40
33.43	40	40	34.77	35.95	40	40
40	40	40	34.61	34.91	40	40
40	40	40	35.85	34.75	40	40
40	40	40	35.1	34.58	40	40
35.26	40	40	40	34.41	40	40
40	40	40	37.08	33.22	40	40
40	40	40	35.45	34.68	40	40
40	40	40	36.07	34.86	40	40
40	40	40	35.07	34.15	40	40
35.12	40	40	34.3	34.01	40	40
40	40	40	35.37	35.28	40	40
40	40	40	35.49	35.27	40	40
40	40	40	35.28	36.56	40	40
40	40	40	35.29	34.04	40	40
40	40	40	36.34	35.22	40	40
40	40	40	35.57	34.29	40	40
40	40	40	34.05	36.52	40	40
40	40	40	37.12	33.31	40	40
40	40	40	34.89	40	40	40
40	40	40	35.25	35.87	40	40
40	40	40	35.24	36.07	40	40
40	40	40	34.76	34.21	40	40
40	40	40	34.69	36.39	40	40
40	40	40	34.24	34.42	40	40
40	40	40	35.33	34.88	40	40
34.81	40	40	34.26	34.04	40	40
40	40	40	34.34	36.17	40	38.3
40	40	40	34.49	33.8	40	40
40	40	40	34.93	40	40	40
34.11	40	40	35.33	35.43	40	40
40	40	40	40	34.09	40	40
40	40	40	34.14	33.34	40	40
40	40	40	34.73	35.41	40	40
40	40	40	33.77	36.61	40	40
40	40	40	35.65	34.66	40	40
40	40	40	35.13	34.42	40	40
40	40	40	40	35.23	40	40
40	40	40	34.18	34.11	40	40
40	40	40	34.53	34	40	40
34.55	40	40	34.52	34.06	40	40
40	40	40	36.2	34.02	40	40
40	40	40	34.24	33.22	40	40
40	40	40	36.23	35.2	40	40
36.14	40	40	34.73	34.46	40	40
34.48	40	40	34.81	34.16	40	40
40	40	40	35.16	36.01	40	40
40	40	40	35.01	33.82	40	40
40	40	40	34.03	33.97	40	40
40	40	40	35.7	34.65	40	40
36.11	40	40	35.03	34.3	40	40
39.58	40	40	34.59	36.31	40	40
40	40	40	34.89	33.48	40	40
34.64	40	40	35.92	35.8	40	40
40	40	40	34.13	33.49	40	40
40	40	40	35.31	34.15	40	40
35.82	40	40	34.18	34.15	40	40
40	40	40	35.98	34.37	40	40
40	40	40	34.68	40	40	40
40	40	40	34.49	34.76	40	40
40	40	40	40	34.18	40	40
40	40	40	38.25	36.47	40	40
40	40	40	35.26	33.26	40	40
40	40	40	37.22	35.88	40	40
40	40	40	36.72	33.48	40	40
40	40	40	35.14	36.89	40	40
40	40	40	36.66	36.04	40	40
40	40	40	35.13	40	40	40
40	40	40	35.5	34.98	40	40
40	40	40	33.83	35.61	40	40
40	40	40	35.43	33.55	40	40
40	40	40	35.04	35.96	40	40
40	40	40	34.94	34.91	40	40
40	40	40	36.38	38.73	40	40
40	40	40	34.34	34.42	40	40
40	40	40	33.98	36.35	40	40
40	40	40	36.93	34.99	40	40
35.03	40	40	34.58	34.81	40	40
40	40	40	36.17	33.34	40	40
40	40	40	34.9	33.44	40	40
40	40	40	35.08	33.35	40	40
40	40	40	34.83	33.24	40	40
40	40	40	34.89	33.95	40	40
40	40	40	35.46	34.29	40	40
40	40	40	35.3	33.17	40	40
40	40	40	35.3	34.26	40	40
40	40	40	34.61	33.26	40	40
40	40	40	35.16	33.41	40	40
40	40	40	34.19	34.14	40	40
40	40	40	35.17	34.29	40	40
40	40	40	38.48	34.07	40	40
40	40	40	36.13	34.44	40	37.92
34.35	40	40	35.92	33.96	40	40
40	40	40	34.79	34.32	40	40
40	40	40	34.25	33.62	40	40
40	40	40	34.95	35.58	40	40
40	40	40	35.09	35.17	40	40
40	40	40	34.19	33.23	40	40
40	40	40	34.91	33.86	40	40
40	40	40	34.44	36.15	40	40
40	40	40	34.84	34.04	40	40
40	40	40	35.14	34.02	40	40
40	40	40	34.85	34.98	40	40
40	40	40	35.35	33.58	40	40
40	40	40	34.29	32.74	40	40
40	40	40	35.42	35.01	40	40
40	40	40	35.45	34.37	40	40
40	40	40	35.39	35.73	40	40
40	40	40	35.21	34.13	40	40
40	40	40	35.14	35.14	40	40
40	40	40	34.81	33.9	40	40
40	40	40	34.64	35.3	40	40
40	40	40	34.36	33.54	40	40
40	40	40	35.2	35.76	40	40
40	40	40	33.86	34.69	40	40
35.34	40	40	34.51	34.4	40	40
40	40	40	35.76	34.72	40	40
40	40	40	34.35	35.5	40	40
40	40	40	35.33	33.66	40	40
40	40	40	34.66	37.9	40	40
40	40	40	34.07	33.7	40	40
40	40	40	35.82	35.94	40	40
40	40	40	33.39	34.06	40	40
40	40	40	35.68	34.29	40	40
34.91	40	40	34.5	33.4	40	39.27
34.86	40	40	33.45	34.83	40	40
40	40	40	36.45	34.35	40	40
35.34	40	40	34.86	33.18	40	40
40	40	40	36.03	34.29	40	40
40	40	40	34.51	33.75	40	40
40	40	40	35.55	34.3	40	40
40	40	40	34.74	35.87	40	40
40	40	40	35.91	33.23	40	40
40	40	40	35.01	34.38	40	40
40	40	40	35.63	34.08	40	40
40	40	40	34.49	33.15	40	40
40	40	40	36.16	33.93	40	40
40	40	40	34.16	34.24	40	40
40	40	40	34.44	33.75	40	40
40	40	40	33.9	34.29	40	40
40	40	40	37.11	34.06	40	40
40	40	40	35.4	36.47	40	40
40	40	40	34.45	33.64	40	40
40	40	40	33.76	34.13	40	40
34.27	40	40	34.45	34.45	40	40
40	40	40	34.6	33.44	40	40
40	40	40	35.1	33.33	40	40
40	40	40	35.88	34.23	40	40
40	40	40	35.66	36.26	40	40
40	40	40	34.67	34.45	40	40
40	40	40	35.48	34.37	40	40
40	40	40	35.06	33.15	40	40
40	40	40	35.45	34.35	40	40
40	40	40	34.96	33.98	40	40
40	40	40	33.98	33.98	40	40
40	40	40	34.98	34.5	40	40
34.72	40	40	36.39	34.04	40	40
40	40	40	35.33	33.9	40	40
40	40	40	35.91	34.34	40	40
35.15	40	40	37.45	34.15	40	40

## Sheet: P7
reactions for which a Ct value is not obtained are set at "40"
Time 2	Time 3	Time 4	Time 5	Time 6	Time 7	Time 8
34.59	34.04	33.36	34.47	35.73	40	40
35.27	33.12	33.37	35.75	35.46	40	40
34.93	34.1	33.93	35.49	40	40	40
34.42	33.66	33.98	36.8	40	40	40
35.92	33.72	33.58	35.67	40	40	40
34.48	32.75	33.87	36.81	40	40	40
34.53	33.05	33.86	34	36.12	40	40
34.82	33.22	33.45	35.09	40	40	40
34.81	33.57	33.34	36.38	40	40	40
34.65	34.14	33.7	40	37.09	40	40
33.83	32.9	33.15	35.83	40	40	40
35.49	33.52	34.31	37.55	40	40	40
34.22	33.44	40	35.93	36.29	40	40
34.51	35.12	40	35.67	34.25	40	40
33.6	33.01	40	40	35.76	40	40
36.64	33.17	40	37.45	35.12	40	40
35.46	33.26	33.66	35.03	40	40	40
35.08	33.21	35.09	36.06	40	40	40
35.12	33.53	33.58	34.86	40	40	40
35.59	33.44	33.74	35.34	40	40	40
34.79	33.19	33.84	35.61	35.17	40	40
34.79	33.23	34.13	37.21	40	40	40
34.97	33.35	33.96	34.74	37.43	40	40
34.85	33.09	33.86	35.08	36.01	40	40
34.53	33.41	34.67	35.55	40	40	40
34.72	33.64	35.86	36	37.2	40	40
35.01	33.42	34.45	35.2	40	40	40
34.5	33.04	40	34.47	40	40	40
34.77	33.38	33.78	35.07	40	40	40
34.19	33.22	36.02	40	40	40	40
34.3	33.24	34.1	35.38	36.03	40	40
34.32	33.01	34.43	35.25	36.69	40	40
35	32.94	34.26	40	40	40	40
36.12	33.46	33.53	40	35.93	40	40
34.73	33.19	34.29	35.02	40	40	40
33.89	33.28	34.98	35.88	40	40	40
34.27	34.11	40	34.96	36.01	40	40
35.1	33.13	40	35.75	37.4	40	40
34.64	33.23	40	34.11	36.14	40	40
34.1	32.85	40	37.3	37.33	40	40
34.97	33.19	34.93	40	40	40	40
37.2	33.87	34.5	37.94	40	40	40
34.17	33.21	34.5	40	40	40	40
33.89	33.74	33.61	35.18	40	40	40
36.2	33.33	34.32	34.92	40	40	40
34.87	33.1	34.56	34.91	36.01	40	40
36.34	34.04	33.79	35.63	36.73	40	40
40	33.07	35.65	36.74	40	40	40
34.56	33.43	33.82	35.15	38.93	40	40
37.49	33.92	34.01	37.82	34.76	40	40
34.51	33.21	34.02	35.29	37.28	40	40
34.2	33.48	34.59	40	40	40	40
35.37	33.42	33.65	34.72	36.76	40	40
40	33.45	40	34.96	36.12	40	40
36.93	32.67	33.65	40	35.77	40	40
34.45	33.11	33.85	36.67	40	40	40
35.1	33.41	33.33	38.8	40	40	40
35.42	33.43	33.26	36.62	40	40	40
34.24	33.47	34.01	40	40	40	40
35.5	33.23	33.22	40	40	40	40
34.33	33.6	32.39	34.67	38.15	40	40
35.14	33.33	34.24	37.1	40	40	40
33.9	32.48	33.44	34.98	40	40	40
35.31	34.02	33.21	35.73	40	40	40
35.41	33.63	32.9	40	40	40	40
34.46	32.9	34.05	40	40	40	40
35.13	32.96	32.92	35.81	40	40	40
34.67	33.79	35.31	34.77	40	40	40
33.84	32.45	33.31	38.61	40	40	40
34.58	33.66	33.82	35.48	40	40	40
34.9	33.26	34.44	34.79	40	40	40
34.14	33.19	33.41	36.76	40	40	40
34.21	33.16	36.11	40	35.33	40	40
35.05	33.79	35.49	36.82	34.36	40	40
35.27	33.67	34.85	40	38.32	40	40
34.29	34.54	35.82	35	35.7	40	40
35.42	34.38	34.77	36.01	37.21	40	40
33.09	32.62	40	38.33	37.75	40	40
38.32	32.36	35.21	35.04	36.47	40	40
34.73	33.49	37.66	37.36	40	40	40
40	33.2	35.36	34.49	40	40	40
36.34	33.01	40	40	38.91	40	40
34.59	34.09	33.97	36.24	40	40	40
34.58	33.51	35.41	40	36.33	40	40
34.67	33.31	34.35	36.33	36.54	40	40
35.26	34.24	34.26	36.43	37.02	40	40
35.13	33.55	34.42	34.77	37.94	40	40
35.04	33.73	40	35.77	34.81	40	40
34.59	33.35	33.56	40	36.29	40	40
34.35	33.19	34.37	35.45	37.33	40	40
34.76	33.67	34.54	37.2	40	40	40
34.08	33.97	34.32	35.14	35.9	40	40
34.48	34.34	35.22	34.9	40	40	40
35.38	33.96	35.75	40	40	40	40
34.62	33.76	33.42	35.3	35.64	40	40
35.07	33.69	33.39	36.42	40	40	40
36.28	33.66	34.19	34.83	40	40	40
35.19	33.59	35.57	37.12	40	40	40
34.34	33.03	33.11	35.66	37.12	40	40
37.47	33.97	34.03	38.25	37.01	40	40
34.43	33.65	35.27	37.07	40	40	40
34.43	33.7	33.94	37.25	40	40	40
35.74	33.4	34.09	36.52	36.96	40	40
36.31	35.29	33.58	36.86	40	40	40
38.31	33.91	34.64	36.93	40	40	40
37.27	32.98	35.48	35.2	40	40	40
35.84	33.06	40	35.59	36.47	40	40
35.32	33.22	40	35.66	40	40	40
34.57	34.04	34.27	36.71	34.95	40	40
34.2	40	34.02	37.05	40	40	40
34.05	33.55	33.89	35.29	40	40	40
35.62	33.05	34.01	36.43	37.22	40	40
34.58	33.44	34.34	39.46	40	40	40
35.33	33.57	33.65	35.52	40	40	40
35.13	33.41	34.23	34.53	40	40	40
36.51	33.83	35.22	36.05	37.04	40	40
33.36	34.13	33.41	36.33	40	40	40
35.69	35.88	34.48	37.55	40	40	40
34.11	33	33.12	36.58	40	40	40
34.93	34.14	34.32	35.1	40	40	40
35.23	33.23	33.01	37.05	40	40	40
33.76	33.26	40	34	40	40	40
34.41	32.88	35.29	37.11	40	40	40
33.57	32.84	38.14	35.76	40	40	40
34.56	33.42	35.31	35.83	40	40	40
35.21	33.77	36.13	37.23	40	40	40
36.96	35.21	34.73	35.63	40	40	40
40	33.73	40	35.38	40	40	40
36.03	32.92	34.16	36.29	40	40	40
37.04	33.96	35.52	40	36.3	40	40
34.85	33.63	40	40	39.78	40	40
36.77	33.89	40	36.65	39.91	40	40
34.22	40	33.81	36.19	40	40	40
35.07	40	40	35.5	40	40	40
35.6	33.66	35.64	37.65	36.17	40	40
35.04	35.32	40	35.72	35.22	40	40
35.17	33.08	34.2	35.65	36.4	40	40
34.47	33.61	40	34.85	35.51	40	40
35.09	34.09	34.05	35.04	40	40	40
33.74	32.94	35.18	40	40	40	40
35.05	35.21	33.51	35.25	37.09	40	40
35.25	36.74	40	40	40	40	40
36	33.29	33.26	36.23	36.8	40	40
40	33.79	35.14	35.18	35.45	40	40
35.12	33.18	33.22	34.3	40	40	40
35.17	34.79	33.86	35.67	40	40	40
34.18	33.98	33.88	35.23	40	40	40
35.44	33.33	34.13	36.21	40	40	40
34.51	33.22	35.09	40	40	40	40
39.31	33.19	33.3	36.51	40	40	40
34.68	33.06	33.04	36.82	40	40	40
36.46	33.67	34.11	36.53	40	40	40
35.56	32.76	33.93	35.54	40	40	40
36.24	34.5	34.98	36.08	40	40	40
40	33.04	37.15	40	40	40	40
37.27	32.79	37.66	40	40	40	40
33.5	34.6	35.4	34.2	40	40	40
36.09	33.78	35.92	35.82	40	40	40
35.4	33.6	32.51	37.45	40	40	40
34.35	33.46	32.5	35.51	40	40	40
35.74	33.22	34.03	34.41	40	40	40
35.51	33.55	34.06	36.06	36.95	40	40
34.5	33.19	34	35.17	40	40	40
35.62	34.23	34.68	34.41	40	40	40
32.53	31.16	34.72	40	37.27	40	34.1
34.28	31.95	36.68	40	40	40	40
32.14	40	34.29	40	33.85	40	36.53
33.02	40	34.41	40	40	40	40
35.5	33.28	34.29	37.42	40	40	40
33.69	32.22	33.57	35.67	36.4	40	40
35.39	33.92	34.04	36.28	36.1	40	40
35.73	33.4	36.53	34.57	37.32	40	40
34.71	33.65	33.63	35	40	40	40
33.37	34.63	32.36	40	40	40	40
34.32	33.17	33.75	35.03	40	40	40
35.03	34.29	36.15	40	37.9	40	40
34.49	33.51	40	35.98	37.03	40	40
34.99	33.23	40	36.24	40	40	40
34.45	33.12	34.83	34.48	40	40	40
36.96	33.77	37.82	35.72	36.3	40	40
34.49	33.82	34.3	38.14	34.76	40	40
34.62	36.38	36.1	36.31	40	40	40
35.99	33.03	35.26	34.69	40	40	40
35.01	34.07	35.18	35.53	40	40	40
35.3	33.6	40	35.52	40	40	40
37.27	36.45	40	34.38	36.2	40	40
35.54	33.39	35.1	35.81	40	40	40
40	33.38	32.52	35.52	34.2	40	40
35.32	33.65	35.1	40	34.67	40	36.78
37.76	40	40	40	40	40	35.09
33.09	40	33.63	40	40	40	40
33.2	40	40	40	40	40	40
33.22	37.96	34.48	40	34.31	40	40
32.67	36.11	35.58	40	36.74	40	40
32.48	40	36.81	40	40	40	40
33.1	34.08	35.85	40	40	40	36.69
32.74	32.73	34.03	40	40	40	40
32.99	31.24	34.56	40	40	40	37.29
33.24	33.99	36.58	40	40	40	40
34.11	36.55	36.69	40	40	40	40
33.94	31.7	33.77	40	40	40	40
33.84	40	35.56	40	33.33	40	40
34.94	40	33.17	40	40	40	40
33.92	34.46	34.84	40	40	40	40
34.75	40	34.28	40	40	40	40
33.79	40	35.14	40	40	40	38.1
34.53	31.71	35.34	40	40	40	36.48
34.28	40	35.62	40	40	40	36.12
32.84	33.4	33.89	40	40	40	37.24
32.86	40	33.43	40	40	40	35.52
32.81	40	34.15	40	40	40	40
32.9	36.99	35.4	40	40	40	40
34.28	40	34.4	40	40	40	39.09
34.2	37.88	36.26	40	37.6	40	40
32.26	40	34.11	40	38.11	40	35.68
33.63	40	33.89	40	37.38	40	40
33.16	31.74	40	40	35.51	40	36.15
32.66	40	40	40	35.52	40	40
33.42	40	35.57	40	40	40	34.87
33.13	40	34.82	40	40	40	40
33.43	34.04	35.89	40	40	40	36.6
33.22	40	40	40	33.92	40	36.83
33.06	40	33.95	40	40	40	36.77
40	40	35.9	40	40	40	36.63
33.43	40	34.42	40	36.5	40	34.59
35.13	40	36.87	40	40	40	40
33.03	34.46	37.13	40	40	40	34.96
34.14	40	40	40	40	40	40
33.01	40	40	40	37.92	40	40
33.5	40	40	40	40	40	37.09
32.6	40	34.37	40	40	40	37.51
33.88	40	36.32	40	40	40	40
33.66	37.13	35.36	40	40	40	35.29
33.26	36.41	36.56	40	40	40	37.22
32.99	34.59	34.5	40	39.68	40	35.02
33	40	34.78	40	40	40	40
32.62	40	36.37	40	34.44	40	37.46
33.36	37.49	40	40	35.49	40	40
33.19	40	35.5	40	40	40	36.63
34.7	34.98	36.4	40	40	40	40
32.16	40	33.55	40	36.12	40	40
32.85	40	36.02	40	40	40	40
33.23	40	34.56	40	40	40	40
32.26	40	34.78	40	40	40	35.64
34.47	40	34.55	40	40	40	40
40	40	34.84	40	40	40	40
34.9	40	34.05	40	40	40	36.8
35.26	40	35.77	40	40	40	35.44
32.98	30.31	35.86	40	32.82	40	37.01
34.09	34.31	37.29	40	40	40	36.56
32.85	36.93	34.82	40	40	40	36.09
33.55	36.91	36.62	40	40	40	35.67
34.99	40	34.08	40	34.37	40	40
35.99	40	34.98	40	40	40	40
33.45	36.21	35.1	40	40	40	36.34
32.81	40	40	40	40	40	35.1
32.35	40	35.04	40	36.1	40	35.57
32.62	31.57	34.85	40	40	40	35.03
37.4	32.07	35.06	40	40	40	40
34.61	40	35.67	40	40	40	40
34.88	31.29	34.73	40	40	40	37.01
33.92	33.16	35.81	40	37.23	40	40
34.38	32.57	34.3	40	40	40	35.84
34.46	40	34.64	40	40	40	40
33.22	34.31	40	40	40	40	36.67
32.99	32.76	40	40	36.23	40	40
32.23	33.01	37.08	40	40	40	40
32.31	40	35.87	40	40	40	36.07
32.64	36.06	40	40	40	40	35.13
35.41	40	38.77	40	36.06	40	40
32.64	40	37.24	40	37.43	40	40
33.12	36.07	35.7	40	32.47	40	40
33.77	40	34.54	40	40	40	35.13
34.5	40	37.18	40	40	40	40
33.05	40	34.07	40	40	40	36.27
34.89	40	40	40	40	40	40
32.68	32.33	34.75	40	40	40	36.05
33.78	40	34.62	40	36.74	40	40
32.76	40	34.14	40	34.72	40	36.06
33.34	33.96	36.1	40	40	40	36.41
33.56	40	34.44	40	35.37	40	36.42
37.11	40	34.26	40	32.62	40	37.96
33.18	34.46	37.01	40	40	40	35.08
35.38	40	40	40	37.34	40	40
33.09	34.44	35.89	40	36.28	40	38.13
34.8	33.16	40	40	36.06	40	40
33.73	31.91	35.25	40	34.2	40	34.48
35.26	40	34.65	40	40	40	36.75
32.56	40	34.06	40	40	40	36.7
32.66	40	34.72	40	40	40	40
34.17	36.2	34.14	40	40	40	35.87
33.49	34.37	34.53	40	33.91	40	35.74
32.63	31.44	34.74	40	36.88	40	37.75
33.49	31.78	35.51	40	34.35	40	35.82
35.79	40	33.82	40	40	40	35.63
33.75	40	35.16	40	40	40	36.2
32.42	40	35.2	40	36.05	40	37.83
32.57	40	36.38	40	40	40	40
35.69	40	33.89	40	40	40	40
33.49	40	34.9	40	37.4	40	36.14
35.16	40	38.51	40	40	40	35.35
34.13	34.18	35.06	40	40	40	36.43
36.09	34.08	34.05	40	40	40	40
33.27	40	35.45	40	40	40	40
33.18	40	35.37	40	40	40	36.11
33.25	40	35.07	40	40	40	40
34.08	40	33.96	40	40	40	40
35.74	35.75	34.84	40	40	40	40
32.96	34.23	35	40	40	40	36.11
32.88	40	34.91	40	36.28	40	36.67
32.38	35.56	34.05	40	40	40	34.64
32.55	40	36.28	40	36.11	40	37.92
33.09	40	34.32	40	35.59	40	34.36
32.92	36.18	33.49	40	40	40	37.96
33.29	33.65	35.43	40	40	40	40
34.26	40	40	40	35.49	40	40
34	40	34.24	40	40	40	35.06
33.7	40	36.19	40	35.75	40	40
32.74	35.69	35.33	40	40	40	37.01
33.18	35.5	36.38	40	35.72	40	40
33.51	40	35.9	40	36.06	40	36.66
35.28	40	37.33	40	40	40	40
32.4	33.27	35.61	40	40	40	36.28
33.62	36.5	37.2	40	40	40	40
32.36	34.08	33.71	40	37.69	40	36.46
34.27	33.35	35.76	40	40	40	36.38
32.37	40	34.52	40	40	40	40
34.8	31.34	39.84	40	40	40	40
32.42	40	35.13	40	40	40	40
32.22	40	40	40	40	40	40
32.43	40	34.41	40	35.62	40	36.73
33.44	40	40	40	34.86	40	36.21
33.61	35.05	40	40	40	40	35.83
32.65	40	40	40	35.93	40	40
32.83	40	40	40	40	40	40
32.92	40	40	40	36.65	40	36.98
31.87	32.8	36	40	34.86	40	35.7
32.95	34.38	36.28	40	31.05	40	40
33.4	31.28	35.28	40	37.08	40	40
33	32.55	34.22	40	36.43	40	40
40	40	34.92	40	33.58	40	40
40	40	36.3	40	34.18	40	34.85
33.11	40	35.23	40	40	40	40
33.64	40	36.1	40	40	40	36.29
32.7	40	36.55	40	35.63	40	35.79
33.31	40	35.52	40	33.2	40	40
33.31	40	36.21	40	40	40	40
32.79	34.17	34.6	40	35.12	40	36.08
32.25	40	40	40	33.75	40	39.76
32.87	40	37.43	40	36.06	40	36.23
35.21	40	35.03	40	36.69	40	36.11
35.43	32.73	37.59	40	40	40	34.84
40	40	40	40	40	40	40
40	40	40	40	40	40	40
40	40	40	40	40	40	40
40	40	40	40	40	40	40
40	40	40	40	40	40	40
40	40	40	40	40	40	40
40	40	40	40	40	40	40
40	40	40	40	40	40	40
32.87	33.17	34.1	40	35.82	40	40
32.34	40	37.77	40	32.82	40	40
32.97	40	37.36	40	34.58	40	34.98
32.72	34.64	37.63	40	38.01	40	36.8
40	40	36.79	40	36.59	40	40
40	40	35.07	40	40	40	40
32.14	40	34.04	40	36.14	40	35.61
33.56	40	37.94	40	35.6	40	40
33.32	40	34.59	40	37.05	40	36.21
32.26	34.51	38.08	40	34.07	40	37.09
32.34	40	34.45	40	37.16	40	40
32.19	40	35.19	40	33.26	40	40
33.15	40	35.1	40	40	40	37.36
33.78	40	37.57	40	40	40	37.26
33.58	35.3	35.64	40	35.95	40	36.26
33.13	34.32	35.59	40	36.38	40	40

## Sheet: P6
reactions for which a Ct value is not obtained are set at "40"
Time 2	Time 3	Time 4	Time 5	Time 6	Time 7	Time 8
38.46	40	36.62	40	37.54	34.57	34.34
36.96	40	37.34	40	40	37.22	35.11
34.7	40	35.72	40	35.64	40	33.86
36.11	40	36.62	40	37.99	40	34.24
36.02	40	34.46	40	40	40	35
37.24	40	37.57	40	40	40	35.45
34.67	40	36.54	40	35.52	40	34.2
34.73	40	35.97	40	40	40	34.9
36.54	40	36.15	40	34.36	40	35.01
37.28	40	37.28	40	40	40	35.1
37.49	40	36.4	40	37.42	40	34.19
40	40	36.12	40	35.67	40	35.79
36.62	40	35.95	40	40	40	35.03
34.78	40	35.73	40	40	40	40
39.01	40	37.38	40	40	40	35.22
34.85	40	35.89	40	40	40	34.38
38.18	40	35.71	40	34.77	40	34.06
35	40	35.48	40	37.03	40	36.49
37.29	40	35.05	40	35.12	40	35.3
36.05	40	35.7	40	35.11	40	34.56
36.44	40	40	40	36.8	40	33.52
37.56	40	40	40	35.91	40	35.83
35.28	40	35.42	40	34.97	40	33.49
37.1	40	36.34	40	39.82	40	36.11
34.78	40	35.11	40	35.88	40	35.21
37.01	40	36.32	40	40	40	35.81
35.83	40	36.78	40	36.06	40	34.48
36.56	40	40	40	40	40	36.35
36.95	40	40	40	40	40	34.7
36.36	40	40	40	40	40	35.66
40	40	36.15	40	37.29	40	34.65
35.51	40	38.26	40	40	40	35.07
40	40	36.69	40	35.88	40	34.09
37.46	40	36.24	40	40	40	39.98
36.9	40	37.39	40	40	40	35.32
34.98	40	40	40	40	40	38.27
34.6	40	36.29	40	37.23	40	35.5
35.71	40	40	40	40	40	35.61
40	40	36.45	40	36.23	40	34.56
35.81	40	35.37	40	35.87	40	40
35.04	40	36	40	36.43	40	35.97
40	40	36.44	40	37.35	40	40
35.84	40	35.42	40	40	40	40
40	40	35.3	40	40	40	35.72
35.75	40	40	40	40	40	35.2
40	40	40	40	40	40	34.58
40	40	35.98	40	35.53	40	34.58
36.23	40	35.07	40	40	40	34.34
40	40	35.43	40	35.97	40	35.05
36.38	40	34.99	40	37.25	40	35.56
35.61	40	36.17	40	40	40	33.59
36.22	40	37.12	40	40	40	37
35.69	40	34.5	40	37.24	40	34.39
36.39	40	36.13	40	40	40	36.28
37.52	40	34.64	40	37.28	40	34.42
36.65	40	40	40	40	40	34.86
35.94	40	40	40	37.24	40	35.08
36.02	40	34.04	40	40	40	36.2
36.19	40	36.14	40	40	40	34.05
37.28	40	40	40	40	40	40
37.09	40	36.92	40	40	40	37.76
35.16	40	38.01	40	40	40	37.44
36.19	40	36.47	40	40	40	34.46
40	40	36.29	40	40	40	33.69
40	40	36.17	40	35.98	40	33.71
36.48	40	35.71	40	37.88	40	37.33
40	40	35.78	40	40	40	33.53
35.54	40	36.64	40	36.86	40	35.05
35.79	40	35.28	40	36.55	40	35.39
34.3	40	40	40	36.23	40	35.92
36.36	40	36.55	40	34.5	40	34.02
40	40	38.68	40	40	40	35.26
35.9	40	36.96	40	40	40	35.35
35.78	40	40	40	40	40	36.15
36.55	40	40	40	40	40	35.59
36.18	40	40	40	40	40	35.67
34.82	40	35.59	40	40	40	34.52
36.02	40	40	40	40	40	40
35.84	40	37.45	40	35.68	40	34.44
36.27	40	40	40	40	40	37.23
35.46	40	35.74	40	36.24	40	36.32
36.56	40	36.43	40	40	40	37.52
40	40	40	40	40	40	35.35
40	40	36.1	40	40	40	40
38.11	40	40	40	40	40	33.49
35.06	40	40	40	40	40	40
39	40	39.63	40	40	40	34.34
37.08	40	40	40	36.33	40	36.73
36.14	40	37.84	40	40	40	35.18
40	40	40	40	37.17	40	40
40	40	36.93	40	37.22	40	34.28
36.33	40	34.51	40	37.48	40	36.12
40	40	35.65	40	40	40	33.57
36.01	40	35.32	40	36.26	40	37.25
40	40	36.72	40	40	40	34.19
35.41	40	36.92	40	40	40	37.78
37.01	40	36.28	40	36.18	40	35.09
40	40	34.65	40	34.68	40	33.56
38.12	40	36.74	40	33.96	40	33.68
35.04	40	34.71	40	40	40	34.83
35.58	40	37.34	40	40	40	34.77
38.47	40	36.08	40	40	40	34.12
40	40	37.8	40	36.78	40	35.23
36.73	40	40	40	40	40	34.6
35.97	40	36.65	40	40	40	34.42
35.37	40	35.77	40	40	40	35.81
35.41	40	36.59	40	40	40	34.2
36.48	40	37.17	40	37.41	40	34.57
38.26	40	34.41	40	40	40	35.04
37.15	40	40	40	40	40	35.43
34.28	40	36.52	40	40	40	34.36
36.45	40	36.11	40	40	40	35.1
36.35	40	36.08	40	40	40	34.05
37.2	40	36.44	40	40	40	40
35.08	40	35.96	40	40	40	34.25
40	40	40	40	40	40	35.18
35.63	40	40	40	37.04	40	34.67
34.56	40	38.59	40	34.76	40	36.96
36.22	40	36.39	40	40	40	34.16
38.11	40	35.81	40	40	40	37.17
37.52	40	34.44	40	40	40	33.83
36.27	40	37.46	40	36.6	40	35.1
35.44	40	34.65	40	35.18	40	37.07
37.12	40	36.77	40	40	40	34.81
40	40	35.07	40	37.12	40	34.05
35.18	40	34.76	40	35.07	40	36.78
40	40	38.33	40	34.81	40	34.4
40	40	33.7	40	35.62	40	37.37
34.36	40	36.64	40	40	40	36.19
36	40	40	40	36.14	40	35.52
35.36	40	36.27	40	35.89	40	34.5
35.21	40	34.31	40	40	40	34.05
35.64	40	35.4	40	40	40	34.14
40	40	33.77	40	36.08	40	40
40	40	34.23	40	37.5	40	34.13
37.69	40	33.73	40	40	40	35
37.14	40	34.65	40	40	40	35.09
35.36	40	33.94	40	40	40	40
40	40	35.71	40	35.5	40	33.53
36.32	40	37.31	40	34.98	40	36.11
35.12	40	34.92	40	35.08	40	35.1
36.93	40	35.08	40	36.42	40	40
35.09	40	35.05	40	40	40	33.74
35.05	40	34.74	40	40	40	35.4
35.81	40	36.39	40	37.31	40	35.15
35.13	40	36.87	40	35.86	40	35.11
37.46	40	36.97	36.44	40	40	34.29
36.21	40	34.95	40	40	40	34.66
36.52	40	35.23	40	40	40	34.12
40	40	35.58	40	40	40	36.07
35.63	40	35.83	40	40	40	35.48
35.21	40	37.28	40	40	40	34.18
40	40	36.01	40	37.36	40	34.45
40	40	36.68	40	37.16	40	34.73
36.92	40	40	40	35.87	40	35.9
35.5	40	40	40	35.87	40	34.31
40	40	35.08	40	40	40	33.85
36.59	40	40	40	40	40	37.59
35.34	40	34.22	40	40	40	34.73
39.02	40	35.21	40	40	40	36.61
37.9	40	37.51	40	40	40	34.03
34.84	40	35.3	40	40	40	35.12
40	40	40	36.01	40	40	34.47
36.1	40	40	40	37.38	40	34.5
35.24	40	40	40	40	40	35.45
34.47	40	40	40	40	40	37.35
33.47	40	40	40	40	40	34.34
35.55	40	40	40	40	40	34.78
35.53	40	36.17	40	35.73	40	35.04
36.99	40	35.02	40	40	40	36
35.38	40	34.37	40	40	40	33.71
37.07	40	34.82	40	40	40	34.47
35.12	40	34.38	40	40	40	34.33
34.75	40	36.36	40	36.05	40	35.19
35.43	40	37.22	40	35.1	40	34.49
40	40	38.3	40	40	40	35.27
37.33	40	35.94	40	40	40	35.57
37.11	40	40	40	40	40	37.05
34.69	40	35.9	40	36.33	40	34.08
40	40	34.77	40	36.07	40	35.77
36.72	40	34.58	40	40	40	34.5
36.41	40	36.35	40	39.24	40	37.28
36.41	40	36.42	40	40	40	33.56
40	40	40	40	40	40	40
40	40	34.4	40	35.06	40	34.82
35.46	40	40	40	37.16	40	40
40	40	34.7	40	36.1	40	35.31
35.77	40	34.13	40	40	40	34.8
37.76	40	40	40	40	40	35.24
40	40	40	40	40	40	35.34
34.61	40	40	40	40	40	34.99
34.45	40	40	40	40	40	36.65
37.12	40	40	40	40	40	34.23
40	40	40	40	40	40	37.2
35.97	40	40	40	40	40	35.04
34.75	40	40	40	40	40	35.57
40	40	40	40	40	40	40
40	40	40	40	40	40	38.43
40	40	40	40	40	40	37.54
40	40	40	40	40	40	35.44
35.87	40	40	40	40	40	34.12
38.34	40	40	40	40	40	36.45
35.01	40	40	40	40	40	40
40	40	40	40	40	40	34.76
40	40	40	40	40	40	33.96
35.24	40	40	40	40	40	40
36.14	40	40	40	40	40	34.5
40	40	40	40	40	40	34.82
35.49	40	40	40	40	40	35.03
40	40	40	40	40	40	34.9
34.58	40	40	40	40	40	35.42
34.64	40	40	40	40	40	34.89
34.26	40	40	40	40	40	33.78
36.52	40	40	40	40	40	40
36.69	40	40	40	40	40	35.02
35.3	40	40	40	40	40	40
36.79	40	40	40	40	40	35.87
40	40	40	40	40	40	36.67
34.3	40	40	40	40	40	36.15
34.64	40	40	40	40	40	35.35
36.57	40	40	40	40	40	40
40	40	40	40	40	40	37.23
40	40	40	40	40	40	35.91
35.16	40	40	40	40	40	40
36.25	40	39.46	40	40	40	35.69
40	40	40	40	40	40	34.32
35.87	40	40	40	40	40	35.48
35.5	40	40	40	40	40	35.36
35.77	40	40	40	40	40	34.06
37.82	40	40	40	40	40	36.43
34.48	40	40	40	40	40	35.04
40	40	40	40	40	40	37.14
34.54	40	40	40	40	40	35.17
36.49	40	40	40	40	40	35.12
34.42	40	40	40	40	40	35.37
36.72	40	40	40	40	40	35.06
34.32	40	40	40	40	40	34.64
35.76	40	40	40	40	40	36.37
35.69	40	40	40	40	40	34.69
37.88	40	40	40	40	40	40
40	40	40	40	40	40	34.24
33.7	40	40	40	40	40	35.72
34.32	40	40	40	40	40	36.94
34.68	40	40	40	40	40	36.22
40	40	40	40	40	40	36.19
36.51	40	40	40	40	40	37.15
40	40	40	40	40	40	36.56
34.46	40	40	40	40	40	34.35
40	40	40	40	40	40	40
40	40	40	40	40	40	33.93
36.62	40	40	40	40	40	34.47
35.08	40	40	40	40	40	33.85
37.58	40	40	40	40	40	33.66
40	40	40	40	40	40	36.74
35.82	40	40	40	40	40	34.2
40	40	40	40	40	40	35.01
34.64	40	40	40	40	40	33.85
37.19	40	40	40	40	40	35.08
36.77	40	40	36.7	40	40	34.24
36.3	40	40	40	40	40	34.41
37.39	40	40	40	40	40	34.55
34.14	40	40	40	40	40	35.23
36.04	40	40	40	40	40	35.33
38.07	40	40	40	40	40	36.15
36.57	40	40	40	40	40	35.01
34.44	40	40	40	40	40	36.22
34.4	40	40	40	40	40	35
40	40	40	40	40	40	35.21
36.02	40	40	40	40	40	35.37
40	40	40	40	40	40	40
37.17	40	40	40	40	40	33.71
37.32	40	40	40	40	40	34.46
36.17	40	40	40	40	40	35.37
36.44	40	40	40	40	40	35.56
34.36	40	40	40	40	40	36.13
36.64	40	40	40	40	40	35.37
36.13	40	40	40	40	40	34.91
36.5	40	40	40	40	40	40
40	40	40	40	40	40	36.29
40	40	40	40	40	40	40
36.31	40	40	40	40	40	35.87
34.66	40	40	40	40	40	36.18
36.71	40	40	40	40	40	34.49
40	40	40	40	40	40	35.58
34.79	40	40	40	40	40	40
34.41	40	40	40	40	40	38.47
35.18	40	40	40	40	40	33.89
33.05	40	40	40	40	40	40
40	40	40	40	40	40	37.02
36.91	40	40	40	40	40	35.67
34.82	40	40	40	40	40	34.58
40	40	40	40	40	40	33.87
40	40	40	40	40	40	35.58
36.7	40	40	40	40	40	36.41
37.28	40	40	40	40	40	35.86
38.02	40	40	40	40	40	35.73
40	40	40	40	40	40	35.27
35.91	40	40	40	40	40	34.56
38.38	40	40	40	40	40	34.4
35.68	40	40	40	40	40	33.28
40	40	40	40	40	40	36.43
40	40	40	40	40	40	35.09
35.26	40	40	40	40	40	35.53
36.06	40	40	40	40	40	34.38
36.24	40	40	40	40	40	40
36.16	40	40	40	40	40	35.69
34.48	40	40	40	40	40	34.04
36.09	40	40	40	40	40	34.53
34.34	40	40	40	40	40	33.97
36.18	40	40	40	40	40	33.72
36.2	40	40	40	40	40	35.41
35.1	40	40	40	39.7	40	35.8
36.46	40	40	40	40	40	35.93
40	40	40	40	40	40	35.26
38.35	40	40	40	40	40	34.8
36.32	40	40	40	40	40	35.14
40	40	40	40	40	40	35.5
40	40	40	40	40	40	34.72
36.56	40	40	40	40	40	35.11
36.3	40	40	40	40	40	40
33.78	40	40	40	40	40	38.59
40	40	40	40	40	40	37.66
33.43	40	40	40	40	40	35.47
37.01	40	40	40	40	40	33.47
38.59	40	40	40	40	40	35.62
36.32	40	40	40	40	40	36.93
35.11	40	40	40	40	40	40
35.84	40	40	40	40	40	35.12
40	40	40	40	40	40	36.2
34.2	40	40	40	40	40	37.23
34.16	40	40	40	40	40	34.31
34.91	40	40	40	40	40	34.65
34.4	40	40	40	40	40	34.32
34.87	40	40	40	40	40	35.06
35.84	40	40	40	40	40	35.48
34.73	40	40	40	40	40	40
34.19	40	40	40	40	40	34.89
36.09	40	40	40	40	40	36.37
40	40	40	40	40	40	36.34
35.22	40	40	40	40	40	40
35.32	40	40	40	40	40	34.09
35.78	40	40	40	40	40	34.68
35.6	40	40	40	40	40	34.65
33.9	40	40	40	40	40	34.43
40	40	40	40	40	40	34.1
40	40	40	40	40	40	34.09
37.16	40	40	40	40	40	36.7
33.66	40	40	40	40	40	35.4
34.32	40	40	40	40	40	37.19
34.4	40	40	40	40	40	35.37
34.02	40	40	40	40	40	36.18
34.78	40	40	40	40	40	36.24
35.54	40	40	40	40	40	35.06
33.78	40	40	40	40	40	34.68
36.34	40	40	40	40	40	40
40	40	40	40	40	40	34.02
33.92	40	40	40	40	40	34.99
36.31	40	40	40	40	40	34.93
33.37	40	40	40	40	40	35.33
34.85	40	40	40	40	40	35.01
35.02	40	40	40	40	40	35.59
40	40	40	40	40	40	35.25
40	40	40	40	40	40	40
35.18	40	40	40	40	40	36.94
33.66	40	40	40	40	40	36.36
33.87	40	40	40	40	40	39.25
40	40	40	40	40	40	37.07
37.07	40	40	40	40	40	35.11

## Sheet: P9
reactions for which a Ct value is not obtained are set at "40"
Time 2	Time 3	Time 4	Time 5	Time 6	Time 7	Time 8
32.86	40	40	40	40	40	40
34.29	40	40	40	40	40	40
33.46	40	40	40	40	40	40
34.07	40	40	40	40	40	40
33.93	40	40	40	40	40	40
33.85	40	40	40	40	40	40
33.4	40	40	40	40	40	40
34.21	40	40	40	40	40	40
33.31	40	40	40	40	40	40
33.67	40	40	40	40	40	40
33.57	40	40	40	40	40	40
35.72	40	40	40	40	40	40
33.31	40	40	40	40	40	40
34.47	40	40	40	40	40	40
33.74	40	40	40	40	40	40
35.34	40	40	40	40	40	40
32.94	40	40	40	40	40	40
35.13	40	40	40	40	40	40
34.22	40	40	40	40	40	40
33.85	40	40	40	40	40	40
33.5	40	40	40	40	40	40
33.69	40	40	40	40	40	40
33.6	40	40	40	40	40	40
33.77	40	40	40	40	40	40
34.82	40	40	40	40	40	40
36.47	40	40	40	40	40	40
35.58	40	40	40	40	40	40
34.21	40	40	40	40	40	40
36.33	40	40	40	40	40	40
35.56	40	40	40	40	40	40
34.77	40	40	40	40	40	40
40	40	40	40	40	40	40
35.27	40	40	40	40	40	40
33.32	40	40	40	40	40	40
33.57	40	40	40	40	40	40
33.88	40	40	40	40	40	40
36.12	40	40	40	40	40	40
34.53	40	40	40	40	40	40
34.28	40	40	40	40	40	40
36.11	40	40	40	40	40	40
33.25	40	40	40	40	40	40
40	40	40	40	40	40	40
34.79	40	40	40	40	40	40
34.06	40	40	40	40	40	40
33.86	40	40	40	40	40	40
34.35	40	40	40	40	40	40
32.35	40	40	40	40	40	40
35.32	40	40	40	40	40	40
33.25	40	40	40	40	40	40
33.87	40	40	40	40	40	40
33.8	40	40	40	40	40	40
34.74	40	40	40	40	40	40
33.9	40	40	40	40	40	40
33.62	40	40	40	40	40	40
33.1	40	40	40	40	40	40
34.02	40	40	40	40	40	40
35.22	40	40	40	40	40	40
34.68	40	40	40	40	40	40
32.82	40	40	40	40	40	40
33.93	40	40	40	40	40	40
33.09	40	40	40	40	40	40
33.95	40	40	40	40	40	40
33.51	40	40	40	40	40	40
34.16	40	40	40	40	40	40
33.01	40	40	40	40	40	40
35.05	40	40	40	40	40	40
33.74	40	40	40	40	40	40
34.15	40	40	40	40	40	40
34.44	40	40	40	40	40	40
34.96	40	40	40	40	40	40
33.61	40	40	40	40	40	40
33.41	40	40	40	40	40	40
33.68	40	40	40	40	40	40
33.65	40	40	40	40	40	40
32.93	40	40	40	40	40	40
35.06	40	40	40	40	40	40
34.19	40	40	40	40	40	40
34.83	40	40	40	40	40	40
34.67	40	40	40	40	40	40
40	40	40	40	40	40	40
33.68	40	40	40	40	40	40
33.14	40	40	40	40	40	40
35.88	40	40	40	40	40	40
40	40	40	40	40	40	40
36.14	40	40	40	40	40	40
37.58	40	40	40	40	40	40
33.57	40	40	40	40	40	40
33.96	40	40	40	40	40	40
34.27	40	40	40	40	40	40
34.03	40	40	40	40	40	40
33.47	40	40	40	40	40	40
34.23	40	40	40	40	40	40
33.33	40	40	40	40	40	40
34.27	40	40	40	40	40	40
34.6	40	40	40	40	40	40
34.21	40	40	40	40	40	40
33.26	40	40	40	40	40	40
33.37	40	40	40	40	40	40
33.26	40	40	40	40	40	40
33.32	40	40	40	40	40	40
34.8	40	40	40	40	40	40
33.57	40	40	40	40	40	40
33	40	40	40	40	40	40
33.31	40	40	40	40	40	40
34.01	40	40	40	40	40	40
34.45	40	40	40	40	40	40
33.61	40	40	40	40	40	40
33.97	40	40	40	40	40	40
37.02	40	40	40	40	40	40
33.75	40	40	40	40	40	40
34.79	40	40	40	40	40	40
33.21	40	40	40	40	40	40
32.86	40	40	40	40	40	40
33.68	40	40	40	40	40	40
35.06	40	40	40	40	40	40
34.21	40	40	40	40	40	40
34.11	40	40	40	40	40	40
35.01	40	40	40	40	40	40
33.15	40	40	40	40	40	40
34.21	40	40	40	40	40	40
33.39	40	40	40	40	40	40
34.07	40	40	40	40	40	40
34.9	40	40	40	40	40	40
36.77	40	40	40	40	40	40
34.03	40	40	40	40	40	40
33.15	40	40	40	40	40	40
32.67	40	40	40	40	40	40
34.06	40	40	40	40	40	40
35.21	40	40	40	40	40	40
33.28	40	40	40	40	40	40
34.03	40	40	40	40	40	40
33.06	40	40	40	40	40	40
32.67	40	40	40	40	40	40
32.57	40	40	40	40	40	40
34.37	40	40	40	40	40	40
33.65	40	40	40	40	40	40
34.29	40	40	40	40	40	40
34.05	40	40	40	40	40	40
33.28	40	40	40	40	40	40
33.69	40	40	40	40	40	40
33.01	40	40	40	40	40	40
34.44	40	40	40	40	40	40
34.81	40	40	40	40	40	40
33.94	40	40	40	40	40	40
34.61	40	40	40	40	40	40
33.78	40	40	40	40	40	40
33.24	40	40	40	40	40	40
33.86	40	40	40	40	40	40
33.72	40	40	40	40	40	40
34.45	40	40	40	40	40	40
33.18	40	40	40	40	40	40
36.39	40	40	40	40	40	40
34.58	40	40	40	40	40	40
35.29	40	40	40	40	40	40
37.43	40	40	40	40	40	40
40	40	40	40	40	40	40
34.27	40	40	40	40	40	40
35.7	40	40	40	40	40	40
35.29	40	40	40	40	40	40
35.09	40	40	40	40	40	40
33.64	40	40	40	40	40	40
33.02	40	40	40	40	40	40
33.32	40	40	40	40	40	40
34.21	40	40	40	40	40	40
35.32	40	40	40	40	40	40
34.9	40	40	40	40	40	40
35.37	40	40	40	40	40	40
35.14	40	40	40	40	40	40
34.06	40	40	40	40	40	40
34.2	40	40	40	40	40	40
34.35	40	40	40	40	40	40
33.12	40	40	40	40	40	40
33.47	40	40	40	40	40	40
40	40	40	40	40	40	40
36.05	40	40	40	40	40	40
37.18	40	40	40	40	40	40
33.35	40	40	40	40	40	40
34.43	40	40	40	40	40	40
34.76	40	40	40	40	40	40
36.01	40	40	40	40	40	40
33.9	40	40	40	40	40	40
34.86	40	40	40	40	40	40
34.04	40	40	40	40	40	40
34.71	40	40	40	40	40	40
33.04	40	40	40	40	40	40
33.15	40	40	40	40	40	40
34.02	40	40	40	40	40	40
33.5	40	40	40	40	40	40
36.61	40	40	40	40	40	40
35.88	40	40	40	40	40	40
35.06	40	40	40	40	40	40
37.48	40	40	40	40	40	40
34.64	40	40	40	40	40	40
34.24	40	40	40	40	40	40
35.16	40	40	40	40	40	40
35.1	40	40	40	40	40	40
33.93	40	40	40	40	40	40
34.94	40	40	40	40	40	40
34.44	40	40	40	40	40	40
35.32	40	40	40	40	40	40
36.46	40	40	40	40	40	40
35.15	40	40	40	40	40	40
35.37	40	40	40	40	40	40
35.12	40	40	40	40	40	40
35.94	40	40	40	40	40	40
35.11	40	40	40	40	40	40
36.18	40	40	40	40	40	40
35.7	40	40	40	40	40	40
34.53	40	40	40	40	40	40
36.96	40	40	40	40	40	40
34.56	40	40	40	40	40	40
40	40	40	40	40	40	40
34.34	40	40	40	40	40	40
36.32	40	40	40	40	40	40
40	40	40	40	40	40	40
35.47	40	40	40	40	40	40
34.15	40	40	40	40	40	40
34.01	40	40	40	40	40	40
34.44	40	40	40	40	40	40
34.65	40	40	40	40	40	40
35.3	40	40	40	40	40	40
40	40	40	40	40	40	40
36.7	40	40	40	40	40	40
40	40	40	40	40	40	40
34.38	40	40	40	40	40	40
34.05	40	40	40	40	40	40
34.51	40	40	40	40	40	40
40	40	40	40	40	40	40
34.94	40	40	40	40	40	40
37.56	40	40	40	40	40	40
34.7	40	40	40	40	40	40
35.8	40	40	40	40	40	40
35.03	40	40	40	40	40	40
33.92	40	40	40	40	40	40
35.97	40	40	40	40	40	40
36.83	40	40	40	40	40	40
33.08	40	40	40	40	40	40
35.23	40	40	40	40	40	40
36.46	40	40	40	40	40	40
40	40	40	40	40	40	40
37.08	40	40	40	40	40	40
34.32	40	40	40	40	40	40
40	40	40	40	40	40	40
36.07	40	40	40	40	40	40
35.08	40	40	40	40	40	40
34.48	40	40	40	40	40	40
35.25	40	40	40	40	40	40
37.57	40	40	40	40	40	40
37.5	40	40	40	40	40	40
37.02	40	40	40	40	40	40
34.34	40	40	40	40	40	40
35.41	40	40	40	40	40	40
35.74	40	40	40	40	40	40
40	40	40	40	40	40	40
36.44	40	40	40	40	40	40
38.04	40	40	40	40	40	40
36.72	40	40	40	40	40	40
37.93	40	40	40	40	40	40
35.55	40	40	40	40	40	40
36.55	40	40	40	40	40	40
40	40	40	40	40	40	40
35.99	40	40	40	40	40	40
35.36	40	40	40	40	40	40
37.87	40	40	40	40	40	40
33.49	40	40	40	40	40	40
35.96	40	40	40	40	40	40
36.43	40	40	40	40	40	40
40	40	40	40	40	40	40
34.91	40	40	40	40	40	40
35.18	40	40	40	40	40	40
34.01	40	40	40	40	40	40
35.35	40	40	40	40	40	40
37.65	40	40	40	40	40	40
40	40	40	40	40	40	40
34.32	40	40	40	40	40	40
34.71	40	40	40	40	40	40
35.1	40	40	40	40	40	40
35.03	40	40	40	40	40	40
35.02	40	40	40	40	40	40
39.34	40	40	40	40	40	40
34.59	40	40	40	40	40	40
35.63	40	40	40	40	40	40
37.13	40	40	40	40	40	40
40	40	40	40	40	40	40
35.65	40	40	40	40	40	40
36.14	40	40	40	40	40	40
34.19	40	40	40	40	40	40
40	40	40	40	40	40	40
32.94	40	40	40	40	40	40
33.74	40	40	40	40	40	40
34.54	40	40	40	40	40	40
33.78	40	40	40	40	40	40
35.13	40	40	40	40	40	40
35.33	40	40	40	40	40	40
35.89	40	40	40	40	40	40
35.01	40	40	40	40	40	40
34.74	40	40	40	40	40	40
35.78	40	40	40	40	40	40
35.19	40	40	40	40	40	40
35.48	40	40	40	40	40	40
37.4	40	40	40	40	40	40
38.42	40	40	40	40	40	40
36.38	40	40	40	40	40	40
36.29	40	40	40	40	40	40
36.18	40	40	40	40	40	40
40	40	40	40	40	40	40
36.44	40	40	40	40	40	40
40	40	40	40	40	40	40
34.98	40	40	40	40	40	40
34.6	40	40	40	40	40	40
34.73	40	40	40	40	40	40
35.26	40	40	40	40	40	40
34.33	40	40	40	40	40	40
33.6	40	40	40	40	40	40
34.31	40	40	40	40	40	40
38.47	40	40	40	40	40	40
34.05	40	40	40	40	40	40
33.55	40	40	40	40	40	40
33.72	40	40	40	40	40	40
33.11	40	40	40	40	40	40
35.05	40	40	40	40	40	40
33.75	40	40	40	40	40	40
34.39	40	40	40	40	40	40
32.95	40	40	40	40	40	40
35.03	40	40	40	40	40	40
35.75	40	40	40	40	40	40
34.9	40	40	40	40	40	40
37.08	40	40	40	40	40	40
36.84	40	40	40	40	40	40
34.18	40	40	40	40	40	40
34.84	40	40	40	40	40	40
35.69	40	40	40	40	40	40
34.84	40	40	40	40	40	40
37.72	40	40	40	40	40	40
33.78	40	40	40	40	40	40
35.7	40	40	40	40	40	40
37.81	40	40	40	40	40	40
36.52	40	40	40	40	40	40
36.59	40	40	40	40	40	40
34.15	40	40	40	40	40	40
40	40	40	40	40	40	40
32.85	40	40	40	40	40	40
40	40	40	40	40	40	40
36.59	40	40	40	40	40	40
36.9	40	40	40	40	40	40
34.85	40	40	40	40	40	40
35.64	40	40	40	40	40	40
35.18	40	40	40	40	40	40
34.74	40	40	40	40	40	40
37.16	40	40	40	40	40	40
33.57	40	40	40	40	40	40
34.63	40	40	40	40	40	40
40	40	40	40	40	40	40
40	40	40	40	40	40	40
40	40	40	40	40	40	40
40	40	40	40	40	40	40
40	40	40	40	40	40	40
40	40	40	40	40	40	40
40	40	40	40	40	40	40
40	40	40	40	40	40	40
35.45	40	40	40	40	40	40
38.15	40	40	40	40	40	40
35.34	40	40	40	40	40	40
33.77	40	40	40	40	40	40
34.09	40	40	40	40	40	40
34.07	40	40	40	40	40	40
34.67	40	40	40	40	40	40
34.09	40	40	40	40	40	40
34.95	40	40	40	40	40	40
33.77	40	40	40	40	40	40
34.8	40	40	40	40	40	40
33.44	40	40	40	40	40	40
34.4	40	40	40	40	40	40
34.02	40	40	40	40	40	40
36.2	40	40	40	40	40	40
34.55	40	40	40	40	40	40

## Sheet: P11
reactions for which a Ct value is not obtained are set at "40"
Time 2	Time 3	Time 4	Time 5	Time 6	Time 7	Time 8
34.37	37.03	40	37.74	36.1	37.04	40
40	36.31	40	34.82	40	37.04	40
40	37.71	40	40	40	36.54	36.88
40	36.35	40	40	40	40	40
40	40	40	40	40	40	35.79
40	40	40	40	40	40	36.37
40	40	40	40	40	40	40
40	40	40	40	40	40	40
40	40	40	40	40	40	35.52
40	40	40	40	40	40	36.42
40	40	40	40	40	40	40
40	40	40	40	40	40	36.7
40	40	40	40	40	40	35.73
40	40	40	40	40	40	40
40	40	40	40	40	40	36.25
40	40	40	40	40	40	40
40	40	40	40	40	40	40
40	40	40	40	40	40	35.99
40	40	40	40	40	40	36.73
40	40	40	40	40	40	35.3
40	40	40	40	40	40	39.16
40	40	40	40	40	40	35.1
40	40	40	40	40	40	40
40	40	40	40	40	40	40
40	40	40	40	40	40	40
40	40	40	40	40	40	40
40	40	40	40	40	40	40
40	40	40	40	40	40	36.24
40	40	40	40	40	40	36.05
40	40	40	40	40	40	40
40	40	40	40	40	40	40
40	40	40	40	40	40	40
40	40	40	40	40	40	40
40	40	40	40	40	40	40
40	40	40	40	40	40	34.6
40	40	40	40	40	40	36.15
40	40	40	40	40	40	36.4
40	40	40	40	40	40	40
40	40	40	40	40	40	35.31
40	40	40	40	40	40	37.56
40	40	40	40	40	40	36.89
40	40	40	40	40	40	40
40	40	40	40	40	40	36.66
40	40	40	40	40	40	40
40	40	40	40	40	40	40
40	40	40	40	40	40	35.47
40	40	40	40	40	40	40
40	40	40	40	40	40	36.94
40	40	40	40	40	40	35.02
40	40	40	40	40	40	40
40	40	40	40	40	40	35.54
40	40	40	40	40	40	34.65
40	40	40	40	40	40	35.8
40	40	40	40	40	40	38.33
40	40	40	40	40	40	35.01
40	40	40	40	40	40	36.82
40	40	40	40	40	40	40
40	40	40	40	40	40	35.05
40	40	40	40	40	40	40
40	40	40	40	40	40	36.01
40	40	40	40	40	40	35.92
40	40	40	40	40	40	38.77
40	40	40	40	40	40	40
40	40	40	40	40	40	38.68
40	40	40	40	40	40	35.59
40	40	40	40	40	40	40
40	40	40	40	40	40	40
40	40	40	40	40	40	40
40	40	40	40	40	40	40
40	40	40	40	40	40	40
40	40	40	40	40	40	40
40	40	40	40	40	40	35.29
40	40	40	40	40	40	40
40	40	40	40	40	40	40
40	40	40	40	40	40	37.15
40	40	40	40	40	40	36.46
40	40	40	40	40	40	34.01
40	40	37.7	40	40	40	40
40	40	40	40	40	40	35.12
40	40	40	40	40	40	35.9
40	40	40	40	40	40	35.43
40	40	40	40	40	40	40
40	40	40	40	40	40	40
40	40	40	40	40	40	40
40	40	40	40	40	40	40
40	40	40	40	40	40	36.22
40	40	40	40	40	40	35.3
40	40	40	40	40	40	40
40	40	40	40	40	40	40
40	40	40	40	40	40	40
40	40	40	40	40	40	35.23
40	40	40	40	40	40	36.07
40	40	40	40	40	40	37.01
40	40	40	40	40	40	37.22
40	40	40	40	40	40	34.29
40	40	40	40	40	40	36.83
40	40	40	40	40	40	37.11
40	40	40	40	40	40	36.3
40	40	37.42	40	40	40	40
40	40	40	40	40	40	34.8
40	40	40	40	40	40	40
40	40	40	40	40	40	36.33
40	40	40	40	40	40	35.73
40	40	40	40	40	40	40
40	40	40	40	40	40	40
40	40	40	40	40	40	36.15
40	40	40	40	40	40	35.59
40	40	40	40	40	40	38.33
40	40	40	40	40	40	40
40	40	40	40	40	40	40
40	40	40	40	40	40	36.93
40	40	40	40	40	40	40
40	40	40	40	40	40	38.63
40	40	40	40	40	40	36.9
40	40	40	40	40	40	35.52
40	40	40	40	40	40	40
40	40	40	40	40	40	36.35
40	40	40	40	40	40	35.38
40	40	40	40	40	40	35.81
40	40	40	40	40	40	39.39
40	40	40	40	40	40	40
40	40	40	40	40	40	40
40	40	40	40	40	40	35.41
40	40	40	40	40	40	40
40	40	40	40	40	40	40
40	40	40	40	40	40	40
40	40	40	40	40	40	40
40	40	40	40	40	40	40
40	40	40	40	40	40	34.55
40	40	40	40	40	40	40
40	40	40	40	40	40	36.15
40	40	40	40	40	40	40
40	40	40	40	40	40	40
40	40	40	40	40	40	40
40	40	40	40	40	40	36.23
40	40	40	40	40	40	40
40	40	40	40	40	40	36.87
40	40	40	40	40	40	40
40	40	40	40	40	40	37.17
40	40	40	40	40	40	40
40	40	40	40	40	40	40
40	40	40	40	40	40	37.36
40	40	40	40	40	40	35.54
40	40	40	40	40	40	40
40	40	40	40	40	40	35.66
40	40	40	40	40	40	35.95
40	40	40	40	40	40	40
40	40	40	40	40	40	34.54
40	40	40	40	40	40	40
40	40	40	40	40	40	34.02
40	40	40	40	40	40	36.01
40	40	40	40	40	40	40
40	40	40	40	40	40	40
40	40	40	40	40	40	35.21
40	40	40	40	40	40	36.51
40	40	40	40	40	40	35.41
40	40	40	40	40	40	38.7
40	40	40	40	40	40	40
40	40	40	40	40	40	36.53
40	40	40	40	40	40	40
40	40	40	40	40	40	37.18
40	40	40	40	40	40	40
40	40	40	40	40	40	40
40	40	37.08	40	40	40	38.43
40	40	35.74	40	40	40	35.49
40	40	40	40	40	40	35.66
40	40	37.43	40	40	40	40
40	40	40	40	40	40	40
40	40	40	40	40	40	40
40	40	40	40	40	40	40
40	40	40	40	40	40	37.04
40	40	40	40	40	40	40
40	40	40	40	40	40	35.71
40	40	40	40	40	40	36.77
40	40	40	40	40	40	35.11
40	40	40	40	40	40	40
40	40	40	40	40	40	35.58
40	40	40	40	40	40	40
40	40	40	40	40	40	40
40	40	40	40	40	40	40
40	40	40	40	40	40	36.49
40	40	40	40	40	40	36
40	40	39.08	40	40	40	36.19
40	40	40	40	40	40	37.75
40	40	40	40	40	40	40
40	40	40	40	40	40	40
40	40	40	40	40	40	35.72
40	40	40	40	40	40	40
40	40	40	40	40	40	35.93
40	40	35.66	40	40	40	40
40	40	40	40	40	40	40
40	40	37.03	40	40	40	40
40	40	36.37	40	40	40	40
40	40	39.03	40	40	40	40
40	40	35.27	40	40	40	40
40	40	40	40	40	40	40
40	40	36.9	40	40	40	40
40	40	40	40	40	40	40
40	40	36.68	40	40	40	40
40	40	37.12	40	40	40	40
40	40	40	40	40	40	40
40	40	40	40	40	40	40
40	40	36.15	40	40	40	40
40	40	37.16	40	40	40	40
40	40	36.72	40	40	40	40
40	40	36.1	40	40	40	40
40	40	37.05	40	40	40	40
40	40	36.08	40	40	40	40
40	40	35.7	40	40	40	40
40	40	36.88	40	40	40	40
40	40	36.59	40	40	40	40
40	40	35.4	40	40	40	40
40	40	37.36	40	40	40	40
40	40	36.38	40	40	40	40
40	40	40	40	40	40	40
40	40	40	40	40	40	40
40	40	40	40	40	40	40
40	40	37.47	40	40	40	40
40	40	40	40	40	40	40
40	40	35.36	40	40	40	40
40	40	40	40	40	40	40
40	40	35.81	40	40	40	40
40	40	37.46	40	40	40	40
40	40	35.18	40	40	40	40
40	40	40	40	40	40	40
40	40	40	40	40	40	40
40	40	40	40	40	40	40
40	40	40	40	40	40	40
40	40	40	40	40	40	40
40	40	40	40	40	40	40
40	40	40	40	40	40	40
40	40	40	40	40	40	40
40	40	40	40	40	40	40
40	40	40	40	40	40	40
40	40	40	40	40	40	40
40	40	35	40	40	40	40
40	40	40	40	40	40	40
40	40	37.27	40	40	40	40
40	40	36.27	40	40	40	40
40	40	40	40	40	40	40
40	40	40	40	40	40	40
40	40	35.13	40	40	40	40
40	40	38.82	40	40	40	40
40	40	40	40	40	40	40
40	40	40	40	40	40	40
40	40	40	40	40	40	40
40	40	36.81	40	40	40	40
40	40	37.56	40	40	40	40
40	40	40	40	40	40	40
40	40	40	40	40	40	40
40	40	40	40	40	40	40
40	40	40	40	40	40	40
40	40	36	40	40	40	40
40	40	40	40	40	40	40
40	40	40	40	40	40	40
40	40	37.02	40	40	40	40
40	40	36.6	40	40	40	40
40	40	40	40	40	40	40
40	40	40	40	40	40	40
40	40	36.79	40	40	40	40
40	40	35.5	40	40	40	40
40	40	35.83	40	40	40	40
40	40	40	40	40	40	40
40	40	35.4	40	40	40	40
40	40	36.97	40	40	40	40
40	40	36.17	40	40	40	40
40	40	36.68	40	40	40	40
40	40	35.5	40	40	40	40
40	40	37.7	40	40	40	40
40	40	35.23	40	40	40	40
40	40	35.44	40	40	40	40
40	40	34.34	40	40	40	40
40	40	40	40	40	40	40
40	40	40	40	40	40	40
40	40	40	40	40	40	40
40	40	40	40	40	40	40
40	40	35.5	40	40	40	40
40	40	40	40	40	40	40
40	40	35.18	40	40	40	40
40	40	35.64	40	40	40	40
40	40	34.93	40	40	40	40
40	40	40	40	40	40	40
40	40	40	40	40	40	40
40	40	37.71	40	40	40	40
40	40	40	40	40	40	40
40	40	40	40	40	40	40
40	40	40	40	40	40	40
40	40	36.58	40	40	40	40
40	40	37.53	40	40	40	40
40	40	40	40	40	40	40
40	40	40	40	40	40	40
40	40	40	40	40	40	40
40	40	40	40	40	40	40
40	40	40	40	40	40	40
40	40	40	40	40	40	40
40	40	37.41	40	40	40	40
40	40	40	40	40	40	40
40	40	35.49	40	40	40	40
40	40	35.41	40	40	40	40
40	40	37.13	40	40	40	40
40	40	40	40	40	40	40
40	40	36.19	40	40	40	40
40	40	40	40	40	40	40
40	40	36.47	40	40	40	40
40	40	40	40	40	40	40
40	40	40	40	40	40	40
40	40	40	40	40	40	40
40	40	36.01	40	40	40	40
40	40	40	40	40	40	40
40	40	37.76	40	40	40	40
40	40	35.25	40	40	40	40
40	40	40	40	40	40	40
40	40	37.14	40	40	40	40
40	40	38.07	40	40	40	40
40	40	37.05	40	40	40	40
40	40	37.11	40	40	40	40
40	40	35.92	40	40	40	40
40	40	40	40	40	40	40
40	40	36.71	40	40	40	40
40	40	34.93	40	40	40	40
40	40	40	40	40	40	40
40	40	40	40	40	40	40
40	40	40	40	40	40	40
40	40	40	40	40	40	40
40	40	36.38	40	40	40	40
40	40	34.8	40	40	40	40
40	40	39.88	40	40	40	40
40	40	36.41	40	40	40	40
40	40	40	40	40	40	40
40	40	34.32	40	40	40	40
40	40	40	40	40	40	40
40	40	40	40	40	40	40
40	40	36.43	40	40	40	40
40	40	38.62	40	40	40	40
40	40	40	40	40	40	40
40	40	36.5	40	40	40	40
40	40	36.59	40	40	40	40
40	40	40	40	40	40	40
40	40	40	40	40	40	40
40	40	36.33	40	40	40	40
40	40	40	40	40	40	40
40	40	35.71	40	40	40	40
40	40	36.6	40	40	40	40
40	40	40	40	40	40	40
40	40	40	40	40	40	40
40	40	34.63	40	40	40	40
40	40	35.1	40	40	40	40
40	40	34.52	40	40	40	40
40	40	36.18	40	40	40	40
40	40	35.47	40	40	40	40
40	40	36.42	40	40	40	40
40	40	40	40	40	40	40
40	40	40	40	40	40	40
40	40	40	40	40	40	40
40	40	40	40	40	40	40
40	40	40	40	40	40	40
40	40	40	40	40	40	40
40	40	40	40	40	40	40
40	40	40	40	40	40	40
40	40	34.78	40	40	40	40
40	40	40	40	40	40	40
40	40	35.82	40	40	40	40
40	40	40	40	40	40	40
40	40	40	40	40	40	40
40	40	35.96	40	40	40	40
40	40	40	40	40	40	40
40	40	40	40	40	40	40
40	40	40	40	40	40	40
40	40	40	40	40	40	40
40	40	40	40	40	40	40
40	40	40	40	40	40	40
40	40	36.69	40	40	40	40
40	40	36.26	40	40	40	40
40	40	37.96	40	40	40	40
40	40	36.1	40	40	40	40
40	40	40	40	40	40	40
40	40	40	40	40	40	40
40	40	40	40	40	40	40
