# Supplementary material for: Serial ‘deep-sampling’ PCR of fragmented DNA reveals the wide range of Trypanosoma cruzi burden among chronically infected human, macaque, and canine hosts, and allows accurate monitoring of parasite load following treatment
Source: eLife. 2025 Apr 15;14:RP104547. doi: 10.7554/eLife.104547 (PMC11999692; doi:10.7554/eLife.104547)
Supplement: Figure 5—source data 2. [file elife-104547-fig5-data2.xlsx]

## Sheet: Full data
reactions for which a Ct value is not obtained are set at "40"
102	101	100	10-1	10-2	10-3	10-4	10-5	10-6	10-7	10-8	10-9	NTC
12.78	16.41	19.84	23.47	26.57	30.59	32.98	40	37.19	37.25	35.45	36.13	40
12.58	16.08	19.39	23.17	26.55	29.95	32.64	37.15	40	37.19	35.5	37.23	40
12.51	16.14	19.66	23.14	26.55	30	32.79	40	40	35.64	40	40	40
12.53	16.24	19.45	23.23	26.6	30.08	33.76	37.06	40	37.54	40	40	40
12.94	16.41	19.85	23.4	26.31	29.4	32.95	33.26	40	40	40	40	40
12.86	16.21	19.79	23.48	26.61	29.88	32.51	35	40	40	40	40	40
12.73	16.13	19.66	23.29	26.31	29.71	33.77	35.88	38.07	40	40	40	40
12.72	16.45	19.84	23.6	26.58	29.72	33.04	37.76	40	40	40	40	40
12.97	16.26	19.79	23.18	26.23	29.42	33.93	38.25	37.53	40	40	40	40
12.99	16.12	19.63	23.27	26.62	30.18	32.86	40	40	40	40	40	40
				26.22	29.7	34.35	40	37.21	40	40	40	40
				26.74	30.22	33.7	40	37.5	40	40	40	40
				26.41	29.61	34.97	37.57	37.5	40	40	40	40
				26.49	29.63	33.64	40	40	40	40	40	40
				26.6	29.73	33.24	38.58	37.7	40	40	40	40
				26.28	29.21	33.12	40	40	40	40	40	40
				26.25	29.6	32.95	40	35.32	40	40	40	40
				26.39	30.03	34.14	39.12	40	40	40	40	40
				26.47	29.87	33.19	40	40	40	40	40	40
				26.51	30.24	33.43	36.51	40	40	40	40	40
				27.23	30.09	34.07	35.85	36.82	40	40	40	40
				26.4	29.63	32.85	37.58	40	40	40	40	40
				26.3	29.87	33.8	40	40	40	40	40	40
				26.58	30.66	33.18	36.11	40	40	40	40	40
				27.33	30.06	32.65	37.38	39.37	40	40	40	40
				27.64	29.86	32.99	40	40	40	40	40	40
				26.63	29.5	32.97	37.55	37.36	40	40	40	40
				26.71	30.04	33.49	40	36.9	40	40	40	40
				26.53	29.39	33.53	32.56	40	40	40	40	40
				26.68	30.05	32.61	35.67	40	40	40	40	40
				26.58	29.52	33.73	37.41	40	40	40	40	40
				26.34	29.81	33.12	40	40	40	40	40	40
				26.66	29.87	34.22	40	37.47	40	40	40	40
				26.65	29.96	33.02	40	38.19	40	40	40	40
				27.06	30.14	33.23	40	40	40	40	40	40
				26.78	30.15	33.07	40	40	40	40	40	40
				26.72	29.79	33.63	37.13	40	40	40	40	40
				26.86	29.8	34.53	35.23	40	40	40	40	40
				26.7	29.82	33.62	40	40	40	40	40	40
				26.62	29.93	33.06	37.56	36.53	40	40	40	40
				26.67	30.04	34.19	40	40	40	40	40	40
				26.91	29.87	32.67	36.52	40	40	40	40	40
				26.95	30.14	32.94	40	40	40	40	40	40
				26.57	29.58	32.82	37.68	40	40	40	40	40
				27.04	29.44	32.97	38.32	40	40	40	40	40
				26.95	30.2	32.67	40	40	40	40	40	40
				27.08	29.47	32.07	36.88	40	40	40	40	40
				26.42	29.7	33.57	40	40	40	40	40	40
				26.78	29.83	33.36	36.01	37.9	40	40	40	40
				26.69	29.9	34.66	37.64	40	40	40	40	40
				26.47	30.21	33.03	36.27	40	40	40	40	40
				26.36	29.97	32.76	40	37.16	40	40	40	40
				26.57	29.24	34.02	40	40	40	40	40	40
				26.48	29.94	33.36	40	38.07	40	40	40	40
				26.58	29.58	33.21	40	40	40	40	40	40
				26.64	30.15	33.9	37.58	37.18	40	40	40	40
				26.42	29.81	34.14	40	37.37	40	40	40	40
				26.8	30.39	32.54	36.98	40	40	40	40	40
				26.83	29.39	32.65	40	37.48	40	40	40	40
				26.6	29.93	33.36	37.84	40	40	40	40	40
				26.53	29.65	33.18	40	40	40	40	40	40
				27.01	30.37	33.31	36.31	40	40	40	40	40
				26.65	29.43	33.15	40	37.27	40	40	40	40
				26.48	30.05	33.29	37.79	37.71	40	40	40	40
				26.77	29.59	32.45	40	40	40	40	40	40
				26.38	30.04	33.79	40	40	40	40	40	40
				26.68	30.12	34.18	37.45	36.09	40	40	40	40
				26.76	30.09	32.86	38.22	37.22	40	40	40	40
				26.5	29.64	31.14	40	37.45	40	40	40	40
				26.62	29.45	33.61	40	36.9	40	40	40	40
				27.18	29.34	33.15	40	40	40	40	40	40
				26.54	29.62	33.2	40	40	40	40	40	40
										40	40	40
										40	40	40
										40	40	40
										40	40	40
										40	40	40
										40	40	40
										40	40	40
										40	40	40
										40	40	40
										40	40	40
										40	40	40
										40	40	40
										36.52	40	40
										34.84	40	40
										35.03	40	40
										35.1	40	40
										36.84	40	40
										40	40	40
										40	40	40
										40	40	40
										40	40	40
										40	40	40
										40	40	40
										40	37.41	40
										40	40	40
										40	40	40
										40	40	40
										40	37.25	40
										40	40	40
										40	40	40
										40	40	40
										40	40	40
										40	40	40
										40	40	40
										40	40	40
										40	40	40
										40	40	40
										40	40	40
										40	40	40
										40	40	40
										40	38.08	40
										40	40	40
										40	40	40
										40	40	40
										40	40	40
										40	40	40
										40	40	40
										40	40	40
										40	40	40
										40	40	40
										40	40	40
										40	36.22	40
										40	40	40
										40	37.62	40
										40	40	40
										40	40	40
										40	40	40
										40	40	40
										40	37.14	40
										40	40	40
										40	40	40
										40	40	40
										40	40	40
										40	40	40
										40	37.29	40
										40	40	40
										40	40	40
										40	40	40
										40	37.2	40
										40	40	40
										40	40	40
										40	40	40
										40	36.17	40
										40	40	40
										40	40	40
										40	40	40
										40	37.91	40
										40	40	40
										40	40	40
										40	40	40
										40	40	40
										40	37.52	40
										40	40	40
										40	40	40
										40	40	40
										40	40	40
										40	37.66	40
										40	40	40
										40	40	40
										40	40	40
										40	40	40
										40	40	40
										40	40	40
										40	40	40
										40	40	40
										40	40	40
										40	40	40
										40	40	40
										40	40	40
										40	40	40
										40	40	40
										40	40	40
										40	40	40
										40	40	40
										40	40	40
										40	40	40
										40	40	40
										40	40	40
										37.1	40	40
										36.97	40	40
										37.07	40	40
										37.11	40	40
										37.95	40	40
										36.23	40	40
										37.34	40	40
										36.82	40	40
										36.65	40	40
										40	40	40
										40	40	40
										40	40	40
										40	40	40
										40	40	40
										40	40	40
										40	40	40
										40	40	40
										40	40	40
										40	40	40
										40	40	40
										40	40	40
										40	40	40
										40	40	40
										40	40	40
										40	40	40
										40	40	40
										40	40	40
										40	40	40
										40	40	40
										40	40	40
										40	40	40
										40	40	40
										40	40	40
										40	40	40
										40	40	40
										40	40	40
										40	40	40
										40	40	40
										40	40	40
										40	40	40
										40	40	40
										40	40	40
										40	40	40
										40	40	40
										40	40	40
										40	40	40
										40	40	40
										40	40	40
										40	40	40
										40	40	40
										40	40	40
										40	40	40
										40	40	40
										40	40	40
										40	40	40
										40	40	40
										40	40	40
										40	40	40
										40	40	40
										40	40	40
										40	40	40
										40	40	40
										40	40	40
										40	40	40
										40	40	40
										40	40	40
										40	40	40
										40	40	40
										40	40	40
										40	40	40
										40	40	40
										40	40	40
										40	40	40
										40	40	40
										40	40	40
										40	40	40
										40	40	40
										40	40	40
										40	40	40
										40	40	40
										40	40	40
										40	40	40
										40	40	40
										40	40	40
										40	40	40
										40	40	40
										40	40	40
										40	40	40
										40	40	40
										40	40	40
										40	40	40
										40	40	40
										40	40	40
										40	40	40
										40	40	40
										40	40	40
										40	40	40
										40	40	40
										40	40	40
										40	40	40
										40	40	40
										40	40	40
										40	40	40
										40	40	40
										40	40	40
										40	40	40
										40	40	40
										40	40	40
										40	40	40
										40	40	40
										40	40	40
										40	40	40
										40	40	40
										40	40	40
										40	40	40
										40	40	40
										40	40	40
										40	40	40
										40	40	40
										40	40	40
										40	40	40
										40	40	40
										40	40	40
										40	40	40
										40	40	40
										40	40	40
										40	40	40
										40	40	40
										40	40	40
										40	40	40
										40	40	40
										40	40	40
										40	40	40
										40	40	40
										40	40	40
										40	40	40
										40	40	40
										40	40	40
										40	40	40
										40	40	40
										40	40	40
										40	40	40
										40	40	40
										40	40	40
										40	40	40
										40	40	40
										40	40	40
										40	40	40
										40	40	40
										40	40	40
										40	40	40
										40	40	40
										40	40	40
										40	40	40
										40	40	40
										40	40	40
										40	40	40
										40	40	40
											40	40
											40	40
											40	40
											40	40
											40	40
											40	40
											40	40
											40	40
											40	40
											40	40
											40	40
											40	40
											40	40
											40	40
											40	40
											40	40
											40	40
											40	40
											40	40
											40	40
											40	40
											40	40
											40	40
											40	40
											40	40
											40	40
											40	40
											40	40
											40	40
											40	40
											40	40
											40	40
											40	40
											40	40
											40	40
											40	40
											40	40
											40	40
											40	40
											40	40
											40	40
												40
												40
												40
												40
												40

## Sheet: Inset 1
PE/rxn	Mean Cq
100	12.761
10	16.245
1	19.69
0.1	23.323
0.01	26.6417
0.001	29.8456
0.0001	33.299
1e-05	36.8794

## Sheet: Inset2
PE/rxn	% pos
0.0001	100
1e-05	50
1e-06	37.5
1e-07	5.55556
