# Supplementary material for: Serial ‘deep-sampling’ PCR of fragmented DNA reveals the wide range of Trypanosoma cruzi burden among chronically infected human, macaque, and canine hosts, and allows accurate monitoring of parasite load following treatment
Source: eLife. 2025 Apr 15;14:RP104547. doi: 10.7554/eLife.104547 (PMC11999692; doi:10.7554/eLife.104547)
Supplement: Figure 6—source data 1. [file elife-104547-fig6-data1.xlsx]

## Sheet: P3
reactions for which a Ct value is not obtained are set at "40"
Wh. Blood	Cell Pellet	Plasma
32.2	31.84	35.08
32.23	32.12	39.82
33.49	37.83	35.25
33.24	37.78	33.58
32.3	32.81	33.68
34.39	35.23	34.05
33.37	40	33.72
32.59	32.64	33.3
32.28	32.55	36.23
33.06	32.15	35.57
33.23	32.44	33.9
32.33	32.31	34.3

## Sheet: P6
reactions for which a Ct value is not obtained are set at "40"
Wh. Blood	Cell Pellet	Plasma
40	40	33.98
40	37.48	35.6
40	35.23	35.23
40	40	40
40	40	40
40	37.52	32.94
40	37.48	39.13
40	37.03	34.92
40	40	37.21
40	38.29	40
40	36.46	34
40	34.49	35.59

## Sheet: P11
reactions for which a Ct value is not obtained are set at "40"
Wh. Blood	Cell Pellet	Plasma
39.19	40	40
40	40	40
40	40	40
40	40	40
40	40	40
40	40	40
40	40	40
40	40	40
40	40	40
40	40	40
40	40	40
40	40	40

## Sheet: P10
reactions for which a Ct value is not obtained are set at "40"
Wh. Blood	Cell Pellet	Plasma
32.58	31.28	40
32.08	31.08	40
32.58	31.23	40
33.32	30.81	40
32.36	32.03	40
32.82	30.66	40
32.01	31.14	40
33.31	31.27	40
32.33	31.71	40
32.7	31.2	40
33.01	31.5	40
30.82	31.03	40

## Sheet: P9
reactions for which a Ct value is not obtained are set at "40"
Wh. Blood	Cell Pellet	Plasma
35.72	33.18	40
35.91	34.09	40
35.19	34.22	40
34.17	33.79	40
33.86	34.3	40
37.04	34.03	40
35.74	33.62	40
35.09	33.2	40
36.64	34.03	40
35.87	34.13	40
36.23	34.05	40
38.6	34.85	40

## Sheet: P19
reactions for which a Ct value is not obtained are set at "40"
Wh. Blood	Cell Pellet	Plasma
29.98	29.98	35.01
30.33	29.87	37.87
30.2	29.76	35.22
29.94	29.77	37.46
30.12	30.14	37.85
30.35	29.99	36.62
30.36	30.02	36.38
30.25	29.64	39.71
30.11	29.93	36.1
30.18	29.63	34.61
30	29.51	36.42
30.64	29.5	38.52

## Sheet: N2
reactions for which a Ct value is not obtained are set at "40"
Wh. Blood	Cell Pellet	Plasma
40	40	40
40	40	40
40	40	40
40	40	40
40	40	40
40	40	40
40	40	40
40	40	40
40	40	40
40	40	40
40	40	40
40	40	40
