# Supplementary material for: Serial ‘deep-sampling’ PCR of fragmented DNA reveals the wide range of Trypanosoma cruzi burden among chronically infected human, macaque, and canine hosts, and allows accurate monitoring of parasite load following treatment
Source: eLife. 2025 Apr 15;14:RP104547. doi: 10.7554/eLife.104547 (PMC11999692; doi:10.7554/eLife.104547)
Supplement: Figure 7—figure supplement 1—source data 1. [file elife-104547-fig7-figsupp1-data1.xlsx]

## Sheet: Canine
reactions for which a Ct value is not obtained are set at "40"
Blood	Sk. muscle	Heart
36.51	35.52	40
35.08	32.83	36.2
35.71	29.3	39.86
37.51	34.68	39.18
35.47	32.67	40
39.59	35.03	35.39
40	40	38.23
40	35.84	40
37.45	32.9	36.99
40	36.24	35.38
36.89	32.39	35.36
40	29.08	35.43
40	29.51	40
37.99	34.28	39.31
40	32.93	40
40	37.63	36.45
40	40	36.92
40	34.25	40
40	33.56	40
40	38.44	37.89
36.7
38.03
35.2
40
40
37.42
36.06
37.08
37.41
36.36
35.58
40
34.54
40
40
40
40
40
40
40
40
40
40
36.1
40
40
40
40
38.16
35.12
40
40
40
35.43
37.05
36.11
35.63
40
34.42
40
40
36.03
37.18
36.75
35.85
37.37
40
35.75
36.12
40
35.48
40
40
36.02
34.09
37.43
36.57
40
35.85
36.21
37.11
40
40
37.61
34.52
35.38
37.35
36.58
35.36
36.71
34.44
37.49

## Sheet: Macaque 1
reactions for which a Ct value is not obtained are set at "40"
Blood	Sk. muscle	Heart
40	38.33	38.11
30.85	35.26	40
40	39.04	40
29.31	38.26	40
32.57	35.81	40
40	37.45	40
40	39.45	40
40	40	40
40	40	40
40	40	40
	40	40
	40	40
	40	40
	40	40
	40	40
	40	40
	40	40
	40	40
	40	40
	40	40
	40	40
	40	40
	40	40
	40	40
	40	40
	40	40
	40	40
	40	40
	40	40
	40	40
	40	40
	40	40
	40	40
	40	40
	40	40
	40	40
	40	40
	40	40
	40	40
	40	40
	40	40
	40	40
	40	40
	40	40
	40	40
	40	40
	40	40
	40	40
	40	40
	40	40
	40	40
	40	40
	40	40
	40	40
	40	40
	40	40
	40	40
	40	40
	40	40
	40	40
	40	40
	40	40
	40	40
	40	40
	40	40
	40	40
	40	40
	40	40
	40	40
	40	40
	40	40
	40	40
	40	40
	40	40
	40	40
	40	40
	40	40
	40	40
	40	40
	40	40
	40	40
	40	40
	40	40
	40	40
	40	40
	40	40
	40	40
	40	40
	40	40
	40	40
	40	40
	40	40
	40	40
	40	40
	40	40
	40	40
	40	40
	40	40
	40	40
	40	40
	40	40
	40	40
	40	40
	40	40
	40	40
	40	40
	40	40
	40	40
	40	40
	40	40
	40	40
	40	40
	40	40
	40	40
	40	40
	40	40
	40	40
	40	40
	40	40
	40	40
	40	40
	40	40
	40	40
	40	40
	40	40
	40	40
	40	40
	40	40
	40	40
	40	40
	40	40
	40	40
	40	40
	40	40
	40	40
	40	40
	40	40
	40	40
	40	40
	40	40
	40	40
	40	40
	40	40
	40	40
		40
		40
		40
		40
		40
		40
		40
		40
		40
		40
		40
		40
		40
		40
		40
		40
		40
		40
		40
		40
		40
		40
		40
		40
		40
		40
		40
		40
		40
		40
		40
		40
		40
		40
		40
		40
		40
		40
		40
		40
		40
		40
		40
		40
		40
		40
		40
		40
		40
		40
		40
		40
		40
		40
		40
		40
		40
		40
		40
		40
		40
		40
		40
		40
		40
		40
		40
		40
		40
		40
		40
		40
		40
		40
		40
		40
		40
		40
		40
		40

## Sheet: Macaque 2
reactions for which a Ct value is not obtained are set at "40"
Plasma	Tissue
28.06	40
27.94	40
28.02	40
27.91	40
27.78	40
27.88	40
27.79	40
27.9	40
27.72	40
27.79	40
27.82	40
27.97	40
28.04	40
27.8	40
27.86	40
27.8	40
27.76	40
27.75	40
27.71	40
27.8	40
27.73	40
27.79	40
27.77	40
27.96	28.57
27.98	40
27.76	40
27.77	40
27.7	31.44
27.73	40
27.77	40
27.74	40
27.63	40
27.75	40
27.62	40
27.71	33.03
27.36	40
27.91	35.09
27.87	40
27.87	31.58
27.63	40
27.72	40
27.77	29.59
27.71	40
27.76	33.7
27.81	40
27.89	32.12
27.83	40
27.87	40
27.86	40
27.8	28.63
27.76	25.09
27.73	40
27.76	29.62
27.79	25.47
27.79	33.73
27.86	34.69
27.86	32.1
27.88	40
27.85	40
27.88	40
27.87	40
27.81	34.71
27.9	36.36
27.73	40
27.88	40
27.84	40
28.02	40
27.87	40
34.02	40
27.92	40
27.94	40
27.85	40
27.75	40
27.85	40
27.79	40
27.86	40
27.8	40
27.8	40
27.93	40
28.01	40
27.74	40
27.43	40
27.97	40
27.82	40
27.74	40
27.89	40
28.26	40
28.94	40
27.98	40
31.21	40
34.37	29.16
35.12	40
	40
	40
	31.61
	40
	40
	40
	40
	40
	40
	32.2
	40
	36.12
	40
	30.65
	40
	40
	29.75
	40
	35.25
	40
	33.11
	40
	40
	40
	27.78
	25.02
	40
	30.02
	25.71
	33.22
	37.06
	34.3
	40
	40
	40
	40
	34.86
	36.29
	40
