# Supplementary material for: Serial ‘deep-sampling’ PCR of fragmented DNA reveals the wide range of Trypanosoma cruzi burden among chronically infected human, macaque, and canine hosts, and allows accurate monitoring of parasite load following treatment
Source: eLife. 2025 Apr 15;14:RP104547. doi: 10.7554/eLife.104547 (PMC11999692; doi:10.7554/eLife.104547)
Supplement: Figure 7—source data 1. [file elife-104547-fig7-data1.xlsx]

## Sheet: Sheet1
reactions for which a Ct value is not obtained are set at "40"
IN101	IN69	IN102	UGA1	UGA2	UGA3	IN104	IN105	IN106
32.11	40	35.31	31.57	40	36.06	37.19	34.92	30.91
31.95	40	36.61	31.65	40	35.64	40	36.08	30.79
31.92	40	35.81	30.88	40	36.3	40	35.53	31.36
32.34	40	35.38	31.75	40	40	40	34.42	31.01
32.23	40	40	31.19	40	40	40	34.59	32.16
	40			40	40	40
	40			40	40	40
	40			40	40	40
	40			40	40	40
	40			40	40	40
	40			40	40	40
	40			40	40	40
	40			40	40	40
	40			40	40	40
	40			40	40	40
	40			40	40	40
	40			40	40	40
	40			40	40	40
	40			40	40	40
	40			40	40	40
	40			40	40	40
	40			40	40	40
	40			40	40	40
	40			40	40	40
	40			40	40	40
	40			40	40	40
	40			40	40	40
	40			40	40	40
	40			40	40	40
	40			40	40	40
	40			40	40	40
	40			40	40	40
	40			40	40	40
	40			40	40	40
	40			40	40	40
	40			40	40	40
	40			40	40	40
	40			40	40	40
	40			40	40	40
	40			40	40	40
	40			40	40	40
	40			40	40	40
	40			40	40	40
	40			40	40	40
	40			40	40	40
	40			40	40	40
	40			40	40	40
	40			40	40	40
	40			40	40	40
	40			40	40	40
	40			40	40	40
	40			40	40	40
	40			40	40	40
	40			40	40	40
	40			40	40	40
	40			40	40	40
	40			40	40	40
	40			40	40	40
	40			40	40	40
	40			40	40	40
	40			40	40	40
	40			40	40	40
	40			40	40	40
	40			40	40	40
	40			40	40	40
	40			40	40	40
	40			40	40	40
	40			40	40	40
	40			40	40	40
	40			40	40	40
	40			40	40	40
	40			40	40	40
	40			40	40	40
	40			40	40	40
	40			40	40	40
	40			40	40	40
	40			40	40	40
	40			40	40	40
	40			40	40	40
	40			40	40	40
	40			40	40	40
	40			40	40	40
	40			40	40	40
	40			40	40	40
	40			40	40	40
	40			40	40	40
	40			40	40	40
	40			40	40	40
	40			40	40	40
	40			40	40	40
	40			40	40	40
	40			40	40	40
	40			40	40	40
	40			40	40	40
	40			40	40	40
	40			40	40	40
	40			40	40	40
	40			40	40	40
	40			40	40	40
	40			40	40	40
	40			40	40	40
	40			40	40	40
	40			40	40	40
	40			40	40	40
	40			40	40	40
	40			40	40	40
	40			40	40	40
	40			40	40	40
	40			40	40	40
	40			40	40	40
	40			40	40	40
	40			40	40	40
	40			40	40	40
	40			40	40	40
	40			40	40	40
	40			40	40	40
	40			40	40	40
	40			40	40	40
	40			40	40	40
	40			40	40	40
	40			40	40	40
	40			40	40	40
	40			40	40	40
	40			40	40	40
	40			40	40	40
	40			40	40	40
	40			40	40	40
	40			40	40	40
	40			40	40	40
	40			40	40	40
	40			40	40	40
	40			40	40	40
	40			40	40	40
	40			40	40	40
	40			40	40	40
	40			40	40	40
	40			40	40	40
	40			40	40	40
	40			40	40	40
	40			40	40	40
	40			40	40	40
	40			40	40	40
	40			40	40	40
	40			40	40	40
	40			40	40	40
	40			40	40	40
	40			40	40	40
	40			40	40	40
	40			40	40	40
	40			40	40	40
	40			40	40	40
	40			40	40	40
	40			40	40	40
	40			40	40	40
	40			40	40	40
	40			40	40	40
	40			40	40	40
	40			40	40	40
	40			40	40	40
	40			40	40	40
	40			40	40	40
	40			40	40	40
	40			40	40	40
	40			40	40	40
	40			40	40	40
	40			40	40	40
	40			40	40	40
	40			40	40	40
	40			40	40	40
	40			40	40	40
	40			40	40	40
	40			40	40	40
	40			40	40	40
	40			40	40	40
	40			40	40	40
	40			40	40	40
	40			40	40	40
	40			40	40	40
	40			40	40	40
	40			40	40	40
	40			40	40	40
	40			40	40	40
	40			40	40	40
	40			40	40	40
	40			40	40	40
	40			40	40	40
	40			40	40	40
	40			40	40	40
	40			40	40	40
	40			40	40	40
	40			40	40	40
	40			40	40	40
	40			40	40	40
	40			40	40	40
	40			40	40	40
	40			40	40	40
	40			40	40	40
	40			40	40	40
	40			40	40	40
	40			40	40	40
	40			40	40	40
	40			40	40	40
	40			40	40	40
	40			40	40	40
	40			40	40	40
	40			40	40	40
	40			40	40	40
	40			40	40	40
	40			40	40	40
	40			40	40	40
	40			40	40	40
	40			40	40	40
	40			40	40	40
	40			40	40	40
	40			40	40	40
	40			40	40	40
	40			40	40	40
	40			40	40	40
	40			40	40	40
	40			40	40	40
	40			40	40	40
	40			40	40	40
	40			40	40	40
	40			40	40	40
	40			40	40	40
	40			40	40	40
	40			40	40	40
	40			40	40	40
	40			40	40	40
	40			40	40	40
	40			40	40	40
	40			40	40	40
	40			40	40	40
	40			40	40	40
	40			40	40	40
	40			40	40	40
	40			40	40	40
	40			40	40	40
	40			40	40	40
	40			40	40	40
	40			40	40	40
	40			40	40	40
	40			40	40	40
	40			40	40	40
	40			40	40	40
	40			40	40	40
	40			40	40	40
	40			40	40	40
	40			40	40	40
	40			40	40	40
	40			40	40	40
	40			40	40	40
	40			40	40	40
	40			40	40	40
	40			40	40	40
