# Supplementary material for: Serial ‘deep-sampling’ PCR of fragmented DNA reveals the wide range of Trypanosoma cruzi burden among chronically infected human, macaque, and canine hosts, and allows accurate monitoring of parasite load following treatment
Source: eLife. 2025 Apr 15;14:RP104547. doi: 10.7554/eLife.104547 (PMC11999692; doi:10.7554/eLife.104547)
Supplement: Figure 7—source data 2. [file elife-104547-fig7-data2.xlsx]

## Sheet: Sheet1
reactions for which a Ct value is not obtained are set at "40"
Bu1	Co2	Ji3	To4	El5	Mo6	Tr7	Do8	Pe9	Bo10	Ac11	Wb12	Pe13	Ti14	Tim B	Bj15	An16	Si17	Sa18	Tr19	Ch20
31.22	34.8	33.77	35.12	34.01	30.88	28.05	36.96	30.37	33.14	29.55	32.5	35.77	40	40	40	40	40	40	40	40
31.31	34.56	33.35	35.76	35.96	30.14	28.06	34.61	30.71	33.84	29.16	32.44	37.6	40	40	40	40	40	40	40	40
30.69	34.15	34.56	35.75	35.45	30.56	28.14	35.1	30.81	32.72	29.2	33.17	37.46	40	40	40	40	40	40	40	40
31.49	35.07	34.57	34.51	34.56	30.22	28.24	34.44	30.7	31.72	29.29	31.8	40	40	40	40	40	40	40	40	40
31.25	35.44	35.89	35.89	34.48	30.42	28.26	33.68	30.21	32.73	29.05	32.21	40	40	40	40	40	40	40	40	40
31.14	35.05	35.77	34.88	35.22	30.3	28.26	33.42	30.38	31.65	29.37	32.96	40	40	40	40	40	40	40	40	40
30.97	34.63	35.69	35.2	34.13	30.37	28.09	34.36	30.29	32.73	29.71	33.05	40	40	40	40	40	40	40	40	40
31.25	34.64	34.16	33.65	36.53	30.53	28.12	33.62	29.8	32.81	29.15	33.07	40	40	40	40	40	40	40	40	40
30.74	35.66	35.14	35.36	34.75	30.37	28.13	35.44	30.42	31.6	31.14	32.39	40	40	40	40	40	40	40	40	40
31.07	35.31	36.08	33.71	34.09	30.62	28.21	33.23	31.15	32.33	29.25	33.15	40	40	40	40	40	40	40	40	40
													40	40	40	40	40	40	40	40
													40	40	40	40	40	40	40	40
													40	40	40	40	40	40	40	40
													40	40	40	40	40	40	40	40
													40	40	40	40	40	40	40	40
													40	40	40	40	40	40	40	40
													40	40	40	40	40	40	40	40
													40	40	40	40	40	40	40	40
													40	40	40	40	40	40	40	40
													40	40	40	40	40	40	40	40
													37.02	35.08	35.19	35.99	34.53	40	40	40
													35.62	35.47	40	40	36.03	40	40	40
													40	35.72	40	40	40	40	40	40
													40	34.3	40	40	40	40	40	40
													40	34.41	40	40	40	40	40	40
													40	34.95	40	40	40	40	40	40
													40	40	40	40	40	40	40	40
													40	40	40	40	40	40	40	40
													40	40	40	40	40	40	40	40
													40	40	40	40	40	40	40	40
													40	40	40	40	40	36.15	34.35	40
													40	40	40	40	40	40	40	40
													40	40	40	40	40	40	40	40
													40	40	40	40	40	40	40	40
													40	40	40	40	40	40	40	40
													40	40	40	40	40	40	40	40
													40	40	40	40	40	40	40	40
													40	40	40	40	40	40	40	40
													40	40	40	40	40	40	40	40
													40	40	40	40	40	40	40	40
													40	40	40	40	40	40	40	40
													40	40	40	40	40	40	40	40
													40	40	40	40	40	40	40	40
													40	40	40	40	40	40	40	40
													40	40	40	40	40	40	40	40
													40	40	40	40	40	40	40	40
													40	40	40	40	40	40	40	40
													40	40	40	40	40	40	40	40
													40	40	40	40	40	40	40	40
													40	40	40	40	40	40	40	40
													40	40	40	40	40	40	40	40
													40	40	40	40	40	40	40	40
													40	40	40	40	40	40	40	40
													40	40	40	40	40	40	40	40
													40	40	40	40	40	40	40	40
													40	40	40	40	40	40	40	40
													40	40	40	40	40	40	40	40
													40	40	40	40	40	40	40	40
													40	40	40	40	40	40	40	40
													40	40	40	40	40	40	40	40
													40	40	40	40	40	40	40	40
													40	40	40	40	40	40	40	40
													40	40	40	40	40	40	40	40
													40	40	40	40	40	40	40	40
													40	40	40	40	40	40	40	40
													40	40	40	40	40	40	40	40
													40	40	40	40	40	40	40	40
													40	40	40	40	40	40	40	40
													40	40	40	40	40	40	40	40
													40	40	40	40	40	40	40	40
													40	40	40	40	40	40	40	40
													40	40	40	40	40	40	40	40
													40	40	40	40	40	40	40	40
													40	40	40	40	40	40	40	40
													40	40	40	40	40	40	40	40
													40	40	40	40	40	40	40	40
													40	40	40	40	40	40	40	40
													40	40	40	40	40	40	40	40
													40	40	40	40	40	40	40	40
													40	40	40	40	40	40	40	40
													40	40	40	40	40	40	40	40
													40	40	40	40	40	40	40	40
													40	40	40	40	40	40	40	40
													40	40	40	40	40	40	40	40
													40	40	40	40	40	40	40	40
													40	40	40	40	40	40	40	40
													40	40	40	40	40	40	40	40
													40	40	40	40	40	40	40	40
													40	40	40	40	40	40	40	40
													40	40	40	40	40	40	40	40
													40	40	40	40	40	40	40	40
													40	40	40	40	40	40	40	40
													40	40	40	40	40	40	40	40
													40	40	40	40	40	40	40	40
													40	40	40	40	40	40	40	40
													40	40	40	40	40	40	40	40
													40	40	40	40	40	40	40	40
													40	40	40	40	40	40	40	40
													40	40	40	40	40	40	40	40
													40	40	40	40	40	40	40	40
													40	40	40		40	40	40	40
													40	40	40		40	40	40	40
													40	40	40		40	40	40	40
													40	40	40		40	40	40	40
													40	40	40		40	40	40	40
													40	40	40		40	40	40	40
													40	40	40		40	40	40	40
													40	40	40		40	40	40	40
													40	40	40		40	40	40	40
													40	40	40		40	40	40	40
													40	40	40		40	40	40	40
													40	40	40		40	40	40	40
													40	40	40		40	40	40	40
													40	40	40		40	40	40	40
													40	40	40		40	40	40	40
													40	40	40		40	40	40	40
													40	40	40		40	40	40	40
													40	40	40		40	40	40	40
													40	40	40		40	40	40	40
													40	40	40		40	40	40	40
													40	40	40		40	40	40	40
													40	40	40		40	40	40	40
													40	40	40		40	40	40	40
													40	40	40		40	40	40	40
													40	40	40		40	40	40	40
													40	40	40		40	40	40	40
													40	40	40		40	40	40	40
													40	40	40		40	40	40	40
													40	40	40		40	40	40	40
													40	40	40		40	40	40	40
													40	40	40		40	40	40	40
													40	40	40		40	40	40	40
													40	40	40		40	40	40	40
													40	40	40		40	40	40	40
													40	40	40		40	40	40	40
													40	40	40		40	40	40	40
													40	40	40		40	40	40	40
													40	40	40		40	40	40	40
													40	40	40		40	40	40	40
													40	40	40		40	40	40	40
													40	40	40		40	40	40	40
													40	40	40		40	40	40	40
													40	40	40		40	40	40	40
													40	40	40		40	40	40	40
													40	40	40		40	40	40	40
													40	40	40		40	40	40	40
													40	40	40		40	40	40	40
													40	40	40		40	40	40	40
													40	40	40		40	40	40	40
													40	40	40		40	40	40	40
													40	40	40		40	40	40	40
													40	40	40		40	40	40	40
													40	40	40		40	40	40	40
													40	40	40		40	40	40	40
													40	40	40		40	40	40	40
													40	40	40		40	40	40	40
													40	40	40		40	40	40	40
													40	40	40		40	40	40	40
													40	40	40		40	40	40	40
													40	40	40		40	40	40	40
													40	40	40		40	40	40	40
													40	40	40		40	40	40	40
													40	40	40		40	40	40	40
													40	40	40		40	40	40	40
														40	40		40	40	40	40
														40	40		40	40	40	40
														40	40		40	40	40	40
														40	40		40	40	40	40
														40	40		40	40	40	40
														40	40		40	40	40	40
														40	40		40	40	40	40
														40	40		40	40	40	40
														40	40		40	40	40	40
														40	40		40	40	40	40
														40	40		40	40		40
														40	40		40	40		40
														40	40		40	40		40
														40	40		40	40		40
														40	40		40	40		40
														40	40		40	40		40
														40	40		40	40		40
														40	40		40	40		40
														40	40		40	40		40
														40	40		40	40		40
														40	40		40	40		40
														40	40		40	40		40
														40	40		40	40		40
														40	40		40	40		40
														40	40		40	40		40
														40	40		40	40		40
														40	40		40	40		40
														40	40		40	40		40
														40	40		40	40		40
														40	40		40	40		40
														40	40		40	40		40
														40	40		40	40		40
														40	40		40	40		40
														40	40		40	40		40
														40	40		40	40		40
														40	40		40	40		40
														40	40		40	40		40
														40	40		40	40		40
														40	40		40	40		40
														40	40		40	40		40
														40	40		40	40		40
														40	40		40	40		40
														40	40		40	40		40
														40	40		40	40		40
														40	40		40	40		40
														40	40		40	40		40
														40	40		40	40		40
														40	40		40	40		40
														40	40		40	40		40
														40	40		40	40		40
														40	40		40	40		40
														40	40		40	40		40
														40	40		40	40		40
														40	40		40	40		40
														40	40		40	40		40
														40	40		40	40		40
														40	40		40	40		40
														40	40		40	40		40
														40	40		40			40
														40	40		40			40
														40	40		40			40
														40	40		40			40
														40	40		40			40
														40	40		40			40
														40	40		40			40
														40	40		40			40
														40	40		40			40
														40	40		40			40
														40	40		40			40
														40	40		40			40
														40	40		40			40
														40	40		40			36.94
														40	40		40			37.32
														40	40		40			34.34
														40	40		40
														40	40		40
														40	40		40
														40	40		40
														40	40		40
														40	40		40
															40		40
															40		40
															40		40
															40		40
															40		40
															40		40
															40		40
															40		40
															40		40
															40		40
															40		40
															40		40
															40		40
															40		40
															40		40
															40		40
															40		40
															40		40
															40		40
															40		40
															40		40
															40		40
															40		40
															40		40
															40		40
															40		40
															40		40
															40		40
																	40
																	40
																	40
																	40
																	40
																	40
																	40
																	40
																	40
																	40
																	40
																	40
																	40
																	40
																	40
																	40
																	40
																	40
																	40
																	40
																	40
																	40
																	40
																	40
																	40
																	40
																	40
																	40
																	40
																	40
																	40
																	40
																	40
																	40
																	40
																	40
																	40
																	40
																	40
																	40
																	40
																	40
																	40
																	40
																	40
																	40
																	40
																	40
																	40
																	40
																	40
																	40
																	40
																	40
																	40
																	40
																	40
																	40
																	40
																	40
